# Supplementary material for: Essential roles of Caspase-3 in facilitating Myc-induced genetic instability and carcinogenesis
Source: eLife journal article supplement (doi:10.7554/elife.26371), 2017-07-10
Supplement: supp [file elife_poa_e26371_Fig.1_source_data_1.xlsx]

## Sheet: Sheet1
Cleaved Caspase 3 Assay
Vector Control							MCF10A + Myc
Total Cells	CC3 Positiv	Total Cells	CC3 Positiv	Total Cells	CC3 Positiv		Total Cells	CC3 Positiv	Total Cells	CC3 Positiv	Total Cells	CC3 Positiv
46	0	44	1	40	1		38	2	11	3	43	3
59	0	46	0	49	0		26	0	70	6	48	1
53	1	46	0	37	0		32	2	50	3	39	1
70	1	52	2	50	1		22	1	25	2	41	4
32	1	62	1	42	0		31	2	38	1	23	2
				39	0		59	1	18	1	25	2
% Positive	0.0115385		0.016		0.0077821		60	3	13	2	28	1
Standard Deviation	0.00411399						10	1	35	1
SEM	0.00237521						10	2
						% Positive		0.0486111		0.0730769		0.0566802
						Standard Deviation		0.0124669
						SEM		0.00719776
