# Supplementary material for: Essential roles of Caspase-3 in facilitating Myc-induced genetic instability and carcinogenesis
Source: eLife journal article supplement (doi:10.7554/elife.26371), 2017-07-10
Supplement: supp [file elife_poa_e26371_Fig.1_source_data_3.xlsx]

## Sheet: Sheet1
Vector	Chromosome	abberations	Chromosome	abberations	Chromosome	abberations		MYC	Chromosome No.	Abberations/cell	Chromosome Np.	Abberations	Chromosome No.	Abberations/cell		Casp3	Chromosome No.	Abberations/cell	Chromosome No.	Abberations/cell	Chromosome No.	Abberations/cell		Casp3 Myc	Chromosome No.	Aberrations/cell	Chromosome No.	Aberrations/cell	Chromosome No.	Aberrations/cell
	47	0	47	0	47	0			49	0	44	0	48	0			47	0	47	0	47	0			43	0	46	0	47	0
	46	0	47	0	47	0			48	0	47	1	46	0			47	0	46	0	47	0			47	0	47	0	47	0
	47	0	46	0	46	1			47	1	42	0	47	0			47	0	47	0	45	0			47	0	47	0	46	1
	45	0	47	0	47	0			50	0	37	0	46	1			47	0	47	0	51	0			47	1	46	0	43	0
	47	0	45	0	47	0			48	0	45	0	47	1			47	0	46	0	48	0			47	0	49	0	47	0
	45	0	48	0	47	1			46	0	48	0	47	0			48	0	45	0	44	0			46	0	46	0	47	0
	47	0	48	0	47	0			45	0	46	0	47	0			47	0	47	0	47	0			47	0	47	0	47	0
	47	0	47	0	47	0			46	0	48	0	43	1			44	0	47	0	47	0			47	1	47	0	47	0
	46	1	45	0	46	0			48	0	44	0	45	0			47	0	46	0	50	0			47	0	47	0	46	0
	47	0	47	0	46	0			48	1	47	1	46	0			47	0	46	0	43	0			49	0	47	0	45	0
	47	0	43	0	47	0			48	0	47	0	45	0			47	0	47	0	45	0			45	0	47	0	48	0
	47	0	47	0	45	0			47	1	55	0	47	0			46	0	45	0	47	0			47	0	47	0	48	0
	47	0	46	0	47	1			50	1	46	0	46	0			46	0	49	0	47	0			47	0	47	0	45	0
	46	0	47	0	46	0			48	0	45	0	43	0			45	0	47	0	49	0			47	0	46	0	45	0
	47	0	47	0	47	0			47	0	47	0	51	0			47	0	45	0	45	0			46	0	47	0	46	0
	46	0	49	0	44	0			49	0	46	0	47	0			47	0	47	0	52	0			47	0	48	0	44	0
	47	0	46	0	47	0			47	0	47	1	46	0			47	1	46	0	47	0			47	0	47	0	47	0
	47	0	47	0	46	0			47	0	47	0	47	0			46	0	49	0	50	0			47	0	47	0	48	0
	47	0	47	0	47	0			47	0	47	0	47	0			47	0	45	0	48	0			46	0	44	1	46	0
	47	0	47	0	46	0			45	0	46	2	47	0			47	0	45	0	50	0			46	0	47	0	47	0
	48	0	48	0	47	0			47	0	45	0	47	0			47	0	47	0	55	0			48	0	47	0	43	0
	47	0	49	1	47	0			48	0	47	0	47	0			47	0	47	0	48	0			46	0	47	0	47	0
	44	0	47	0	46	0			46	0	47	0	47	0			47	0	48	0	47	0			47	0	47	0	50	0
	47	0	46	1	45	0			47	0	44	0	47	0			48	1	48	0	49	0			47	0	46	0	46	0
	47	0	43	0	47	0			44	0	46	0	47	1			46	0	47	0	47	0			47	0	46	0	49	0
	47	0	47	0	47	0			50	0	41	0	47	0			46	0	47	0	47	1			47	0	45	0	46	1
	47	0	47	0	46	0			44	0	48	0	47	0			47	0	47	0	47	0			47	0	46	0	47	0
	47	0	46	0	47	0			49	0	45	0	46	0			47	0	47	0	43	0			47	1	44	0	48	0
	47	0	47	0	47	0			46	1	45	0	44	0			47	0	48	0	48	0			47	0	49	0	49	0
	47	0	47	0	44	0			47	0	46	1	47	0			47	0	44	0	45	0			47	0	44	0	47	0
	49	0	47	0	46	0			51	0	43	0	47	0			47	0	47	0	46	0			48	0	47	0	47	0
	43	0	47	0	44	0			47	0	45	1	46	1			47	0	46	0	47	0			45	1	46	1	47	1
	46	0	45	0	48	0			44	0	47	0	46	0			47	0	47	0	46	0			47	0	47	0	47	0
	47	0	47	0	47	0			48	0	61	0	44	2			47	0	47	1	46	0			47	0	42	0	47	0
	46	0	46	0	45	0			47	0	45	0	48	0			47	1	47	0	47	0			48	0	47	0	47	0
	45	0	46	0	46	0			47	0	44	0	47	0			47	0	46	0	47	0			47	0	47	0	45	0
	51	0	47	0	44	0			48	0	46	0	46	1			45	0	46	1	47	0			47	0	47	0	48	0
	48	0	46	0	48	0			44	0	45	0	47	0			45	0	47	0	47	0			46	0	46	0	45	0
	45	0	47	0	47	0			31	1	43	0	47	0			46	0	47	0	47	0			44	0	47	0	47	0
	47	0	47	0	47	0			47	0	47	0	47	0			47	0	47	0	48	0			47	0	47	0	47	0
	47	0	46	1	47	0			47	0	48	0	47	0			46	0	47	0	46	0			46	0	47	0	47	0
	47	0	47	0	47	0			47	0	44	0	47	0			47	0	45	0	47	0			47	0	47	0	47	0
	48	0	47	0	47	0			47	0	47	0	47	0			47	0	47	0	47	0			47	0	47	0	47	0
	49	0	46	0	45	0			49	0	46	0	50	0			47	0	44	0	47	0			45	0	46	0	45	0
	47	1	47	1	44	0			47	0	46	0	48	1			46	0	46	0	46	0			47	0	46	1	47	0
	47	0	47	0	46	0			42	1	44	0	50	0			47	0	46	0	47	0			46	0	47	0	47	0
	45	0	47	0	46	0			46	1	47	1	46	0			46	0	46	0	47	1			47	0	47	0	46	1
	42	0	46	0	47	0			47	0	42	2	48	0			45	0	47	0	48	0			47	0	45	0	47	0
	44	1	47	0	47	1			47	0	47	0	47	0			44	0	46	0	47	0			47	0	47	0	47	0
	43	0	47	0	47	0			47	0	47	1	40	0			47	0	45	0	46	0			49	0	48	0	47	0
	45	0	46.64	0.08	46.34	0.08			46.76	0.16	44	0	47	0			47	0	47	0	47.22	0.04			46.72	0.08	46.54	0.06	46.64	0.08
Average No.	46.4902	3									40	0	47	1			47	0	47	0
Rate of Aberration		0.0588235									55	4	47	0			45	0	45	0
											47	0	47	0			46	0	46	1
	28										37	0	45	0			45	0	47	0
											44	0	47	0			48	0	48	0
											47	1	46	0			46.5536	3	49	0
											41	0	46	0				0.0535714	46	1
											45.7586	16	46	1			0.892792		47	0
												0.275862	44	0			0.239091		47	0
		0.0588235											47	1			0.797078		46	0
		0.0392157											47	0				min	46.5574	4
													46	0				max		0.0655738
													47	1
													47	0
													46.5385	13
											3.63854			0.2
