# Supplementary material for: Essential roles of Caspase-3 in facilitating Myc-induced genetic instability and carcinogenesis
Source: eLife journal article supplement (doi:10.7554/elife.26371), 2017-07-10
Supplement: supp [file elife_poa_e26371_Fig.1_source_data_4.xlsx]

## Sheet: Sheet1
Cell line	MCF10A, gH2AX foci/cell, Set1	Set 2	Set 3		Myc, gH2AX foci /cell	set 2	set 3		Caspase 3 KO, gH2AX foci/cell	set 2	set 3		Casp3 Myc, gH2AX foci/cell	set2	set3
	0	1	1		0	0	0		0	0	0		0	1	0
	0	0	0		2	0	1		0	0	0		0	1	0
	1	1	0		0	0	0		1	1	0		0	0	0
	0	0	2		0	0	0		1	0	0		1	0	1
	0	0	1		2	1	1		0	0	0		0	0	0
	0	0	1		3	3	0		0	2	1		0	0	1
	0	0	0		4	0	1		1	0	0		1	1	0
	0	0	0		1	1	1		1	0	0		1	0	0
	0	1	0		0	1	0		1	0	1		1	1	0
	0	0	0		0	0	1		0	0	1		1	0	0
	0	1	0		0	0	0		1	1	1		2	0	0
	0	1	0		2	2	0		1	2	1		1	0	1
	1	1	1		1	1	2		0	3	0		1	0	0
	0	0	0		0	3	1		0	0	0		0	1	0
	0	0	0		1	1	2		0	0	0		1	0	0
	0	1	0		1	1	1		0	0	0		1	0	1
	0	0	0		0	0	1		0	0	0		1	2	1
	1	0	1		1	3	0		0	2	0		0	0	0
	0	0	1		2	2	1		0	1	0		0	1	0
	0	0	0		0	1	0		0	0	0		1	1	0
	0	0	0		2	1	0		0	2	0		1	0	0
	1	0	1		0	1	0		0	0	3		0	2	0
	0	1	0		2	0	1		0	0	2		0	0	0
	0	0	0		3	1	0		0	0	1		0	0	2
	0	0	0		2	1	0		0	0	1		0	0	1
	0	0	0		0	2	1		1	1	0		1	0	2
	0	0	1		0	2	3		1	2	0		1	1	1
	0	0	0		0	2	0		1	1	0		1	1	0
	1	0	1		0	0	1		1	1	0		1	0	0
	0	0	0		0	1	0		0	0	0		1	0	0
	0	0	0		1	2	1		0	1	0		1	1	1
	1	0	1		1	1	1		0	1	0		0	1	0
	0	0	0		0	1	0		0	0	0		0	0	0
	0	0	0		1	0	3		0	0	0		0	0	0
	0	1	0		2	0	0		0	0	0		0	0	0
	0	1	0		3	2	1		0	0	0		0	0	1
	0	0	0		0	1	1		2	0	0		2	0	0
	0	0	0		0	1	0		1	0	0		1	0	0
	0	0	0		2	0	0		1	1	0		2	0	0
	0	0	0		0	2	1		0	1	0		1	0	2
	1	2	0		1	1	1		0	0	0		0	0	0
	0	0	0		4	2	0		0	0	1		0	1	0
	0	0	1		2	1	2		0	0	0		0	1	0
	0	0	0		0	1	0		0	0	0		2	0	0
	0	0	0		0	0	1		0	0	0		1	0	0
	0	0	0		0	2	1		0	1	0		1	0	0
	1	0	1		0	2	0		1	1	0		2	0	0
	0	0	0		0	1	0		1	0	0		1	0	0
	0	0	0		0	1	1		0	0	1		2	0	0
	0	0	0		2	0	1		0	0	1		2	4	0
	0	0	0		0	2	0		0	0	0		1	0	1
	0	0	0		0	1	0		0	0	0		1	0	0
	1	0	1		2	2	0		0	1	0		1	0	0
	0	0	0		3	1	1		1	1	0		0	0	0
	1	0	0		3	1	1		1	0	0		0	1	1
	1	0	0		0	1	1		1	0	0		0	1	0
	0	0	0		0	2	0		0	1	0		0	0	0
	0	0	1		1	2	1		0	0	1		1	0	0
	0	0	0		0	1	1		2	0	1		0	1	0
	0	0	0		1	2	0		0	1	1		1	0	2
	0	1	0		0	1	1		0	2	0		2	0	2
	1	0	0		1	2	1		0	2	0		1	1	0
	1	0	0		0	1	0		1	1	2		1	1	0
	1	0	0		2	1	0		0	0	1		1	1	0
	0	0	0		0	1	1		0	0	0		1	0	0
	0	1	0		0	1	2		0	0	0		1	0	2
	0	0	0		0	0	1		0	0	0		1	1	1
	0	0	1		2	3	2		0	0	1		1	0	1
	0	0	0		2	1	0		0	0	2		0	0	0
	0	0	0		0	1	0		0	0	0		0	0	1
	0	1	0		0	1	1		0	0	0		0	0	0
	0	0	0		0	1	0		0	0	0		0	0	0
	0	1	0		1	1	0		0	0	0		3	1	2
	0	0	0		3	1	2		0	0	0		0	1	0
	0	0	0		0	1	1		1	0	1		0	0	0
	0	1	0		3	0	1		0	0	1		2	0	0
	0	0	0		1	0	0		0	0	1		0	1	0
	0	0	0		2	0	0		0	1	0		0	0	1
	0	0	1		2	1	1		0	0	0		0	1	1
	0	0	0		2	1	0		0	0	0		0	1	0
	0	1	0		1	0	1		0	0	0		2	0	1
	1	0	0		2	0	1		0	1	0		1	0	0
	0	0	0		0	1	1		0	0	1		1	0	1
	0	0	0		0	0	1		0	1	0		1	0	0
	0	1	0		0	1	3		0	1	0		0	0	1
	0	0	0		0	1	0		2	0	0		1	0	0
	0	0	1		1	1	0		0	0	0		1	1	2
	1	0	0		0	2	1		1	0	0		0	2	0
	0	0	0		2	1	0		1	1	0		0	0	0
	0	0	0		1	2	2		1	0	1		1	0	1
	0	0	0		1	1	2		0	0	2		0	0	0
	0	1	0		1	1	1		1	1	1		0	1	0
	0	0	0		0	0	1		0	1	1		1	0	0
	0	0	0		2	2	2		0	1	0		3	1	0
	1	1	3		3	1	1		0	0	1		1	0	0
	0	0	1		0	1	1		0	0	0		1	0	0
	0	0	0		1	3	0		0	0	1		0	0	0
	0	0	0		1	1	2		0	0	1		1	0	0
	0	0	0		1	2	0		0	0	0		0	2	0
	0	0	0		1	2	2		0	2	0		0	0	1
	0	0	0		1	1	1		0	1	0		2	2	0
	0	0	0		1	1	0		0	1	0		1	0	1
	1	0	0		1	1	1		2	1	0		0	1	3
	1	1	2		2	1	0		1	0	0		0	4	0
	0	0	0		1	1	1		0	0	1		1	0	1
	0	0	0		0	2	2		0	0	1		1	0	0
	0	0	0		1	1	0		1	0	1		0	6	1
	0	0	0		1	2	0		0	1	0		0	0	1
	0	0	0		2	0	0		0	0	0		0	0	0
	0	0	1		2	3	2		0	1	0		1	0	2
	0	0	1		1	0	0		0	2	1		0	0	0
	0	0	0		3	2	0		0	1	1		0	0	2
	0	0	0		1	4	0		0	0	1		0	0	2
	0	0	1		0	1	0		3	0	0		0	0	0
	0	0	0		2	1	1		1	0	0		0	0	0
	0	0	0		3	1	0		0	0	0		1	0	0
	0	0	0		1	2	1		0	0	1		2	0	0
	0	0	0		1	1	0		0	0	0		2	1	0
	0	0	0		1	1	1		0	3	1		0	0	0
	0	0	0		1	0	0		0	0	1		0	2	3
	1	0	1		2	1	0		0	1	0		0	2	2
	1	0	2		1	1	1		0	0	0		0	0	1
	0	0	2		2	0	1		2	1	0		0	0	3
	0	0	0		1	1	0		0	1	0		0	0	0
	0	0	0		2	1	1		1	0	0		2	0	0
	0	0	0		2	0	1		0	0	0		0	0	0
	0	0	0		1	0	0		1	0	1		0	0	0
	0	0	0		1	1	0		1	0	0		0	2	2
	0	0	1		1	0	0		0	1	1		0	1	1
	0	0	0		1	0	1		0	1	0		0	2	0
	0	0	0		1	1	3		1	0	0		0	0	0
	0	0	0		2	1	0		1	1	1		0	2	0
	1	0	1		1	1	0		0	0	0		0	2	0
	0	0	0		1	1	1		0	0	0		1	2	1
	0	0	0		0	1	0		1	0	0		1	0	1
	0	0	0		0	1	1		0	0	0		1	0	0
	0	0	0		2	1	1		1	0	1		0	0	1
	0	0	2		0	0	0		1	0	1		0	0	0
	0	0	1		2	1	0		0	0	1		0	0	2
	0	0	0		1	1	3		0	1	1		0	0	0
	0	0	0		3	1	0		0	0	0		2	0	1
	0	0	0		2	1	0		1	1	1		1	0	2
	0	0	0		0	0	1		2	0	0		0	0	0
	0	0	2		2	2	0		1	0	0		1	0	0
	0	1	1		1	1	1		1	0	0		0	0	1
	0	0	0		1	0	2		1	0	0		0	0	0
	0	0	0		2	1	1		0	0	0		0	1	0
	0	0	0		1	2	1		1	0	1		2	0	0
	2	0	0		2	2	0		2	0	0		0	0	1
	1	0	1		2	0	0		0	0	0		0	0	1
	2	0	1		1	1	0		1	0	0		0	0	0
	0	0	1		2	2	2		1	0	0		0	0	1
	1	0	0		3	1	1		0	0	0		0	1	0
	1	0	0		2	1	0		1	0	0		0	0	0
	0	0	0		1	1	1		2	2	0		0	0	1
	2	0	0		2	1	0		2	0	0		0	0	1
	1	0	0		1	1	1		2	2	0		0	0	0
	1	1	0		1	1	1		3	0	1		0	0	0
	0	0	0		1	2	0		1	0	1		1	0	0
	1	2	0		2	0	0		0	0	0		0	0	0
	1	0	1		1	2	0		0	0	0		0	0	0
	1	0	4		1	1	2		0	0	1		0	0	0
	1	0	0		2	0	0		0	0	1		0	0	0
	1	0	0		3	0	0		0	0	1		1	2	2
	2	0	0		3	0	2		0	0	0		0	0	0
	2	1	0		1	0	0		0	0	0		0	1	0
	0	1	1		1	2	1		0	0	1		0	1	1
	0	0	0		1	0	0		2	0	1		1	0	1
	1	0	0		1	0	0		0	0	1		0	0	0
	1	2	0		2	3	0		0	0	0		1	0	2
	2	0	0		1	1	2		2	0	0		0	0	0
	0	2	0		1	2	2		2	0	0		1	0	0
	1	0	0		1	1	0		0	0	0		3	0	0
	0	0	0		1	1	1		2	0	0		1	1	0
	1	0	1		0	1	1		0	0	0		1	2	0
	2	0	0		2	2	0		0	1	0		4	1	0
	1	0	0		0	2	0		1	1	0		1	0	0
	0	1	0		2	2	3		1	0	1		1	2	1
	0	0	0		2	0	0		1	0	1		0	0	1
	0	0	1		1	3	0		0	0	0		0	1	0
	0	0	1		1	1	1		0	0	1		0	1	1
	0	0	0		4	1	3		1	0	0		0	0	0
	0	0	0		2	1	0		0	0	0		1	2	0
	1	1	0		1	1	0		2	0	0		0	1	0
	1	1	0		1	1	2		2	0	0		0	0	0
	1	2	0		2	0	1		0	0	0		1	1	1
	1	0	0		2	1	2		2	0	0		0	0	0
	1	1	0		1	0	1		2	0	0		2	1	0
	1	1	0		1	1	2		1	1	2		1	0	0
	1	2	0		2	1	0		1	1	0		0	0	0
	0	2	0		2	1	0		0	0	0		1	2	0
	0	1	0		1	1	3		0	0	0		0	0	0
	1	0	0		1	2	0		0	1	0		1	1	1
	1	0	1		1	2	0		0	2	0		0	0	1
	2	0	1		2	1	2		1	0	0		0	0	0
	1	1	0		1	1	0		1	0	0		0	0	1
	1	0	0		1	3	1		0	1	0		1	0	0
	0	0	0		0	1	2		0	1	0		0	2	0
	0	0	0		0	1	0		1	0	0		1	5	1
	0	0	0		2	0	2		0	0	0		0	0	0
	1	0	0		2	1	1		0	0	0		0	0	0
	1	0	0		1	0	1		1	2	0		0	0	0
	2	1	0		1	1	0		2	0	0		0	0	0
	0	2	0		1	1	0		1	0	0		1	0	0
	1	1	1		1	1	1		1	0	0		0	1	0
	1	1	0		1	2	0		1	0	0		0	0	1
	1	0	1		1	1	3		0	0	2		0	1	0
	1	2	1		1	1	2		0	0	0		2	0	1
	1	1	1		1	1	0		1	1	0		0	0	0
	1	0	0		2	1	0		1	2	0		0	1	0
	0	0	1		2	1	0		0	0	0		0	0	0
	1	1	1		4	1	2		1	0	0		0	0	0
	0	0	0		3	1	0		0	0	0		0	0	0
	2	1	0		2	2	0		0	0	1		0	0	0
	0	1	0		1	1	0		1	2	0		2	1	0
	1	0	0		2	2	1		1	0	0		1	1	2
	0	0	0		0	2	0		1	0	0		2	1	0
	0	0	0		1	0	2		2	0	1			0	0
	2	0	2		1	1	0		0	0	0		0	0	0
	1	1	0		1	1	2		2	1	0		2	0	0
	0	0	0		0	0	2		1	3	0		0	1	0
	0	0	0		1	2	0		0	1	0		1	0	0
	0	0	1		1	2	0		1	0	1		2	0	0
	0	1	0		4	1	2		1	0	0		2	0	0
	1	0	1		2	1	1		0	0	1		3	0	0
	1	0	0		2	1	0		2	2	0		0	0	2
	1	1	0		0	2	0		2	0	0		1	1	1
	1	0	0		1	2	0		2	0	0		1	0	0
	2	0	0		1	1	1		0	0	0		1	0	0
	2	0	0		0	0	0		1	1	0		0	0	1
	0	1	0		0	1	0		1	0	2		0	0	1
	0	1	1		0	0	0		0	1	1		1	6	0
	1	1	1		0	1	1		2	0	1		1	0	1
	0	0	0		0	1	0		0	0	1		0	0	0
	0	1	2		0	2	2		0	0	0		0	0	0
	0	0	2		0	1	1		0	1	0		0	1	0
	1	0	0		2	2	0		0	0	0		0	0	1
	2	0	0		1	2	1		1	0	0		0	0	0
	1	0	0		0	2	0		0	1	1		1	0	0
	0	2	0		4	1	2		0	1	1		1	1	2
	0	2	0		1	0	1		0	0	0		1	0	0
	0	0	0		1	0	1		0	2	0		2	0	1
	0	0	1		1	0	3		0	1	0		0	0	0
	0	0	0		1	2	2		2	0	0		1	0	0
	1	1	0		0	2	0		0	1	0		1	0	0
	0	1	0		1	2	1		0	0	0		0	2	0
	0	0	0		0	1	1		0	0	0		1	0	0
	2	0	2		0	1	0		1	0	0		1	0	1
	1	0	0		2	1	0		0	3	1		0	0	0
	2	0	0		3	2	2		2	1	0		2	0	0
	2	0	0		1	2	0		1	0	0		0	0	0
	1	0	0		2	2	1		2	0	0		0	0	0
	0	0	0		1	0	0		1	0	0		1	0	0
	0	0	0		4	0	2		0	1	1		0	0	0
	0	1	1		5	1	1		3	1	1		1	0	0
	0	0	0		1	2	1		0	0	1		0	0	0
	0	0	0		0	1	0		0	1	0		1	1	1
	0	0	0		1	4	0		1	0	0		0	0	1
	2	0	0		1	0	3		0	0	0		0	0	0
	0	1	0		2	1	1		0	0	0		0	0	0
	0	1	0		1	1	1		1	0	0		0	1	0
	2	0	2		2	1	0		3	0	0		0	0	0
	1	0	0		1	1	2		1	0	0		0	0	0
	1	0	1		0	1	0		1	0	0		0	0	1
	1	0	0		1	2	2		1	0	0		1	0	1
	0	1	2		2	1	1		2	1	0		2	0	1
	0	0	1		3	0	3		0	1	0		2	0	2
	0	0	0		1	0	0		0	1	0		1	2	0
	0	1	0		1	2	0		0	0	0		1	1	2
	1	0	0		1	3	0		0	1	0		0	0	2
	1	0	0		2	1	1		0	0	0		0	0	2
	0	0	0		0	0	1		0	0	2		0	0	0
	2	0	1		1	1	0		0	0	0		0	0	0
	1	0	2		1	1	1		0	1	0		0	1	0
	1	1	0		0	2	0		0	1	0		0	0	0
	2	1	0		1	0	1		1	1	0		0	0	0
	1	0	0		1	1	3		1	0	0		2	0	0
	1	0	0		1	1	0		0	0	1		0	1	0
	0	0	0		1	1	2		0	0	1		0	0	2
	0	0	0		1	2	1		0	1	1		0	1	2
	0	0	0		2	2	1		0	1	1		0	1	0
	0	0	1		0	1	2		0	0	0		0	2	0
	0	0	1		1	1	1		0	0	0		0	1	1
	0	0	0		2	2	2		0	0	0		0	0	1
	0	0	5		1	1	0		0	0	0		2	0	0
	0	0	3		1	2	0		1	0	0		0	0	0
	0	0	2		2	1	2		0	0	1		3	0	0
	0	0	0		2	1	0		0	0	0		1	0	0
	0	0	0		1	1	3		0	0	0		0	0	0
	0	0	0		3	1	2		0	2	0		0	0	2
	0	0	0		1	3	1		0	0	1		1	0	0
	0	0	0		1	2	2		0	0	0		0	2	0
	0	1	1		1	1	1		0	0	0		1	0	0
	0	0	1		1	1	2		0	0	0		0	1	1
	0	0	0		1	0	2		1	0	0		1	0	1
	0	1	0		1	1	0		0	1	0		0	0	0
	0	0	1		3	0	2		0	1	0		1	0	0
	0	1	0		1	1	2		0	1	0		0	0	0
	0	0	1		3	2	1		0	0	0		0	2	1
	0	0	0		0	2	1		0	0	1		0	0	1
	0	0	1		1	3	2		0	2	0		2	0	1
	0	1	1		2	1	2		1	2	0		0	0	0
	0	0	1		2	2	2		0	1	0		0	0	0
	0	0	3		2	0	4		0	0	0		1	0	2
	0	0	0		1	0	2		1	0	0		0	2	1
	0	0	0		1	2	2		0	0	0		1	0	0
	1	0	0		1	2	1		0	0	0		1	0	0
	2	0	0		1	2	0		0	2	0		0	0	0
	1	0	0		1	1	0		0	2	0		0	1	1
	0	0	0		2	0	0		2	0	1		1	1	0
	2	0	0		1	1	0		0	0	2		1	2	2
	2	0	0		1	1	2		0	1	0		0	0	1
	1	0	0		0	1	1		0	0	0		0	1	1
	0	0	0		1	2	0		1	2	0		1	0	0
	2	1	2		1	1	2		0	0	0		1	3	1
	1	0	2		1	1	2		0	0	0		0	2	0
	1	1	1		2	1	1		0	0	0		4	0	2
	2	1	2		0	0	1		1	1	0		0	0	0
	1	1	0		1	0	1		0	0	0		2	0	0
	0	0	0		2	2	2		1	2	0		2	0	0
	1	0	0		0	1	0		0	0	0		0	0	0
	0	0	0		0	1	1		1	1	0		0	1	0
	1	0	0		1	2	0		0	1	0		0	0	0
	1	1	0		1	1	2		0	3	1		0	0	0
	0	0	0		1	1	3		0	0	0		0	0	0
	1	0	0		2	1	1		0	0	0		0	2	0
	1	2	1		1	1	0		0	0	0		2	3	1
	0	0	0		1	1	1		0	1	0		0	0	0
	0	0	1		2	0	2		0	0	0		0	0	0
	0	0	2		0	3	0		1	2	0		0	0	0
	0	0	1		2	1	0		1	1	1		0	0	0
	0	0	1		0	1	3		1	0	1		0	0	0
	0	0	0		2	1	2		0	0	1		0	0	0
	0	0	0		1	2	4		1	0	0		2	1	0
	0	0	0		1	2	0		1	0	0		0	0	2
	1	1	0		2	0	1		0	1	0		0	0	1
	0	0	0		1	1	0		1	1	0		0	0	0
	0	0	1		3	2	2		2	1	0		3	1	1
	2	0	0		1	0	0		2	0	0		0	0	1
	0	1	0		2	1	0		2	0	0		0	0	1
	0	0	1		1	3	0		1	0	0		0	1	0
	0	0	0		1	2	1		2	1	0		0	0	1
	2	2	0		1	2	0		0	0	0		0	0	0
	0	0	0		1	1	0		0	1	0		2	0	1
	0	1	1		1	2	1		1	1	0		2	0	2
	0	0	0		1	0	0		1	1	0		0	0	1
	0	0	1		3	0	4		1	1	0		1	0	0
	2	3	0		1	0	0		2	0	0		0	0	0
	1	0	2		1	2	1		2	0	0		0	0	0
	1	2	0		2	2	0		0	0	0		1	2	1
	0	0	0		2	2	2		2	0	0		0	0	0
	1	0	0		2	1	1		0	1	1		2	1	4
	2	2	0		1	0	1		2	1	0		0	0	0
	2	1	1		1	0	0		1	1	1		0	0	0
	1	0	1		1	1	2		0	0	1		0	0	1
	0	0	1		1	2	3		0	0	0		1	0	0
	0	0	2		1	1	3		1	0	0		1	0	0
	3	0	1		1	0	0		0	0	1		0	0	0
	2	0	1		2	0	1		1	1	1		0	2	0
	0	0	0		1	1	3		0	0	0		0	1	0
	0	0	2		1	1	0		0	0	0		0	0	1
	0	1	1		1	1	0		0	1	0		0	0	0
	0	1	0		1	1	0		0	1	1		0	0	0
	2	2	1		1	1	0		2	0	1		2	0	1
	1	1	1		1	1	2		0	0	1		0	0	0
	1	2	1		0	1	1		1	2	0		0	1	0
	0	0	1		0	2	3		0	2	0		0	0	0
	0	1	1		1	2	1		1	1	0		0	0	1
	0	0	1		1	1	1		1	0	0		1	0	0
	0	0	1		1	1	0		2	0	0		0	1	0
	0	1	1		3	0	0		0	0	1		1	0	1
	3	1	1		1	1	0		0	0	0		0	0	1
	0	0	0		1	1	1		0	1	0		1	3	0
	0	0	0		2	1	0		0	3	1		1	1	1
	0	0	0		0	2	0		1	1	1		0	1	0
	1	0	1		2	1	2		1	1	0		0	0	0
	0	1	0		1	1	0		0	0	0		0	0	0
	0	1	0		1	1	0		1	1	0		0	0	1
	1	0	0		0	1	3		1	0	0		1	0	0
	0	0	0		4	1	0		0	3	0		0	0	0
	2	0	0		1	1	1		1	0	0		1	2	0
	0	1	0		0	1	0		0	1	0		0	0	2
	0	0	0		0	1	0		0	0	0		0	1	1
	2	1	0		1	2	1		1	0	0		1	2	0
	1	0	0		0	1	2		0	1	0		0	0	0
	1	0	0		0	2	0		0	0	0		2	0	0
	0	1	0		0	1	2		1	2	0		0	1	0
	0	0	0		1	1	1		0	0	0		0	2	0
	1	0	0		0	2	0		0	0	0		0	0	3
	3	1	0		1	1	1		0	0	0		0	0	0
	0	1	0		4	0	0		0	0	0		1	0	0
	0	1	0		0	2	0		1	0	0		0	0	0
	1	0	1		0	2	2		1	0	0		0	0	0
	0	0	1		0	1	0		2	1	0		0	0	0
	1	1	1		2	3	2		1	1	1		0	0	0
	0	0	1		0	0	1		1	0	1		0	0	0
	1	0	1		0	1	1		1	2	1		0	0	0
	1	0	1		0	1	1		3	1	1		1	2	2
	0	0	0		2	2	0		0	1	0		0	0	1
	0	0	0		1	1	1		0	0	0		0	0	0
	0	1	1		3	1	2		0	0	1		0	0	0
	2	0	0		4	1	2		0	0	0		0	0	0
	0	0	1		2	1	1		0	0	0		2	0	1
	0	0	1		4	0	1		0	1	0		1	0	1
	0	0	0		1	1	2		3	0	0		0	0	1
	0	0	0		2	2	2		0	1	0		0	1	0
	0	2	1		1	1	3		2	0	0		0	1	0
	0	0	1		1	2	1		2	0	1		0	4	0
	0	0	1		2	2	1		0	0	1		2	0	1
	0	1	1		1	2	0		1	0	1		0	0	2
	0	0	1		2	1	0		0	0	0		0	0	0
	0	0	0		2	3	1		1	0	1		0	1	0
	1	0	0		3	1	2		0	0	1		0	2	0
	0	0	0		0	2	1		0	1	0		0	3	1
	0	0	0		1	1	2		0	0	0		0	0	0
	2	1	0		2	2	2		0	0	0		1	0	0
	0	0	1		2	1	1		1	0	1		0	1	0
	1	0	0		0	0	2		2	0	1		1	0	1
	1	0	0		2	0	2		0	1	0		0	0	0
	1	1	1		0	0	1		1	0	0		0	1	0
	0	1	1		1	1	1		2	0	0		1	0	0
	0	0	0		0	2	2		0	1	0		0	0	0
	1	0	0		0	2	1		1	0	1		0	0	1
	0	0	1		0	0	3		1	1	1		0	0	0
	0	1	0		0	1	1		1	0	0		2	0	0
	0	1	0		0	1	2		0	0	0		1	0	0
	0	0	0		1	1	0		1	0	0		1	0	0
	1	0	0		0	2	0		0	1	0		1	0	0
	0	0	1		0	1	1		0	1	0		0	0	0
	0	1	0		0	1	1		0	1	1		0	0	0
	0	1	0		1	0	2		3	3	1		1	1	2
	1	0	0		1	1	2		3	0	0		0	0	1
	0	0	0		0	1	2		0	1	0		1	2	0
	0	1	1		0	1	2		1	0	2		0	0	1
	0	0	1		4	1	2		0	2	0		1	2	1
	0	0	0		2	0	1		0	1	0		0	0	0
	0	1	0		2	1	1		0	2	0		0	1	0
	0	0	3		2	0	1		0	1	0		1	1	0
	1	0	0		1	0	1		0	1	1		0	1	1
	2	0	0		3	1	0		1	0	0		0	0	2
	0	1	0		0	1	0		0	2	0		1	0	2
	1	0	0		0	0	0		0	1	0		0	0	1
	0	0	0		1	2	1		1	2	0		2	0	0
	0	2	0		1	1	1		0	0	0		0	0	0
	0	0	2		1	0	4		0	0	2		0	0	1
	0	2	1		1	1	1		4	0	0		0	1	0
	0	0	0		2	1	1		0	0	0		0	0	0
	0	1	0		2	1	1		0	0	1		2	0	1
	0	1	0		0	1	2		1	0	0		0	0	0
	2	1	0		0	1	1		0	0	1		0	1	1
	1	2	0		1	1	2		0	0	1		1	0	1
	0	1	0		1	1	1		1	0	1		0	0	0
	0	0	0		1	1	2		0	0	0		0	0	0
	2	0	0		0	0	0		0	2	0		1	0	0
	0	0	0		0	0	2		0	0	0		0	0	0
	0	0	0		0	0	0		0	2	0		0	0	0
	1	0	1		2	0	3		0	0	1		1	0	1
	2	0	1		1	2	1		0	0	0		3	0	1
	0	0	0		2	3	0		0	0	0		1	0	1
	0	0	0		0	1	0		0	0	0		1	1	2
	0	2	1		1	0	2		0	0	1		0	0	0
	0	1	0		1	0	0		1	1	1		1	2	0
	1	0	1		1	0	1		0	2	1		0	2	0
	0	1	0		1	0	1		0	0	1		0	0	0
	1	0	0		1	1	2		2	0	0		2	0	0
	1	0	0		0	1	1		1	0	0		1	0	0
	0	4	0		2	2	1		1	0	0		0	0	0
	0	0	0		1	1	0		1	0	0		0	0	1
	0	2	0		2	1	0		2	1	0		1	0	0
	0	0	0		0	1	1		1	1	0		1	2	0
	0	1	0		1	1	2		0	0	0		0	1	1
	1	0	0		1	1	2		0	0	0		0	2	0
	1	0	1		1	1	0		0	1	1		0	0	0
	1	0	0		2	2	3		0	0	1		1	0	0
	0	0	2		0	1	1		0	1	1		0	0	0
	0	0	0		4	2	0		0	1	1		2	1	1
	0	0	0		0	1	0		0	0	0		1	0	0
	0	0	0		4	1	3		2	0	0		0	0	0
	0	0	0		3	3	0		0	0	1		0	0	0
	0	0	0		1	0	1		0	0	1		0	0	1
	0	2	1		1	1	0		0	0	1		0	0	1
	0	2	1		0	2	1		1	1	0		2	0	0
	0	2	0		1	1	2		0	1	0		0	0	0
	0	3	0		1	2	2		0	1	0		0	0	0
	0	0	2		1	1	1		1	2	0		0	2	0
	0	0	0		0	1	2		2	0	0		0	1	0
	0	1	2		2	1	1		0	1	1		0	0	0
	0	1	0		1	1	0		0	0	1		0	1	1
	0	0	0		1	2	1		0	1	1		1	1	2
	0	0	0		2	2	2		0	0	0		0	0	1
	0	0	0		1	1	1		0	2	1		1	0	2
	1	0	0		1	1	2		0	1	1		0	0	1
	0	0	1		1	1	1		0	0	1		0	1	0
	0	2	0		2	1	2		0	1	0		1	2	0
	0	1	0		1	0	1		0	0	0		0	2	0
	0	2	0		1	0	2		0	0	0		0	1	0
	0	1	0		0	2	0		0	0	0		1	0	1
	1	0	0		0	1	2		1	0	0		0	0	1
	2	0	1		0	0	1		0	0	0		0	1	1
	0	2	1		2	0	1		1	2	0		1	0	0
			2		1	0	2		0	0	0		0		0
			0		1	0	0		0	3	1		2
			1		4	1	3		0	0	0
			1		4	1	0		1	0	0
			2		2	0	1		0	0	0
			2		0	0	1		1	1	0
			1		0	0	1		0	1	0
			0		0		2		1	1	1
			0		0		4		2	1	1
			0		0		1		0	1	0
			1		0		1		2	1	0
			0		1		3		2	1	0
					1		2		1	2	0
					1		1		0	0	0
					1				0	1	2
					0				0	0	2
					1				0	1	0
					3				1	0	0
					2				1	0	0
					2				1	1	0
					0				0	1
					2				3	0
					2				2	3
					1				0	1
					2				0	1
					2				0	0
					2				1	1
					2				1	1
					2				0	1
					0				0	0
					4				0	0
					1				1	1
					1				2
					1				0
					0				0
					2				0
					3				0
					0				2
					1				2
					0				0
					1				1
					1				0
					0				0
					0				0
					1				0
					1				1
					2				0
					2				0
					0				2
					0				1
					1				0
					0				1
					1				0
					2				0
					1				0
					0				2
					1				0
					3				1
					0				0
					1				0
					2				0
					1				0
					2				0
					3				0
					2				1
					3				1
					1				0
					1				0
					0				0
					2				0
					2				2
					1				0
					0				3
					2				2
					0				0
					1				0
					1				1
					1				1
					0				0
					0				0
					0				1
					0				1
					0				1
					3				2
					4				1
					2				1
									0
									0
									0
									0
									0
									0
									0
									0
									0
									0
									2
									0
									1
									0
									1
									1
	0.434	0.346	0.386719	#DIV/0!	1.17577	1.08876	0.951362		0.534884	0.484962	0.309615	#DIV/0!	0.538922	0.448	0.439122
