# Supplementary material for: Essential roles of Caspase-3 in facilitating Myc-induced genetic instability and carcinogenesis
Source: eLife journal article supplement (doi:10.7554/elife.26371), 2017-07-10
Supplement: supp [file elife_poa_e26371_Fig.1_source_data_6.xlsx]

## Sheet: Sheet1
	Time post irradiation (3 Gy)		0			15			30			60			120			240
MCF10A	22	103	21.3592	100	111	90.0901	36	63	57.1429	73	147	49.6599	39	124	31.4516	56	154	36.3636
	37	147	25.1701	77	93	82.7957	67	80	83.75	45	92	48.913	48	132	36.3636	69	188	36.7021
	35	193	18.1347	137	145	94.4828	55	66	83.3333	42	96	43.75	33	79	41.7722	50	137	36.4964
	27	133	20.3008	93	104	89.4231	43	61	70.4918	67	141	47.5177	63	155	40.6452	46	134	34.3284
	24	104	23.0769	163	172	94.7674	134	163	82.2086	58	133	43.609	51	135	37.7778	52	142	36.6197
MCF10A Myc	77	117	65.812	115	124	92.7419	93	101	92.0792	99	122	81.1475	126	163	77.3006	113	151	74.8344
	89	133	66.9173	156	158	98.7342	89	93	95.6989	108	137	78.8321	111	148	75	104	139	74.8201
	90	136	66.1765	146	146	100	133	146	91.0959	151	166	90.9639	125	163	76.6871	106	142	74.6479
	69	112	61.6071	87	88	98.8636	159	167	95.2096	97	115	84.3478	113	142	79.5775	110	138	79.7101
	79	126	62.6984	92	93	98.9247	111	127	87.4016	140	156	89.7436	100	134	74.6269	115	156	73.7179
Casp3 KO	31	155	20	77	87	88.5057	92	141	65.2482	55	112	49.1071	36	103	34.9515	42	126	33.3333
	27	146	18.4932	96	102	94.1176	43	67	64.1791	51	131	38.9313	36	97	37.1134	41	128	32.0312
	40	145	27.5862	56	63	88.8889	49	73	67.1233	48	125	38.4	30	86	34.8837	40	115	34.7826
	24	107	22.4299	95	107	88.785	50	79	63.2911	54	146	36.9863	33	83	39.759	38	113	33.6283
	26	122	21.3115	120	146	82.1918	62	97	63.9175	46	113	40.708	32	92	34.7826	45	117	38.4615
Casp3 KO Myc	18	100	18	121	134	90.2985	84	107	78.5047	85	144	59.0278	45	97	46.3918	49	124	39.5161
	24	107	22.4299	127	142	89.4366	80	103	77.6699	83	153	54.2484	36	80	45	51	134	38.0597
	28	127	22.0472	115	122	94.2623	95	122	77.8689	67	127	52.7559	60	133	45.1128	51	97	52.5773
	37	133	27.8195	112	142	78.8732	89	118	75.4237	68	138	49.2754	60	145	41.3793	46	103	44.6602
	30	152	19.7368	91	102	89.2157	104	135	77.037	64	120	53.3333	50	106	47.1698	42	115	36.5217
Fraction of gammaH2AX positive cells
	0	15	30	60	120	240
	21.3592	90.0901	57.1429	49.6599	31.4516	36.3636
	25.1701	82.7957	83.75	48.913	36.3636	36.7021
	18.1347	94.4828	83.3333	43.75	41.7722	36.4964
	20.3008	89.4231	70.4918	47.5177	40.6452	34.3284
	23.0769	94.7674	82.2086	43.609	37.7778	36.6197
	21.6083	90.3118	75.3853	46.6899	37.6021	36.102
	2.67771	4.86262	11.5805	2.85408	4.06333	0.999745
	65.812	92.7419	92.0792	81.1475	77.3006	74.8344
	66.9173	98.7342	95.6989	78.8321	75	74.8201
	66.1765	100	91.0959	90.9639	76.6871	74.6479
	61.6071	98.8636	95.2096	84.3478	79.5775	79.7101		Fraction of gammaH2AX positive cells, Summary of Averages
	62.6984	98.9247	87.4016	89.7436	74.6269	73.7179				0	15	30	60	120	240
	64.6423	97.8529	92.297	85.007	76.6384	75.5461			MCF10A	21.6083	90.3118	75.3853	46.6899	37.6021	36.102
	2.33924	2.90168	3.37311	5.2768	1.98807	2.37285			MCF10A Myc	64.6423	97.8529	92.297	85.007	76.6384	75.5461
									Casp3 KO	21.9641	88.4978	64.7519	40.8265	36.298	34.4474
	20	88.5057	65.2482	49.1071	34.9515	33.3333			Casp3 KO Myc	22.0067	88.4173	77.3008	53.7281	45.0107	42.267
	18.4932	94.1176	64.1791	38.9313	37.1134	32.0312
	27.5862	88.8889	67.1233	38.4	34.8837	34.7826
	22.4299	88.785	63.2911	36.9863	39.759	33.6283
	21.3115	82.1918	63.9175	40.708	34.7826	38.4615
	21.9641	88.4978	64.7519	40.8265	36.298	34.4474
	3.46973	4.23037	1.50232	4.8169	2.16526	2.44824			SEM	2.67771	4.86262	11.5805	2.85408	4.06333	0.999745
										2.33924	2.90168	3.37311	5.2768	1.98807	2.37285
	18	90.2985	78.5047	59.0278	46.3918	39.5161				3.46973	4.23037	1.50232	4.8169	2.16526	2.44824
	22.4299	89.4366	77.6699	54.2484	45	38.0597				3.71402	5.71114	1.17273	3.51017	2.22298	6.52508
	22.0472	94.2623	77.8689	52.7559	45.1128	52.5773
	27.8195	78.8732	75.4237	49.2754	41.3793	44.6602
	19.7368	89.2157	77.037	53.3333	47.1698	36.5217
	22.0067	88.4173	77.3008	53.7281	45.0107	42.267
	3.71402	5.71114	1.17273	3.51017	2.22298	6.52508
