# Supplementary material for: Essential roles of Caspase-3 in facilitating Myc-induced genetic instability and carcinogenesis
Source: eLife journal article supplement (doi:10.7554/elife.26371), 2017-07-10
Supplement: supp [file elife_poa_e26371_Fig.1_source_data_7.xlsx]

## Sheet: Sheet1
Cell line	Casp3KO +C3				Casp3KO+C3+Myc				Caspase 3 KO				Casp3 Myc				Caspase 3 KO				Casp3 Myc				Casp3KO +C3				Casp3KO+C3+Myc
gH2AX per cell	0	0	0		5	0	6		0	0	0		0	1	0		0.534884	0.484962	0.309615		0.538922	0.448	0.439122		0.618868	0.460922	0.517375		1.11881	1.12407	1.05063
	1	0	1		0	0	8		0	0	0		0	1	0	Average	0.443154				0.475348				0.532388				1.09784
	0	0	1		2	0	2		1	1	0		0	0	0	Standard Dev	0.118311				0.0552355				0.0800362				0.0409653
	0	0	0		0	2	0		1	0	0		1	0	1	SEM	0.0683067	0	0		0.0318902	0	0		0.0462089	0	0		0.0236513	0	0
	0	1	0		0	2	2		0	0	0		0	0	0
	0	0	4		1	1	0		0	2	1		0	0	1
	0	0	0		0	0	0		1	0	0		1	1	0
	0	0	0		0	2	0		1	0	0		1	0	0
	2	1	0		0	4	0		1	0	1		1	1	0
	0	0	1		0	1	4		0	0	1		1	0	0
	0	1	2		4	6	2		1	1	1		2	0	0
	2	0	0		1	0	0		1	2	1		1	0	1
	2	4	1		4	0	0		0	3	0		1	0	0
	2	0	0		7	0	2		0	0	0		0	1	0
	1	0	2		3	0	1		0	0	0		1	0	0
	0	0	2		2	0	1		0	0	0		1	0	1
	2	0	0		1	0	0		0	0	0		1	2	1
	0	2	0		0	8	1		0	2	0		0	0	0
	0	0	0		0	0	1		0	1	0		0	1	0
	0	0	1		0	2	1		0	0	0		1	1	0
	0	0	0		0	4	0		0	2	0		1	0	0
	0	2	1		0	4	0		0	0	3		0	2	0
	0	2	0		0	4	0		0	0	2		0	0	0
	0	1	1		1	2	0		0	0	1		0	0	2
	0	0	5		1	3	1		0	0	1		0	0	1
	0	0	1		3	0	3		1	1	0		1	0	2
	2	1	2		6	4	4		1	2	0		1	1	1
	1	0	0		6	2	4		1	1	0		1	1	0
	2	1	0		2	2	0		1	1	0		1	0	0
	0	0	0		1	0	5		0	0	0		1	0	0
	0	0	0		1	0	0		0	1	0		1	1	1
	0	0	1		1	0	0		0	1	0		0	1	0
	0	0	0		0	2	1		0	0	0		0	0	0
	0	0	1		0	2	1		0	0	0		0	0	0
	1	0	0		0	0	2		0	0	0		0	0	0
	0	0	0		0	0	3		0	0	0		0	0	1
	0	0	0		0	0	2		2	0	0		2	0	0
	0	0	0		0	5	0		1	0	0		1	0	0
	2	1	0		1	0	0		1	1	0		2	0	0
	1	0	0		0	3	5		0	1	0		1	0	2
	0	1	2		0	0	0		0	0	0		0	0	0
	0	0	2		0	2	0		0	0	1		0	1	0
	0	1	1		0	1	0		0	0	0		0	1	0
	0	1	0		0	0	0		0	0	0		2	0	0
	0	3	0		0	0	2		0	0	0		1	0	0
	1	0	4		1	3	1		0	1	0		1	0	0
	1	0	0		0	2	0		1	1	0		2	0	0
	0	0	0		0	0	1		1	0	0		1	0	0
	0	0	0		0	1	3		0	0	1		2	0	0
	0	0	0		3	0	0		0	0	1		2	4	0
	1	0	0		2	0	0		0	0	0		1	0	1
	2	1	1		2	0	0		0	0	0		1	0	0
	0	0	2		2	0	1		0	1	0		1	0	0
	0	0	0		3	3	2		1	1	0		0	0	0
	0	0	1		0	0	2		1	0	0		0	1	1
	0	0	2		0	3	1		1	0	0		0	1	0
	2	4	2		0	0	2		0	1	0		0	0	0
	0	2	1		0	4	2		0	0	1		1	0	0
	0	0	0		0	0	0		2	0	1		0	1	0
	0	0	0		0	0	1		0	1	1		1	0	2
	0	0	0		0	3	2		0	2	0		2	0	2
	0	0	0		2	1	2		0	2	0		1	1	0
	1	2	0		0	4	0		1	1	2		1	1	0
	0	2	2		0	2	0		0	0	1		1	1	0
	0	0	1		1	6	0		0	0	0		1	0	0
	0	0	4		1	0	2		0	0	0		1	0	2
	0	0	5		0	2	0		0	0	0		1	1	1
	0	0	1		0	0	0		0	0	1		1	0	1
	0	2	1		2	2	0		0	0	2		0	0	0
	1	0	1		0	1	7		0	0	0		0	0	1
	2	2	2		0	1	0		0	0	0		0	0	0
	0	2	0		0	0	0		0	0	0		0	0	0
	1	0	2		0	0	2		0	0	0		3	1	2
	1	2	4		0	0	0		0	0	0		0	1	0
	4	0	2		1	3	0		1	0	1		0	0	0
	0	0	4		0	3	0		0	0	1		2	0	0
	0	0	0		2	0	0		0	0	1		0	1	0
	0	0	0		2	2	2		0	1	0		0	0	1
	0	4	0		4	1	0		0	0	0		0	1	1
	1	0	1		1	4	2		0	0	0		0	1	0
	0	0	0		0	1	1		0	0	0		2	0	1
	0	0	0		2	1	4		0	1	0		1	0	0
	1	1	0		2	0	0		0	0	1		1	0	1
	7	2	1		2	0	0		0	1	0		1	0	0
	2	0	0		1	2	0		0	1	0		0	0	1
	4	2	0		0	2	0		2	0	0		1	0	0
	0	4	1		3	3	5		0	0	0		1	1	2
	0	0	0		0	2	0		1	0	0		0	2	0
	0	4	0		0	0	0		1	1	0		0	0	0
	0	3	1		1	1	2		1	0	1		1	0	1
	0	0	0		3	0	0		0	0	2		0	0	0
	0	0	1		3	1	2		1	1	1		0	1	0
	0	0	1		2	2	2		0	1	1		1	0	0
	1	0	0		1	3	0		0	1	0		3	1	0
	0	0	0		2	0	2		0	0	1		1	0	0
	0	0	0		2	0	0		0	0	0		1	0	0
	0	0	0		2	0	0		0	0	1		0	0	0
	2	0	0		3	2	0		0	0	1		1	0	0
	1	2	0		0	0	0		0	0	0		0	2	0
	0	0	1		0	2	0		0	2	0		0	0	1
	0	0	0		2	0	0		0	1	0		2	2	0
	0	2	0		2	0	0		0	1	0		1	0	1
	0	0	1		4	0	0		2	1	0		0	1	3
	0	0	1		2	1	2		1	0	0		0	4	0
	0	0	0		2	2	0		0	0	1		1	0	1
	0	0	0		2	0	0		0	0	1		1	0	0
	0		2		1	1	2		1	0	1		0	6	1
	0	2	1		1	1	0		0	1	0		0	0	1
	2	1	0		1	2	3		0	0	0		0	0	0
	5	1	0		0	1	4		0	1	0		1	0	2
	0	2	2		0	3	0		0	2	1		0	0	0
	0	4	1		1	0	0		0	1	1		0	0	2
	0	2	0		1	0	1		0	0	1		0	0	2
	2	0	0		1	0	0		3	0	0		0	0	0
	2	0	1		0	0	1		1	0	0		0	0	0
	0	0	0		0	2	0		0	0	0		1	0	0
	0	0	2		1	2	0		0	0	1		2	0	0
	0	0	0		0	3	0		0	0	0		2	1	0
	4	0	1		0	2	1		0	3	1		0	0	0
	0	0	1		0	0	0		0	0	1		0	2	3
	0	0	0		0	0	1		0	1	0		0	2	2
	1	0	0		2	0	0		0	0	0		0	0	1
	1	2	0		0	0	1		2	1	0		0	0	3
	0	1	2		0	1	1		0	1	0		0	0	0
	2	0	0		0	2	2		1	0	0		2	0	0
	0	0	0		0	0	0		0	0	0		0	0	0
	0	2	0		0	3	1		1	0	1		0	0	0
	0	0	2		1	0	0		1	0	0		0	2	2
	0	0	2		0	1	1		0	1	1		0	1	1
	0	0	0		0	2	1		0	1	0		0	2	0
	0	0	1		0	0	4		1	0	0		0	0	0
	0	0	0		0	3	1		1	1	1		0	2	0
	0	0	0		1	3	0		0	0	0		0	2	0
	0	0	0		2	0	0		0	0	0		1	2	1
	2	0	0		0	1	0		1	0	0		1	0	1
	0	0	3		1	1	0		0	0	0		1	0	0
	0	0	0		4	2	0		1	0	1		0	0	1
	0	0	0		1	4	0		1	0	1		0	0	0
	0	0	0		1	0	0		0	0	1		0	0	2
	0	0	0		0	1	0		0	1	1		0	0	0
	0	1	2		0	3	0		0	0	0		2	0	1
	0	4	1		2	3	0		1	1	1		1	0	2
	0	1	0		0	1	0		2	0	0		0	0	0
	0	1	0		0	1	0		1	0	0		1	0	0
	0	0	0		3	1	0		1	0	0		0	0	1
	0	0	1		3	4	1		1	0	0		0	0	0
	0	0	1		2	0	1		0	0	0		0	1	0
	0	0	2		4	2	0		1	0	1		2	0	0
	1	1	1		0	1	0		2	0	0		0	0	1
	0	0	0		0	1	1		0	0	0		0	0	1
	0	0	0		4	0	0		1	0	0		0	0	0
	0	4	2		0	0	0		1	0	0		0	0	1
	3	0	0		0	0	0		0	0	0		0	1	0
	4	2	1		0	4	1		1	0	0		0	0	0
	0	0	0		2	0	3		2	2	0		0	0	1
	2	1	0		1	0	0		2	0	0		0	0	1
	0	0	0		4	2	1		2	2	0		0	0	0
	0	0	0		6	2	0		3	0	1		0	0	0
	0	2	0		0	0	0		1	0	1		1	0	0
	0	0	0		0	1	2		0	0	0		0	0	0
	0	0	0		4	0	2		0	0	0		0	0	0
	0	2	0		2	2	3		0	0	1		0	0	0
	0	0	0		2	0	3		0	0	1		0	0	0
	2	0	0		2	0	0		0	0	1		1	2	2
	0	1	1		2	0	1		0	0	0		0	0	0
	1	0	0		2	0	2		0	0	0		0	1	0
	0	0	0		0	3	4		0	0	1		0	1	1
	0	0	0		0	2	3		2	0	1		1	0	1
	0	0	2		0	2	0		0	0	1		0	0	0
	0	0	2		4	2	2		0	0	0		1	0	2
	0	0	0		4	0	2		2	0	0		0	0	0
	0	3	0		0	0	0		2	0	0		1	0	0
	0	0	2		0	0	0		0	0	0		3	0	0
	0	0	2		0	1	0		2	0	0		1	1	0
	0	0	2		0	0	0		0	0	0		1	2	0
	0	0	2		0	0	0		0	1	0		4	1	0
	4	2	0		2	3	1		1	1	0		1	0	0
	0	1	1		0	3	1		1	0	1		1	2	1
	2	2	0		0	4	0		1	0	1		0	0	1
	0	2	0		0	1	0		0	0	0		0	1	0
	0	0	1		0	0	1		0	0	1		0	1	1
	0	0	1		4	0	0		1	0	0		0	0	0
	2	0	1		2	0	2		0	0	0		1	2	0
	1	2	2		0	0	3		2	0	0		0	1	0
	0	4	0		1	0	0		2	0	0		0	0	0
	0	0	1		2	1	3		0	0	0		1	1	1
	2	2	1		0	2	0		2	0	0		0	0	0
	0	1	0		3	1	0		2	0	0		2	1	0
	1	1	0		2	0	0		1	1	2		1	0	0
	0	0	0		0	0	2		1	1	0		0	0	0
	1	0	0		4	0	4		0	0	0		1	2	0
	1	2	2		2	0	0		0	0	0		0	0	0
	1	0	0		3	2	3		0	1	0		1	1	1
	1	0	0		0	3	2		0	2	0		0	0	1
	1	0	0		2	0	2		1	0	0		0	0	0
	0	0	0		0	0	3		1	0	0		0	0	1
	0	0	0		0	0	0		0	1	0		1	0	0
	0	0	1		2	0	2		0	1	0		0	2	0
	0	0	1		5	2	2		1	0	0		1	5	1
	0	0	0		0	0	2		0	0	0		0	0	0
	0	0	0		0	2	1		0	0	0		0	0	0
	0	0	0		4	2	0		1	2	0		0	0	0
	0	0	1		4	3	2		2	0	0		0	0	0
	0	0	1		3	2	3		1	0	0		1	0	0
	0	1	0		0	1	0		1	0	0		0	1	0
	0	1	0		2	2	0		1	0	0		0	0	1
	0	0	0		0	2	0		0	0	2		0	1	0
	0	0	0		0	3	0		0	0	0		2	0	1
	0	0	0		3	2	0		1	1	0		0	0	0
	0	0	0		0	0	0		1	2	0		0	1	0
	2	2	0		0	0	0		0	0	0		0	0	0
	0	0	0		0	1	0		1	0	0		0	0	0
	0	0	0		0	2	0		0	0	0		0	0	0
	1	0	0		1	0	2		0	0	1		0	0	0
	1	0	1		2	4	0		1	2	0		2	1	0
	0	0	1		2	4	0		1	0	0		1	1	2
	0	0	1		4	2	1		1	0	0		2	1	0
	0	0	0		2	0	1		2	0	1			0	0
	0	0	0		0	0	0		0	0	0		0	0	0
	0	0	0		4	2	0		2	1	0		2	0	0
	0	2	0		0	2	2		1	3	0		0	1	0
	0	0	0		2	0	0		0	1	0		1	0	0
	3	0	0		1	2	0		1	0	1		2	0	0
	0	0	0		1	1	0		1	0	0		2	0	0
	0	0	0		0	4	0		0	0	1		3	0	0
	2	0	1		2	2	0		2	2	0		0	0	2
	0	0	1		3	0	1		2	0	0		1	1	1
	2	0	0		1	0	0		2	0	0		1	0	0
	1	0	0		0	0	0		0	0	0		1	0	0
	0	0	2		2	4	4		1	1	0		0	0	1
	1	0	1		4	1	0		1	0	2		0	0	1
	0	0	0		0	0	0		0	1	1		1	6	0
	0	0	0		1	2	2		2	0	1		1	0	1
	2	0	0		1	1	2		0	0	1		0	0	0
	0	0	0		0	0	0		0	0	0		0	0	0
	0	0	0		1	0	1		0	1	0		0	1	0
	0	0	0		0	3	0		0	0	0		0	0	1
	2	2	1		0	0	2		1	0	0		0	0	0
	3	0	2		0	0	0		0	1	1		1	0	0
	0	1	0		1	0	0		0	1	1		1	1	2
	3	0	0		2	2	0		0	0	0		1	0	0
	0	0	0		0	1	0		0	2	0		2	0	1
	4	0	0		0	1	3		0	1	0		0	0	0
	0	0	0		2	2	2		2	0	0		1	0	0
	3	0	0		0	0	2		0	1	0		1	0	0
	0	1	0		0	2	2		0	0	0		0	2	0
	0	0	0		4	3	0		0	0	0		1	0	0
	1	1	0		0	0	0		1	0	0		1	0	1
	2	2	1		0	0	0		0	3	1		0	0	0
	2	0	0		0	2	1		2	1	0		2	0	0
	2	0	1		1	0	0		1	0	0		0	0	0
	2	0	0		0	0	0		2	0	0		0	0	0
	0	0	0		2	0	3		1	0	0		1	0	0
	0	0	3		2	1	3		0	1	1		0	0	0
	0	0	0		0	1	4		3	1	1		1	0	0
	0	1	0		0	0	1		0	0	1		0	0	0
	1	0	0		0	1	0		0	1	0		1	1	1
	0	0	0		1	1	4		1	0	0		0	0	1
	2	0	1		0	1	4		0	0	0		0	0	0
	0	0	0		0	0	3		0	0	0		0	0	0
	1	0	0		6	0	0		1	0	0		0	1	0
	2	0	3		0	2	2		3	0	0		0	0	0
	0	0	0		2	3	0		1	0	0		0	0	0
	2	1	0		3	0	0		1	0	0		0	0	1
	2	0	0		2	0	3		1	0	0		1	0	1
	0	0	0		2	0	0		2	1	0		2	0	1
	0	0	0		0	2	0		0	1	0		2	0	2
	2	0	0		0	1	0		0	1	0		1	2	0
	0	0	2		0	1	0		0	0	0		1	1	2
	0	1	0		3	0	1		0	1	0		0	0	2
	0	1	0		1	2	2		0	0	0		0	0	2
	0	3	1		0	1	2		0	0	2		0	0	0
	1	2	0		6	1	4		0	0	0		0	0	0
	0	0	1		2	2	2		0	1	0		0	1	0
	2	0	2		2	2	0		0	1	0		0	0	0
	2	0	0		3	5	4		1	1	0		0	0	0
	2	0	0		1	0	0		1	0	0		2	0	0
	1	0	3		0	0	2		0	0	1		0	1	0
	2	0	0		5	0	1		0	0	1		0	0	2
	2	0	0		2	5	1		0	1	1		0	1	2
	0	0	0		0	2	0		0	1	1		0	1	0
	0	0	1		0	0	2		0	0	0		0	2	0
	0	0	1		0	1	1		0	0	0		0	1	1
	0	0	0		2	0	4		0	0	0		0	0	1
	1	0	0		1	0	1		0	0	0		2	0	0
	0	0	0		0	3	1		1	0	0		0	0	0
	0	2	0		4	1	0		0	0	1		3	0	0
	0	0	0		0	1	0		0	0	0		1	0	0
	0	0	0		2	2	2		0	0	0		0	0	0
	0	0	0		6	1	2		0	2	0		0	0	2
	0	2	0		8	0	3		0	0	1		1	0	0
	0	3	0		2	0	2		0	0	0		0	2	0
	0	1	0		0	2	0		0	0	0		1	0	0
	0	0	0		2	0	1		0	0	0		0	1	1
	0	1	0		0	1	0		1	0	0		1	0	1
	1	0	1		0	0	1		0	1	0		0	0	0
	0	1	1		0	0	2		0	1	0		1	0	0
	3	1	3		0	0	3		0	1	0		0	0	0
	0	0	0		4	3	0		0	0	0		0	2	1
	0	0	0		2	3	0		0	0	1		0	0	1
	0	0	0		0	1	0		0	2	0		2	0	1
	2	0	0		0	1	2		1	2	0		0	0	0
	0	0	0		2	2	0		0	1	0		0	0	0
	2	0	0		1	3	2		0	0	0		1	0	2
	0	0	0		1	1	0		1	0	0		0	2	1
	0	0	0		0	1	0		0	0	0		1	0	0
	0	0	0		1	0	0		0	0	0		1	0	0
	0	0	0		1	0	1		0	2	0		0	0	0
	0	0	0		1	0	2		0	2	0		0	1	1
	1	0	0		0	0	0		2	0	1		1	1	0
	2	0	0		0	0	1		0	0	2		1	2	2
	3	0	0		0	0	1		0	1	0		0	0	1
	0	0	2		0	0	2		0	0	0		0	1	1
	1	0	4		1	0	1		1	2	0		1	0	0
	1	0	1		3	0	3		0	0	0		1	3	1
	0	0	3		4	0	0		0	0	0		0	2	0
	0	0	5		4	2	0		0	0	0		4	0	2
	2	2	0		0	2	0		1	1	0		0	0	0
	0	4	0		5	2	0		0	0	0		2	0	0
	0	1	0		0	2	2		1	2	0		2	0	0
	0	1	0		0	1	2		0	0	0		0	0	0
	4	3	0		1	2	3		1	1	0		0	1	0
	0	2	3		1	1	2		0	1	0		0	0	0
	0	2	0		2	0	0		0	3	1		0	0	0
	0	0	0		3	1	0		0	0	0		0	0	0
	0	1	3		2	0	0		0	0	0		0	2	0
	1	0	0		0	0	0		0	0	0		2	3	1
	0	0	2		0	0	1		0	1	0		0	0	0
	1	0	1		5	0	2		0	0	0		0	0	0
	0	0	2		0	2	0		1	2	0		0	0	0
	0	0	0		0	0	3		1	1	1		0	0	0
	0	0	0		0	1	0		1	0	1		0	0	0
	0	0	0		0	2	1		0	0	1		0	0	0
	0	0	0		2	0	2		1	0	0		2	1	0
	0	0	0		1	1	0		1	0	0		0	0	2
	0	0	0		0	1	3		0	1	0		0	0	1
	0	2	0		1	0	3		1	1	0		0	0	0
	0	1	0		3	0	0		2	1	0		3	1	1
	2	0	3		0	0	1		2	0	0		0	0	1
	0	0	1		0	0	1		2	0	0		0	0	1
	0	0	0		0	1	2		1	0	0		0	1	0
	0	0	0		1	1	4		2	1	0		0	0	1
	0	0	0		2	0	0		0	0	0		0	0	0
	0	0	0		2	0	1		0	1	0		2	0	1
	4	1	1		1	2	3		1	1	0		2	0	2
	2	1	0		2	0	3		1	1	0		0	0	1
	0	0	0		2	2	1		1	1	0		1	0	0
	0	0	0		0	2	1		2	0	0		0	0	0
	0	0	2		1	0	1		2	0	0		0	0	0
	0	0	0		2	0	4		0	0	0		1	2	1
	0	0	0		2	1	0		2	0	0		0	0	0
	4	0	0		0	1	2		0	1	1		2	1	4
	2	0	0		0	0	1		2	1	0		0	0	0
	1	0	1		0	2	1		1	1	1		0	0	0
	0	0	1		2	3	0		0	0	1		0	0	1
	4	0	0		0	0	0		0	0	0		1	0	0
	0	0	0		0	0	0		1	0	0		1	0	0
	0	3	0		0	0	4		0	0	1		0	0	0
	0	0	0		7	1	0		1	1	1		0	2	0
	0	0	0		0	1	0		0	0	0		0	1	0
	2	0	0		0	1	2		0	0	0		0	0	1
	4	0	2		2	1	2		0	1	0		0	0	0
	0	0	2		0	0	0		0	1	1		0	0	0
	0	0	1		0	0	1		2	0	1		2	0	1
	0	1	0		0	0	0		0	0	1		0	0	0
	0	0	1		0	0	2		1	2	0		0	1	0
	0	0	0		2	0	0		0	2	0		0	0	0
	0	0	0		0	0	0		1	1	0		0	0	1
	2	0	1		2	0	0		1	0	0		1	0	0
	0	0	1		1	0	0		2	0	0		0	1	0
	0	0	0		4	0	3		0	0	1		1	0	1
	2	0	0		0	2	2		0	0	0		0	0	1
	0	0	0		0	2	2		0	1	0		1	3	0
	0	0	0		0	0	2		0	3	1		1	1	1
	0	0	1		0	0	0		1	1	1		0	1	0
	2	0	0		5	3	0		1	1	0		0	0	0
	0	0	0		0	1	0		0	0	0		0	0	0
	0	0	1		0	0	1		1	1	0		0	0	1
	0	0	0		2	0	0		1	0	0		1	0	0
	0	0	0		0	0	0		0	3	0		0	0	0
	0	0	0		2	0	3		1	0	0		1	2	0
	0	0	1		2	0	3		0	1	0		0	0	2
	4	0	0		0	3	4		0	0	0		0	1	1
	1	0	0		2	4	1		1	0	0		1	2	0
	0	0	0		0	4	0		0	1	0		0	0	0
	2	0	0		0	0	0		0	0	0		2	0	0
	2	2	0		0	0	0		1	2	0		0	1	0
	0	0	0		0	0	0		0	0	0		0	2	0
	0	3	0		0	0	0		0	0	0		0	0	3
	0	4	0		0	3	1		0	0	0		0	0	0
	1	0	0		0	4	2		0	0	0		1	0	0
	1	0	0		0	0	1		1	0	0		0	0	0
	2	0	0		2	2	0		1	0	0		0	0	0
	0	0	0		0	6	0		2	1	0		0	0	0
	0	0	0		0	2	0		1	1	1		0	0	0
	0	4	1		2	0			1	0	1		0	0	0
	0	0	0		0	0			1	2	1		0	0	0
	1	0	0		3	0			3	1	1		1	2	2
	0	0	0		4	0			0	1	0		0	0	1
	2	0	0		0	0			0	0	0		0	0	0
	0	0	0		0	2			0	0	1		0	0	0
	0	0	0		1	1			0	0	0		0	0	0
	0	0	0		0	0			0	0	0		2	0	1
	0	0	0		1				0	1	0		1	0	1
	2	0	0		0				3	0	0		0	0	1
	0	0	0		0				0	1	0		0	1	0
	0	0	1		0				2	0	0		0	1	0
	0	0	0		1				2	0	1		0	4	0
	0	0	0		0				0	0	1		2	0	1
	0	0	0		1				1	0	1		0	0	2
	0	0	0		0				0	0	0		0	0	0
	0	0	0		1				1	0	1		0	1	0
	0	0	0		1				0	0	1		0	2	0
	2	1	0		2				0	1	0		0	3	1
	0	1	1		0				0	0	0		0	0	0
	0	0	1		1				0	0	0		1	0	0
	0	0	0		0				1	0	1		0	1	0
	0	0	0		1				2	0	1		1	0	1
	2	0	0		1				0	1	0		0	0	0
	0	3	0		4				1	0	0		0	1	0
	0	3	2		1				2	0	0		1	0	0
	3	2	2		0				0	1	0		0	0	0
	0	1	0		0				1	0	1		0	0	1
	0	0	2		0				1	1	1		0	0	0
	0	0	1		0				1	0	0		2	0	0
	0	0	0		0				0	0	0		1	0	0
	1	1	0		0				1	0	0		1	0	0
	4	0	0		0				0	1	0		1	0	0
	0	0	0		0				0	1	0		0	0	0
	0	0	0		0				0	1	1		0	0	0
	0	0	0		0				3	3	1		1	1	2
	0	0	1		0				3	0	0		0	0	1
	0	4	1		0				0	1	0		1	2	0
	0	0	0		0				1	0	2		0	0	1
	4	0	1		1				0	2	0		1	2	1
	0	0	2		1				0	1	0		0	0	0
	0	1	0		0				0	2	0		0	1	0
	0	2	0		0				0	1	0		1	1	0
	0	0	0		1				0	1	1		0	1	1
	0	0	0		0				1	0	0		0	0	2
	0	0	0		0				0	2	0		1	0	2
	0	0	0		0				0	1	0		0	0	1
	0	0	1		1				1	2	0		2	0	0
	0	0	1		3				0	0	0		0	0	0
	0	0	0		0				0	0	2		0	0	1
	0	0	0		1				4	0	0		0	1	0
	2	1	1		0				0	0	0		0	0	0
	0	0	2		0				0	0	1		2	0	1
	0	0	1		2				1	0	0		0	0	0
	0	1	0		2				0	0	1		0	1	1
	1	0	0		3				0	0	1		1	0	1
	3	0	0		3				1	0	1		0	0	0
	0	0	1		0				0	0	0		0	0	0
	0	0	2		1				0	2	0		1	0	0
	0	1	0		2				0	0	0		0	0	0
	0	0	1		4				0	2	0		0	0	0
	0	0	0		3				0	0	1		1	0	1
	1	1	0		0				0	0	0		3	0	1
	2	1	0		2				0	0	0		1	0	1
	2	0	0		2				0	0	0		1	1	2
	0	0	1		0				0	0	1		0	0	0
	0	0	3		0				1	1	1		1	2	0
	1	0	0		0				0	2	1		0	2	0
	0	1	0		0				0	0	1		0	0	0
	0	0	1		0				2	0	0		2	0	0
	2	0	0		1				1	0	0		1	0	0
	1	0	0		1				1	0	0		0	0	0
	1	0	0		0				1	0	0		0	0	1
	2	0	0		0				2	1	0		1	0	0
	0	0	0		1				1	1	0		1	2	0
	0	0	0		0				0	0	0		0	1	1
	0	0	0		2				0	0	0		0	2	0
	0	0	0		3				0	1	1		0	0	0
	1	0	0		0				0	0	1		1	0	0
	2	0	0		3				0	1	1		0	0	0
	0	0	0		0				0	1	1		2	1	1
	3	0	2		0				0	0	0		1	0	0
	2	0	0		0				2	0	0		0	0	0
	0	0	0		2				0	0	1		0	0	0
	2	1	0		4				0	0	1		0	0	1
	0	1	0		0				0	0	1		0	0	1
	0	1	0		3				1	1	0		2	0	0
	5	1	0		2				0	1	0		0	0	0
	0	1	0		2				0	1	0		0	0	0
	0	0	0		3				1	2	0		0	2	0
	0	0	1		0				2	0	0		0	1	0
	2	1	1		2				0	1	1		0	0	0
	0	0	0		2				0	0	1		0	1	1
	0	0	0		2				0	1	1		1	1	2
	2	0	0		1				0	0	0		0	0	1
	0	0	0		0				0	2	1		1	0	2
	0	0	0		2				0	1	1		0	0	1
	0	0	1		3				0	0	1		0	1	0
	0	0	0		0				0	1	0		1	2	0
	0	0	0		0				0	0	0		0	2	0
	0	0	0		0				0	0	0		0	1	0
	0	2	0		0				0	0	0		1	0	1
	0	0	0		0				1	0	0		0	0	1
	0	0	1		0				0	0	0		0	1	1
	2	1	1		1				1	2	0		1	0	0
	0		0		0				0	0	0		0		0
	0		1		0				0	3	1		2
	2		2		0				0	0	0
	2		0		2				1	0	0
	4		1		1				0	0	0
	1		0						1	1	0
	1		0						0	1	0
	1		0						1	1	1
	1		0						2	1	1
	0		1						0	1	0
	0		0						2	1	0
	0		0						2	1	0
	2		0						1	2	0
	0		0						0	0	0
	1		0						0	1	2
	0		0						0	0	2
	2		1						0	1	0
	0		0						1	0	0
	0								1	0	0
	1								1	1	0
	0								0	1
	0								3	0
	0								2	3
	0								0	1
	0								0	1
	2								0	0
	4								1	1
	4								1	1
	0								0	1
	0								0	0
									0	0
									1	1
									2
									0
									0
									0
									0
									2
									2
									0
									1
									0
									0
									0
									0
									1
									0
									0
									2
									1
									0
									1
									0
									0
									0
									2
									0
									1
									0
									0
									0
									0
									0
									0
									1
									1
									0
									0
									0
									0
									2
									0
									3
									2
									0
									0
									1
									1
									0
									0
									1
									1
									1
									2
									1
									1
									0
									0
									0
									0
									0
									0
									0
									0
									0
									0
									2
									0
									1
									0
									1
									1
	0.618868	0.460922	0.517375	#DIV/0!	1.11881	1.12407	1.05063		0.534884	0.484962	0.309615	#DIV/0!	0.538922	0.448	0.439122
