# Supplementary material for: Essential roles of Caspase-3 in facilitating Myc-induced genetic instability and carcinogenesis
Source: eLife journal article supplement (doi:10.7554/elife.26371), 2017-07-10
Supplement: supp [file elife_poa_e26371_Fig.1_source_data_8.xlsx]

## Sheet: Sheet1
MCF10a				Myc				Casp3KO+dnC3				Casp3KO+dnC3+Myc				Cell Line	MCF10a				Myc				Casp3KO+dnC3				Casp3KO+dnC3+Myc
0	1	1		0	0	0		0	1	1		1	0	0			0.434	0.346	0.386719		1.17577	1.08876	0.951362		0.51	0.517787	0.448339		0.509091	0.547862	0.634454
0	0	0		2	0	1		0	0	1		0	0	1		Average	0.388906				1.07196				0.492042				0.563802
1	1	0		0	0	0		0	1	0		0	0	1		Stand Dev	0.0440408				0.113142				0.0380472				0.0641836
0	0	2		0	0	0		0	0	0		0	0	1		SEM	0.0254269	0	0	0	0.0653225	0	0	0	0.0219666	0	0	0	0.0370564	0	0	0
0	0	1		2	1	1		2	4	3		0	0	0
0	0	1		3	3	0		0	1	0		0	0	1
0	0	0		4	0	1		0	0	0		0	0	1
0	0	0		1	1	1		2	1	1		1	0	1
0	1	0		0	1	0		0	0	0		0	0	1
0	0	0		0	0	1		2	2	1		0	0	1
0	1	0		0	0	0		3	1	2		0	0	1
0	1	0		2	2	0		0	0	1		0	2	1
1	1	1		1	1	2		2	4	1		0	0	1
0	0	0		0	3	1		0	1	0		0	1	1
0	0	0		1	1	2		0	2	0		1	0	1
0	1	0		1	1	1		0	0	0		0	2	0
0	0	0		0	0	1		0	0	0		0	1	0
1	0	1		1	3	0		0	0	0		2	0	0
0	0	1		2	2	1		0	0	1		0	0	0
0	0	0		0	1	0		0	0	1		0	2	0
0	0	0		2	1	0		0	1	1		0	0	1
1	0	1		0	1	0		1	0	1		0	0	2
0	1	0		2	0	1		1	0	0		0	1	2
0	0	0		3	1	0		0	1	0		1	0	2
0	0	0		2	1	0		1	0	1		0	3	1
0	0	0		0	2	1		1	4	0		0	0	0
0	0	1		0	2	3		0	0	2		0	0	0
0	0	0		0	2	0		0	1	1		0	0	1
1	0	1		0	0	1		0	4	1		0	0	2
0	0	0		0	1	0		0	1	0		3	0	3
0	0	0		1	2	1		0	1	0		2	0	3
1	0	1		1	1	1		0	0	0		1	1	2
0	0	0		0	1	0		0	1	1		2	1	2
0	0	0		1	0	3		0	0	0		2	0	1
0	1	0		2	0	0		0	1	1		0	0	0
0	1	0		3	2	1		0	1	1		0	0	1
0	0	0		0	1	1		0	0	3		0	2	1
0	0	0		0	1	0		0	0	2		0	2	0
0	0	0		2	0	0		0	0	2		0	0	0
0	0	0		0	2	1		0	0	1		1	0	1
1	2	0		1	1	1		0	1	0		2	1	1
0	0	0		4	2	0		0	1	0		0	1	1
0	0	1		2	1	2		0	0	0		0	0	1
0	0	0		0	1	0		0	2	2		0	0	1
0	0	0		0	0	1		0	0	1		2	0	2
0	0	0		0	2	1		0	1	1		2	0	2
1	0	1		0	2	0		0	0	1		1	0	2
0	0	0		0	1	0		0	0	1		1	0	2
0	0	0		0	1	1		2	1	1		0	2	2
0	0	0		2	0	1		1	1	1		0	1	0
0	0	0		0	2	0		2	1	0		2	1	1
0	0	0		0	1	0		0	0	0		3	0	0
1	0	1		2	2	0		0	0	1		1	0	1
0	0	0		3	1	1		2	0	1		0	1	1
1	0	0		3	1	1		0	2	0		0	0	2
1	0	0		0	1	1		0	2	1		0	0	0
0	0	0		0	2	0		0	0	1		1	0	0
0	0	1		1	2	1		0	1	0		0	1	0
0	0	0		0	1	1		3	0	0		0	0	1
0	0	0		1	2	0		0	1	0		1	1	0
0	1	0		0	1	1		0	1	0		0	1	0
1	0	0		1	2	1		0	1	0		0	0	0
1	0	0		0	1	0		0	0	1		0	0	0
1	0	0		2	1	0		0	0	0		1	0	0
0	0	0		0	1	1		1	0	0		0	0	0
0	1	0		0	1	2		0	0	0		0	0	0
0	0	0		0	0	1		0	1	1		0	0	0
0	0	1		2	3	2		0	0	1		0	1	0
0	0	0		2	1	0		1	0	0		1	0	0
0	0	0		0	1	0		1	1	1		1	0	0
0	1	0		0	1	1		0	1	0		2	2	0
0	0	0		0	1	0		0	0	1		0	0	0
0	1	0		1	1	0		1	2	1		0	0	0
0	0	0		3	1	2		1	2	1		0	0	0
0	0	0		0	1	1		0	0	0		0	0	0
0	1	0		3	0	1		1	1	0		0	3	0
0	0	0		1	0	0		1	0	0		0	0	2
0	0	0		2	0	0		2	0	1		1	2	1
0	0	1		2	1	1		1	0	0		1	2	1
0	0	0		2	1	0		1	0	0		1	0	0
0	1	0		1	0	1		0	1	0		0	0	1
1	0	0		2	0	1		1	1	1		1	3	0
0	0	0		0	1	1		1	0	1		0	0	2
0	0	0		0	0	1		1	2	1		3	0	0
0	1	0		0	1	3		2	0	0		0	1	1
0	0	0		0	1	0		2	0	0		0	0	1
0	0	1		1	1	0		0	0	0		2	1	1
1	0	0		0	2	1		2	0	1		0	1	0
0	0	0		2	1	0		0	0	1		0	0	0
0	0	0		1	2	2		1	1	0		0	0	0
0	0	0		1	1	2		1	0	1		0	0	1
0	1	0		1	1	1		1	0	1		0	0	1
0	0	0		0	0	1		0	0	0		2	0	0
0	0	0		2	2	2		0	0	0		0	2	0
1	1	3		3	1	1		0	1	0		0	1	1
0	0	1		0	1	1		0	0	1		0	1	0
0	0	0		1	3	0		0	2	1		0	1	0
0	0	0		1	1	2		0	0	1		0	0	0
0	0	0		1	2	0		0	0	1		0	1	0
0	0	0		1	2	2		0	2	0		0	0	1
0	0	0		1	1	1		0	1	1		1	0	1
0	0	0		1	1	0		1	1	0		2	0	0
1	0	0		1	1	1		1	0	0		0	1	1
1	1	2		2	1	0		0	2	0		1	0	0
0	0	0		1	1	1		0	0	0		1	4	1
0	0	0		0	2	2		2	0	0		1	1	0
0	0	0		1	1	0		1	0	0		1	0	1
0	0	0		1	2	0		0	0	0		2	3	1
0	0	0		2	0	0		0	0	1		0	0	1
0	0	1		2	3	2		1	0	0		1	1	1
0	0	1		1	0	0		0	1	0		2	1	1
0	0	0		3	2	0		1	0	1		0	2	0
0	0	0		1	4	0		0	1	1		1	1	0
0	0	1		0	1	0		0	1	0		0	2	0
0	0	0		2	1	1		0	2	1		0	1	2
0	0	0		3	1	0		2	0	1		0	0	0
0	0	0		1	2	1		1	2	2		0	0	1
0	0	0		1	1	0		0	0	2		1	0	1
0	0	0		1	1	1		0	2	0		0	2	1
0	0	0		1	0	0		1	1	1		0	0	0
1	0	1		2	1	0		1	0	1		2	0	0
1	0	2		1	1	1		0	0	0		0	2	1
0	0	2		2	0	1		1	2	1		0	0	0
0	0	0		1	1	0		0	2	1		0	0	0
0	0	0		2	1	1		0	1	1		1	0	0
0	0	0		2	0	1		0	1	0		1	0	2
0	0	0		1	0	0		0	2	0		1	0	2
0	0	0		1	1	0		0	1	1		1	0	0
0	0	1		1	0	0		0	0	1		0	0	2
0	0	0		1	0	1		0	0	2		0	0	2
0	0	0		1	1	3		2	0	2		0	0	1
0	0	0		2	1	0		0	0	0		2	1	0
1	0	1		1	1	0		0	0	0		0	2	2
0	0	0		1	1	1		0	0	1		0	1	0
0	0	0		0	1	0		1	1	1		0	3	2
0	0	0		0	1	1		0	1	0		1	0	2
0	0	0		2	1	1		0	0	0		0	0	1
0	0	2		0	0	0		0	0	0		0	2	0
0	0	1		2	1	0		1	0	0		1	2	1
0	0	0		1	1	3		2	2	0		1	0	1
0	0	0		3	1	0		1	0	0		0	0	0
0	0	0		2	1	0		0	0	1		0	0	1
0	0	0		0	0	1		1	0	1		0	0	1
0	0	2		2	2	0		3	0	1		0	0	1
0	1	1		1	1	1		1	1	1		0	1	0
0	0	0		1	0	2		0	0	0		0	0	1
0	0	0		2	1	1		0	0	1		0	0	1
0	0	0		1	2	1		0	1	1		0	0	1
2	0	0		2	2	0		0	1	1		0	0	1
1	0	1		2	0	0		0	0	0		0	1	1
2	0	1		1	1	0		0	1	0		0	0	0
0	0	1		2	2	2		1	1	0		0	0	0
1	0	0		3	1	1		0	1	1		0	0	1
1	0	0		2	1	0		0	0	0		0	0	1
0	0	0		1	1	1		0	0	1		0	0	0
2	0	0		2	1	0		0	0	1		0	1	1
1	0	0		1	1	1		0	0	0		0	2	1
1	1	0		1	1	1		0	1	0		0	2	1
0	0	0		1	2	0		0	0	1		1	0	2
1	2	0		2	0	0		0	0	1		0	0	0
1	0	1		1	2	0		0	1	1		0	0	2
1	0	4		1	1	2		1	2	0		0	0	2
1	0	0		2	0	0		0	1	1		0	0	0
1	0	0		3	0	0		1	0	0		0	1	1
2	0	0		3	0	2		1	0	0		0	1	2
2	1	0		1	0	0		0	0	0		1	0	1
0	1	1		1	2	1		0	1	0		1	0	1
0	0	0		1	0	0		0	0	1		0	0	1
1	0	0		1	0	0		0	2	0		0	0	0
1	2	0		2	3	0		1	1	1		1	1	0
2	0	0		1	1	2		1	0	0		0	2	0
0	2	0		1	2	2		1	1	0		1	1	0
1	0	0		1	1	0		0	0	0		0	1	1
0	0	0		1	1	1		0	0	0		0	0	0
1	0	1		0	1	1		0	1	0		0	0	0
2	0	0		2	2	0		2	1	0		1	0	1
1	0	0		0	2	0		1	0	0		0	1	1
0	1	0		2	2	3		2	0	0		0	1	0
0	0	0		2	0	0		1	2	0		1	0	0
0	0	1		1	3	0		0	0	0		0	0	1
0	0	1		1	1	1		0	0	0		1	0	2
0	0	0		4	1	3		0	1	0		1	0	2
0	0	0		2	1	0		0	0	0		0	0	0
1	1	0		1	1	0		0	0	0		0	0	0
1	1	0		1	1	2		0	0	1		1	2	1
1	2	0		2	0	1		1	0	1		0	0	0
1	0	0		2	1	2		1	0	0		1	2	1
1	1	0		1	0	1		0	1	0		0	0	0
1	1	0		1	1	2		0	0	0		0	0	0
1	2	0		2	1	0		1	0	1		0	1	0
0	2	0		2	1	0		1	0	0		0	1	0
0	1	0		1	1	3		0	1	1		0	0	0
1	0	0		1	2	0		3	0	0		0	0	1
1	0	1		1	2	0		0	0	1		0	0	0
2	0	1		2	1	2		0	0	0		2	2	0
1	1	0		1	1	0		0	0	1		0	1	0
1	0	0		1	3	1		0	0	0		1	0	0
0	0	0		0	1	2		1	1	0		0	2	0
0	0	0		0	1	0		1	1	2		0	1	0
0	0	0		2	0	2		1	0	0		0	1	1
1	0	0		2	1	1		1	0	0		0	0	0
1	0	0		1	0	1		2	0	1		0	0	0
2	1	0		1	1	0		0	0	0		0	2	1
0	2	0		1	1	0		0	0	0		0	1	1
1	1	1		1	1	1		1	0	1		0	0	0
1	1	0		1	2	0		0	0	1		1	0	1
1	0	1		1	1	3		0	1	1		2	1	0
1	2	1		1	1	2		1	1	0		0	0	0
1	1	1		1	1	0		0	0	0		1	0	0
1	0	0		2	1	0		1	0	0		0	0	1
0	0	1		2	1	0		0	0	0		0	0	0
1	1	1		4	1	2		1	0	0		0	0	1
0	0	0		3	1	0		1	1	0		2	0	1
2	1	0		2	2	0		0	1	1		0	0	0
0	1	0		1	1	0		0	0	0		3	1	1
1	0	0		2	2	1		0	0	0		0	0	3
0	0	0		0	2	0		1	0	1		0	0	0
0	0	0		1	0	2		2	1	1		1	0	0
2	0	2		1	1	0		1	1	0		0	1	0
1	1	0		1	1	2		0	0	0		1	0	0
0	0	0		0	0	2		1	1	0		1	1	0
0	0	0		1	2	0		0	1	1		0	0	1
0	0	1		1	2	0		0	0	1		0	0	2
0	1	0		4	1	2		0	0	0		1	0	4
1	0	1		2	1	1		1	2	0		1	0	1
1	0	0		2	1	0		0	0	0		2	0	0
1	1	0		0	2	0		0	2	0		0	0	0
1	0	0		1	2	0		0	3	0		0	0	0
2	0	0		1	1	1		0	0	0		0	0	0
2	0	0		0	0	0		0	2	1		0	0	0
0	1	0		0	1	0		1	2	1		0	0	1
0	1	1		0	0	0		1	1	0		0	0	0
1	1	1		0	1	1		1	0	0		1	0	0
0	0	0		0	1	0		0	0	0		0	0	2
0	1	2		0	2	2		0	0	0		1	0	0
0	0	2		0	1	1		0	1	2		0	0	2
1	0	0		2	2	0		0	0	0		0	0	1
2	0	0		1	2	1		2	0	0		0	0	0
1	0	0		0	2	0		1	2	0		0	1	2
0	2	0		4	1	2		1	0	0		0	1	1
0	2	0		1	0	1		0	1	1		0	1	1
0	0	0		1	0	1		1	0	0		0	0	1
0	0	1		1	0	3		0	0	0		0	0	1
0	0	0		1	2	2		1	1	0		1	0	0
1	1	0		0	2	0		1	1	0		0	0	0
0	1	0		1	2	1		0	0	0		0	1	0
0	0	0		0	1	1		2	1	1		0	2	0
2	0	2		0	1	0		0	0	1		1	0	0
1	0	0		2	1	0		0	0	0		2	2	0
2	0	0		3	2	2		1	0	0		0	0	2
2	0	0		1	2	0		1	2	0		0	0	0
1	0	0		2	2	1		1	0	0		0	0	1
0	0	0		1	0	0		0	0	0		2	2	1
0	0	0		4	0	2		0	1	1		2	3	1
0	1	1		5	1	1		1	0	0		2	0	4
0	0	0		1	2	1		0	0	0		0	0	0
0	0	0		0	1	0		0	0	0		0	1	0
0	0	0		1	4	0		0	1	1		0	0	0
2	0	0		1	0	3		1	1	0		0	0	1
0	1	0		2	1	1		0	0	0		1	0	0
0	1	0		1	1	1		0	0	0		0	0	1
2	0	2		2	1	0		1	1	0		2	1	0
1	0	0		1	1	2		2	0	0		1	0	0
1	0	1		0	1	0		0	0	0		2	0	0
1	0	0		1	2	2		0	0	1		1	1	0
0	1	2		2	1	1		2	0	1		2	1	2
0	0	1		3	0	3		3	0	1		0	1	0
0	0	0		1	0	0		0	0	0		0	1	0
0	1	0		1	2	0		0	1	0		0	3	2
1	0	0		1	3	0		0	0	1		2	1	0
1	0	0		2	1	1		0	0	0		1	1	0
0	0	0		0	0	1		0	0	0		0	2	0
2	0	1		1	1	0		0	0	0		0	2	1
1	0	2		1	1	1		0	0	0		2	0	1
1	1	0		0	2	0		1	2	0		0	0	1
2	1	0		1	0	1		0	1	0		0	0	0
1	0	0		1	1	3		1	0	1		0	1	0
1	0	0		1	1	0		0	0	1		0	1	1
0	0	0		1	1	2		0	0	0		0	1	2
0	0	0		1	2	1		1	1	1		0	2	0
0	0	0		2	2	1		0	0	1		1	2	0
0	0	1		0	1	2		1	2	1		1	1	0
0	0	1		1	1	1		1	0	0		0	2	0
0	0	0		2	2	2		3	0	0		1	1	1
0	0	5		1	1	0		0	0	1		1	0	0
0	0	3		1	2	0		0	1	1		0	0	0
0	0	2		2	1	2		0	0	0		0	0	1
0	0	0		2	1	0		2	0	0		1	0	1
0	0	0		1	1	3		1	0	0		1	0	0
0	0	0		3	1	2		0	1	0		0	0	0
0	0	0		1	3	1		0	1	2		1	0	0
0	0	0		1	2	2		0	1	0		1	1	1
0	1	1		1	1	1		1	0	0		0	2	0
0	0	1		1	1	2		2	2	0		0	1	1
0	0	0		1	0	2		0	0	1		0	1	0
0	1	0		1	1	0		0	0	1		0	1	0
0	0	1		3	0	2		2	0	0		0	1	2
0	1	0		1	1	2		0	0	1		0	0	0
0	0	1		3	2	1		0	0	1		1	2	1
0	0	0		0	2	1		0	0	0		0	2	1
0	0	1		1	3	2		0	1	0		0	1	0
0	1	1		2	1	2		1	1	1		1	0	0
0	0	1		2	2	2		2	0	0		2	2	0
0	0	3		2	0	4		0	1	0		0	3	1
0	0	0		1	0	2		0	0	0		0	1	1
0	0	0		1	2	2		0	0	0		2	3	1
1	0	0		1	2	1		0	0	0		4	0	0
2	0	0		1	2	0		1	0	0		0	0	0
1	0	0		1	1	0		0	0	0		0	0	1
0	0	0		2	0	0		0	2	0		0	0	1
2	0	0		1	1	0		0	2	0		0	0	0
2	0	0		1	1	2		0	0	1		1	1	2
1	0	0		0	1	1		0	0	0		2	0	0
0	0	0		1	2	0		0	0	0		0	0	0
2	1	2		1	1	2		0	0	0		0	1	2
1	0	2		1	1	2		0	0	0		0	0	2
1	1	1		2	1	1		0	1	0		0	0	2
2	1	2		0	0	1		1	0	0		1	1	1
1	1	0		1	0	1		0	0	0		1	2	0
0	0	0		2	2	2		0	0	0		0	2	0
1	0	0		0	1	0		1	1	1		0	1	0
0	0	0		0	1	1		0	1	0		1	0	1
1	0	0		1	2	0		1	0	0		0	0	0
1	1	0		1	1	2		0	0	0		0	0	1
0	0	0		1	1	3		0	1	1		0	0	0
1	0	0		2	1	1		0	0	1		0	0	0
1	2	1		1	1	0		1	0	0		0	0	0
0	0	0		1	1	1		0	1	0		1	0	0
0	0	1		2	0	2		0	2	0		0	0	2
0	0	2		0	3	0		0	0	0		1	0	1
0	0	1		2	1	0		0	0	2		0	0	0
0	0	1		0	1	3		0	0	1		0	0	2
0	0	0		2	1	2		0	0	1		1	0	1
0	0	0		1	2	4		0	0	1		0	2	1
0	0	0		1	2	0		0	1	1		0	0	1
1	1	0		2	0	1		3	0	1		0	0	0
0	0	0		1	1	0		0	0	1		0	1	0
0	0	1		3	2	2		0	0	0		1	0	0
2	0	0		1	0	0		1	0	0		4	0	2
0	1	0		2	1	0		0	1	0		0	0	0
0	0	1		1	3	0		2	0	0		4	0	2
0	0	0		1	2	1		2	0	0		0	1	0
2	2	0		1	2	0		0	2	1		0	0	1
0	0	0		1	1	0		0	1	0		0	0	0
0	1	1		1	2	1		0	1	0		2	0	0
0	0	0		1	0	0		0	0	0		2	2	0
0	0	1		3	0	4		0	0	0		1	3	2
2	3	0		1	0	0		1	0	1		0	0	0
1	0	2		1	2	1		0	0	0		1	1	0
1	2	0		2	2	0		0	0	0		1	1	0
0	0	0		2	2	2		1	0	0		2	0	0
1	0	0		2	1	1		4	1	0		2	0	0
2	2	0		1	0	1		0	0	0		0	0	2
2	1	1		1	0	0		0	0	0		0	2	1
1	0	1		1	1	2		0	0	0		1	0	0
0	0	1		1	2	3		0	2	0		3	0	0
0	0	2		1	1	3		0	0	1		2	0	0
3	0	1		1	0	0		0	0	0		0	0	1
2	0	1		2	0	1		0	0	0		0	0	0
0	0	0		1	1	3		1	2	2		0	2	0
0	0	2		1	1	0		0	0	0		2	0	0
0	1	1		1	1	0		0	0	0		2	0	0
0	1	0		1	1	0		0	1	0		2	0	0
2	2	1		1	1	0		0	0	0		0	0	0
1	1	1		1	1	2		0	0	0		2	0	1
1	2	1		0	1	1		1	0	0		0	1	1
0	0	1		0	2	3		0	0	0		0	0	0
0	1	1		1	2	1		1	0	1		0	1	1
0	0	1		1	1	1		0	0	0		0	0	1
0	0	1		1	1	0		0	0	1		0	0	2
0	1	1		3	0	0		0	0	1		2	1	0
3	1	1		1	1	0		2	0	0		0	2	0
0	0	0		1	1	1		0	0	0		1	0	0
0	0	0		2	1	0		1	2	0		1	0	0
0	0	0		0	2	0		0	0	0		1	0	2
1	0	1		2	1	2		0	0	0		0	0	0
0	1	0		1	1	0		1	0	0		0	2	0
0	1	0		1	1	0		0	1	0		0	2	1
1	0	0		0	1	3		1	0	0		0	1	0
0	0	0		4	1	0		2	0	1		0	1	0
2	0	0		1	1	1		1	1	0		1	0	0
0	1	0		0	1	0		0	1	1		1	0	0
0	0	0		0	1	0		0	0	1		0	1	0
2	1	0		1	2	1		0	0	1		0	1	1
1	0	0		0	1	2		0	2	1		0	2	1
1	0	0		0	2	0		1	0	1		1	1	0
0	1	0		0	1	2		0	0	0		1	2	0
0	0	0		1	1	1		0	1	0		0	0	1
1	0	0		0	2	0		0	1	0		0	0	3
3	1	0		1	1	1		3	0	0		0	0	1
0	1	0		4	0	0		0	1	0		0	0	0
0	1	0		0	2	0		0	0	0		0	0	0
1	0	1		0	2	2		1	0	1		0	0	0
0	0	1		0	1	0		3	0	1		2	0	0
1	1	1		2	3	2		0	0	0		1	0	0
0	0	1		0	0	1		0	1	0		2	0	0
1	0	1		0	1	1		1	1	1		0	0	0
1	0	1		0	1	1		0	1	2		0	2	2
0	0	0		2	2	0		0	1	0		0	1	0
0	0	0		1	1	1		1	1	0		1	0	1
0	1	1		3	1	2		0	0	0		0	2	3
2	0	0		4	1	2		0	0	0		0	0	0
0	0	1		2	1	1		0	0	0		0	0	1
0	0	1		4	0	1		2	0	0		0	1	0
0	0	0		1	1	2		1	0	0		0	1	1
0	0	0		2	2	2		0	0	1		0	0	1
0	2	1		1	1	3		0	0	1		1	0	2
0	0	1		1	2	1		0	1	1		2	1	0
0	0	1		2	2	1		3	0	1		1	0	0
0	1	1		1	2	0		1	0	0		0	0	0
0	0	1		2	1	0		0	1	0		0	1	0
0	0	0		2	3	1		2	1	0		1	1	1
1	0	0		3	1	2		3	0	1		0	1	0
0	0	0		0	2	1		1	0	1		0	0	0
0	0	0		1	1	2		0	0	0		0	0	0
2	1	0		2	2	2		0	0	0		0	0	0
0	0	1		2	1	1		2	0	2		0	0	0
1	0	0		0	0	2		0	0	0		3	0	3
1	0	0		2	0	2		0	0	0		0	0	0
1	1	1		0	0	1		1	0	1		0	2	0
0	1	1		1	1	1		0	1	1		1	0	0
0	0	0		0	2	2		0	0	0		1	2	2
1	0	0		0	2	1		0	0	0		2	0	2
0	0	1		0	0	3		2	0	1		0	0	0
0	1	0		0	1	1		0	0	1		0	0	0
0	1	0		0	1	2		3	0	0		0	1	1
0	0	0		1	1	0		1	1	0		0	0	2
1	0	0		0	2	0		1	0	0		0	0	0
0	0	1		0	1	1		1	0	1		0	0	0
0	1	0		0	1	1		0	1	1		0	0	0
0	1	0		1	0	2		0	2	1		1	0	1
1	0	0		1	1	2		0	0	0		0	0	0
0	0	0		0	1	2		5	0	0		0	0	0
0	1	1		0	1	2		0	0	1		1	0	0
0	0	1		4	1	2		0	0	0		0	1	0
0	0	0		2	0	1		0	1	1		0	1	1
0	1	0		2	1	1		4	0	0		0	0	1
0	0	3		2	0	1		0	0	0		1	0	1
1	0	0		1	0	1		1	1	0		0	1	0
2	0	0		3	1	0		1	2	0		0	0	0
0	1	0		0	1	0		3	1	0		0	1	0
1	0	0		0	0	0		0	1	0		0	1	1
0	0	0		1	2	1		0	0	0		0	3	0
0	2	0		1	1	1		0	0	1		0	1	0
0	0	2		1	0	4		0	0	0		1	2	0
0	2	1		1	1	1		0	0	0		1	1	0
0	0	0		2	1	1		0	1	1		0	3	0
0	1	0		2	1	1		0	2	2		0	0	1
0	1	0		0	1	2		1	1	0		0	0	1
2	1	0		0	1	1		0	2	0		3	0	0
1	2	0		1	1	2		0	2	1		2	0	0
0	1	0		1	1	1		0	1	0		1	0	1
0	0	0		1	1	2		1	0	0		1	2	0
2	0	0		0	0	0		0	2	1		0	0	0
0	0	0		0	0	2		1	0	1		2	1	1
0	0	0		0	0	0		0	2	0		0	0	0
1	0	1		2	0	3		0	2	1		1	0	1
2	0	1		1	2	1		0	0	0		1	0	1
0	0	0		2	3	0		0	0	0		0	0	2
0	0	0		0	1	0		0	1	1		1	2	0
0	2	1		1	0	2		1	1	1		1	0	2
0	1	0		1	0	0		0	0	0		0	0	2
1	0	1		1	0	1		1	1	0		0	0	0
0	1	0		1	0	1		1	2	0		0	0	2
1	0	0		1	1	2		0	0	1		0	0	0
1	0	0		0	1	1		1	2	0		0	0	0
0	4	0		2	2	1		0	0	0		0	4	1
0	0	0		1	1	0		0	0	0		0	0	1
0	2	0		2	1	0		0	1	0		0	1	1
0	0	0		0	1	1		0	2	0		0	0	2
0	1	0		1	1	2		0	0	0		1	0	2
1	0	0		1	1	2		2	0	0		0	0	0
1	0	1		1	1	0		0	1	0		3	1	0
1	0	0		2	2	3		0	1	0		0	0	0
0	0	2		0	1	1		0	0	2		1	1	2
0	0	0		4	2	0		1	0	0		0	0	0
0	0	0		0	1	0		4	1	0		0	0
0	0	0		4	1	3		0	0	0		2	0
0	0	0		3	3	0		0	1	0		0	3
0	0	0		1	0	1		0	0	0		0	0
0	2	1		1	1	0		0	0	1		1	0
0	2	1		0	2	1		0	0	0		0	0
0	2	0		1	1	2		1	1	2		0	0
0	3	0		1	2	2		0	1	0		0	0
0	0	2		1	1	1		2	1	0		0	0
0	0	0		0	1	2		0	0	1		0	2
0	1	2		2	1	1		0	0	1		1	1
0	1	0		1	1	0		1	0	0		1	1
0	0	0		1	2	1		1	1	1		0	0
0	0	0		2	2	2		0	0	0		0	0
0	0	0		1	1	1		0	0	1		2	0
1	0	0		1	1	2		0	0	1		0
0	0	1		1	1	1		0	2	2		0
0	2	0		2	1	2		0	2	1		2
0	1	0		1	0	1		1	0	1		2
0	2	0		1	0	2		0	0	0
0	1	0		0	2	0		0	0	0
1	0	0		0	1	2		1	0	0
2	0	1		0	0	1		2	0	2
0	2	1		2	0	1		0	0	0
		2		1	0	2			0	0
		0		1	0	0			0	0
		1		4	1	3			0	0
		1		4	1	0			1	0
		2		2	0	1			3	2
		2		0	0	1			0	2
		1		0	0	1				0
		0		0		2				1
		0		0		4				1
		0		0		1				0
		1		0		1				1
		0		1		3				0
				1		2				1
				1		1				2
				1						0
				0						0
				1						1
				3						1
				2						3
				2						0
				0						0
				2						0
				2						0
				1						0
				2						1
				2						1
				2						0
				2						1
				2						1
				0						0
				4						0
				1						0
				1						1
				1						0
				0						1
				2						0
				3						2
				0						0
				1						0
				0						0
				1						0
				1						0
				0
				0
				1
				1
				2
				2
				0
				0
				1
				0
				1
				2
				1
				0
				1
				3
				0
				1
				2
				1
				2
				3
				2
				3
				1
				1
				0
				2
				2
				1
				0
				2
				0
				1
				1
				1
				0
				0
				0
				0
				0
				3
				4
				2
0.434	0.346	0.386719	#DIV/0!	1.17577	1.08876	0.951362		0.51	0.517787	0.448339	#DIV/0!	0.509091	0.547862	0.634454
