# Supplementary material for: Essential roles of Caspase-3 in facilitating Myc-induced genetic instability and carcinogenesis
Source: eLife journal article supplement (doi:10.7554/elife.26371), 2017-07-10
Supplement: supp [file elife_poa_e26371_Fig.1_source_data_9.xlsx]

## Sheet: Sheet1
		BJ-1 Myc				BJ-1 Casp3				BJ-1 Casp3 Myc				Cell Line	BJ-1				BJ-1 Myc				BJ-1 Casp3				BJ-1 Casp3 Myc
0		0	0	0		0	0	1		0	1	1			0.116	0.144	0.13		0.714	0.738	0.808017		0.0847784	0.078125	0.0935673		0.106509	0.130261	0.0912698
0		0	0	0		0	0	0		0	0	1		Average	0.13				0.753339				0.0854902				0.109346
1		1	0	4		0	0	0		0	0	0		Stand Dev	0.014				0.0488493				0.00774569				0.0196496
1		2	0	0		0	0	1		0	2	0		SEM	0.0080829	0	0	0	0.0282032	0	0	0	0.00447198	0	0	0	0.0113447
0		2	2	0		0	0	0		0	0	0
0		1	3	6		0	1	0		1	0	0
0		0	0	0		0	0	0		0	0	0
1		0	1	0		0	0	1		0	0	0
0		0	0	0		0	0	1		0	1	0
1		0	0	1		0	0	0		0	0	0
0		0	0	0		0	0	0		0	0	0
0		5	0	0		0	0	1		0	0	0
0		0	0	0		0	0	0		0	0	0
0		0	0	3		0	1	1		0	1	0
0		2	2	1		0	0	0		1	1	0
0		3	0	0		0	0	0		0	0	0
0		0	1	4		0	0	0		1	1	0
0		0	0	0		0	0	0		0	0	0
0		1	1	1		0	0	1		0	0	0
0		1	0	0		0	0	0		0	0	0
1		3	2	0		0	0	0		0	0	0
0		2	1	6		0	0	1		0	0	0
1		0	2	0		0	0	0		0	0	0
0		0	0	0		0	0	0		0	0	0
0		2	1	2		0	0	1		0	2	2
0		0	1	1		0	0	0		0	0	0
0		0	0	0		0	0	0		3	1	0
0		0	1	0		0	0	0		0	0	0
0		1	0	0		0	0	0		0	0	0
0		1	1	0		0	0	0		0	0	0
0		1	0	0		0	0	0		0	0	0
0		1	0	0		1	0	0		0	0	0
0		3	0	1		0	0	0		0	0	0
1		0	2	1		0	0	0		0	0	1
1		0	1	0		0	0	1		0	0	0
0		0	0	0		0	0	0		0	0	0
1		0	0	0		0	0	0		0	0	0
0		1	0	0		0	0	0		1	0	0
2		1	0	0		0	0	0		0	0	0
0		1	0	1		0	0	0		0	0	0
0		1	2	2		0	0	0		0	1	0
0		0	1	1		0	0	0		2	0	0
0		0	1	2		0	0	0		0	0	0
0		0	1	0		0	0	0		0	1	0
0		1	1	0		0	0	0		0	0	0
0		1	2	0		0	0	0		0	0	0
0		0	0	2		0	0	0		0	0	0
0		0	1	1		0	0	0		0	1	0
1		0	0	1		0	0	0		0	0	0
0		2	3	3		0	0	0		0	0	0
0		0	0	4		0	0	0		0	0	0
0		0	1	4		0	0	0		0	1	0
1		0	2	0		0	0	0		0	0	0
0		0	1	0		0	0	0		0	0	0
1		0	0	1		0	0	0		0	0	0
0		0	0	0		0	0	0		0	1	0
0		2	0	0		2	0	0		0	0	0
0		0	2	2		0	0	0		0	0	0
0		0	0	8		0	0	0		0	0	0
0		1	0	0		0	0	0		1	0	0
0		0	0	0		0	0	0		0	0	0
0		2	1	1		0	1	0		0	2	0
1		1	2	2		0	0	0		0	0	0
2		1	1	0		0	0	0		0	0	0
0		0	2	0		1	0	0		0	0	0
1		0	0	0		0	0	0		0	0	1
0		0	1	0		0	1	0		0	0	0
0		0	1	2		1	0	0		0	0	0
0		1	0	0		1	0	0		0	0	0
0		1	0	16		0	0	0		0	0	0
0		0	0	4		0	0	0		0	0	0
0		0	2	0		0	0	0		0	1	0
0		0	0	0		0	0	0		0	0	0
0		0	0	0		0	0	0		0	1	0
0		1	0	1		0	0	0		0	1	0
1		0	5	0		0	0	0		0	0	0
0		0	1	0		0	0	0		0	0	0
0		0	0	4		0	1	0		0	0	0
0		3	0	0		0	1	0		1	0	0
0		4	0	0		0	0	0		0	0	0
1		0	3	1		0	0	0		0	0	0
1		0	0	3		0	1	0		0	3	0
0		0	1	0		0	0	0		0	0	0
0		0	0	0		0	0	0		0	0	0
0		1	2	0		0	0	0		0	0	0
0		0	0	0		0	0	0		0	0	0
0		0	1	1		0	0	0		1	0	0
0		0	0	0		0	0	0		0	0	0
1		0	0	1		0	0	0		0	0	0
0		1	1	0		0	0	0		0	0	0
0		0	0	0		0	1	0		0	2	0
0		0	0	0		0	0	0		0	0	0
0		1	0	0		0	0	0		0	0	0
0		0	1	1		0	0	0		0	1	0
0		1	1	1		0	0	0		0	0	0
0		1	0	11		0	0	0		0	1	0
0		0	0	1		0	0	0		0	0	0
0		0	2	0		0	0	0		0	0	0
0		1	0	0		0	0	0		0	0	1
0		0	0	2		0	0	0		0	1	0
1		0	2	0		0	0	1		0	0	0
0		0	0	1		0	0	0		6	0	0
1		0	0	0		0	0	0		0	0	0
0		8	0	1		0	0	0		0	0	0
0		3	0	0		0	0	0		0	0	0
0		4	0	1		0	0	0		0	0	0
0		1	4	0		0	0	0		0	2	0
0		0	0	0		0	0	0		0	0	0
0		0	0	1		0	0	1		0	0	0
0		0	0	3		0	0	0		0	0	0
0		0	1	1		0	0	0		0	0	1
0		1	0	0		0	0	0		0	0	0
0		1	0	0		0	0	0		0	0	0
1		1	0	0		0	0	0		0	0	0
0		1	0	0		0	0	0		0	0	0
0		1	1	1		0	0	0		0	0	0
0		0	0	0		0	0	0		1	0	0
0		0	0	0		0	0	0		0	0	0
0		0	1	0		0	0	0		0	0	0
0		1	0	4		0	0	0		0	0	0
0		0	0	0		0	0	0		1	0	0
0		0	0	2		0	0	0		0	0	0
0		0	0	1		0	0	0		0	1	0
0		0	1	0		0	0	0		0	0	0
0		1	0	0		0	0	0		0	1	1
0		0	0	0		0	0	0		0	0	0
0		0	0	0		0	0	0		0	0	0
0		0	0	2		0	0	0		0	0	1
0		2	1	1		0	0	0		0	0	2
0		1	1	2		0	0	0		0	0	0
1		0	0	0		0	0	0		0	0	0
0		1	0	0		0	0	0		0	0	1
0		0	1	1		0	0	0		0	0	0
0		1	0	0		0	0	0		0	0	1
0		1	2	0		0	0	0		0	0	0
0		0	4	0		0	0	3		0	0	0
0		8	1	0		0	0	3		0	0	0
0		0	0	3		0	0	0		2	0	0
0		2	1	2		0	0	0		0	0	1
0		1	0	2		0	0	0		0	0	0
0		2	0	0		0	0	0		0	0	0
0		1	2	2		0	0	0		0	0	0
0		1	0	0		0	0	0		0	0	0
0		0	0	0		0	0	0		0	0	0
0		0	2	0		0	0	0		0	0	0
0		1	0	2		0	0	0		0	0	0
1		0	0	0		0	0	0		0	0	0
0		0	0	0		0	0	0		0	0	0
0		0	0	1		0	0	0		1	0	0
0		1	0	0		0	0	0		0	0	0
0		1	0	4		0	0	0		0	0	0
0		0	1	0		0	0	0		0	0	1
0		0	1	0		0	1	0		0	0	0
0		1	2	1		0	0	0		0	0	0
0		1	1	0		0	0	0		0	0	0
0		0	0	0		0	0	0		1	0	0
0		1	0	0		0	0	0		0	0	0
0		2	6	1		0	0	0		0	0	0
0		1	0	0		0	0	0		0	0	0
0		4	0	0		0	0	0		0	0	0
0		1	1	1		0	0	0		0	0	0
0		1	0	0		0	0	0		0	0	0
0		2	1	0		0	0	0		0	0	0
0		1	0	4		0	0	0		0	0	0
0		0	1	1		0	0	0		0	0	0
1		0	0	0		0	0	0		0	0	2
0		1	0	0		0	0	0		0	0	0
0		1	0	0		0	0	0		0	0	0
0		1	1	0		0	0	0		0	0	0
0		1	0	0		0	0	1		0	0	0
0		1	0	1		0	0	0		0	0	0
0		0	1	1		0	0	0		0	0	0
0		0	0	1		0	0	0		0	0	1
0		0	2	0		0	0	0		0	0	0
0		0	0	0		0	0	0		0	0	0
0		3	1	4		0	0	0		0	0	0
1		0	0	2		0	0	0		0	0	0
0		12	1	2		0	0	0		0	1	1
0		0	0	2		0	0	0		0	2	0
0		0	0	1		0	0	0		0	0	0
0		1	0	3		0	0	0		0	0	0
0		0	1	0		0	0	0		0	1	0
0		1	5	0		0	0	0		0	0	2
0		1	1	2		0	0	0		1	0	0
1		1	0	1		0	0	0		0	0	0
0		0	1	0		0	0	0		0	0	0
0		0	0	2		0	0	0		0	0	0
0		1	0	0		0	0	0		0	0	0
0		0	1	0		0	0	0		0	0	0
0		0	0	1		0	0	0		0	0	0
0		2	2	0		0	0	0		1	1	0
0		1	0	1		0	0	0		0	0	0
0		0	0	0		0	0	0		0	0	0
0		0	0	0		0	0	0		5	0	0
0		2	0	2		0	0	0		0	0	0
0		0	1	1		0	0	0		0	0	0
0		1	1	0		0	0	0		0	0	0
0		0	0	0		0	0	0		0	0	0
0		0	3	0		0	0	1		0	0	0
0		2	0	0		0	0	0		1	1	0
0		1	0	1		0	0	0		0	0	0
1		1	0	0		0	0	0		0	0	0
0		0	1	1		0	2	0		0	0	0
0		0	1	0		0	0	0		0	0	0
0		0	1	0		0	1	0		0	0	0
0		1	0	0		0	1	0		0	1	0
1		1	1	1		0	1	0		0	1	0
0		0	1	0		0	0	0		0	0	0
0		2	1	0		0	0	0		0	0	0
0		0	0	0		0	0	0		1	0	0
0		0	0	0		0	2	0		0	0	0
1		0	0	1		0	2	0		0	0	0
0		0	0	1		0	0	0		0	0	0
0		0	2	2		0	0	0		0	0	0
0		3	0	0		0	0	0		0	0	0
0		0	0	3		0	0	0		0	1	0
0		0	2	0		0	0	0		0	0	0
0		0	0	0		0	1	0		0	0	0
1		1	0	0		0	0	0		0	0	0
0		1	0	1		0	0	0		1	0	0
1		2	0	0		0	0	0		0	0	0
0		0	0	0		0	0	1		0	0	0
0		0	1	1		0	0	0		1	0	0
0		0	1	0		0	0	0		0	0	0
0		0	1	1		0	0	0		2	0	0
0		1	0	0		0	0	0		2	1	0
0		1	2	1		0	0	0		0	2	0
0		0	3	1		0	0	0		1	0	0
0		0	2	0		0	0	1		0	0	0
0		0	0	8		0	0	0		0	1	0
0		0	2	0		0	0	0		0	0	0
0		2	0	2		0	0	0		0	0	1
0		4	1	0		0	0	0		0	0	0
0		0	0	0		0	0	1		0	0	0
0		0	0	1		0	0	0		0	0	0
0		0	0	0		0	0	0		0	0	0
0		0	0	2		0	0	0		0	0	0
0		0	2	1		0	0	0		0	0	0
0		1	0	2		0	0	0		2	0	0
0		2	0	0		0	0	0		1	0	0
0		0	0	0		0	0	0		0	0	0
0		0	0	0		1	0	0		0	0	0
0		0	0	0		0	0	0		0	0	0
0		0	3	0		0	0	0		0	0	0
0		0	0	0		0	0	0		0	0	0
0		1	0	0		0	0	0		0	0	0
0		1	1	1		0	0	0		0	0	1
0		1	0	1		0	0	0		0	0	0
0		0	1	0		0	0	0		0	1	0
0		0	3	0		0	0	0		0	0	0
1		1	0	1		0	0	0		0	0	0
0		1	1	0		0	0	0		0	0	0
0		0	0	0		0	0	0		0	0	0
0		0	1	0		0	0	0		0	0	0
0		0	1	1		0	0	0		0	0	0
0		0	0	1		0	0	0		0	0	0
0		1	0	0		0	0	0		0	1	0
0		0	0	0		0	0	0		0	0	2
1		1	1	0		0	0	0		0	0	0
0		1	1	1		0	0	0		0	0	0
0		1	0	1		0	0	0		0	0	0
0		1	2	0		0	0	3		0	0	0
0		0	0	0		0	0	0		0	0	2
0		0	0	1		0	0	0		0	0	0
0		0	0	1		0	0	0		0	0	0
0		1	0	2		0	0	0		0	0	2
2		0	1	0		0	0	0		0	0	1
0		1	0	2		0	0	0		0	0	0
0		0	0	0		0	1	0		0	1	0
0		0	0	0		0	0	0		0	0	0
0		0	0	0		0	0	0		0	0	0
0		0	0	1		0	0	0		0	0	0
0		0	1	0		0	0	0		0	0	0
0		1	0	1		0	0	0		0	0	0
0		1	1	1		1	0	0		0	0	0
1		1	1	0		1	0	0		0	0	0
0		2	1	2		0	0	0		1	0	0
0		2	0	2		0	0	0		0	1	0
0		0	1	0		1	1	0		0	0	0
0		0	3	1		0	0	0		0	0	0
0		0	0	1		0	0	0		0	0	0
0		0	2	0		0	0	0		0	0	0
0		0	0	2		0	2	0		0	0	0
0		0	2	2		0	0	0		0	0	0
0		0	4	4		0	0	0		0	0	0
1		0	0	0		0	0	0		0	0	0
0		1	0	0		0	1	0		0	0	0
0		0	2	2		0	1	0		0	0	0
0		1	1	1		2	0	0		0	1	1
0		3	0	0		0	0	0		0	0	0
0		1	0	0		1	0	0		0	0	0
0		0	0	0		0	0	0		0	0	0
0		1	0	2		0	0	0		0	0	0
1		3	3	0		0	0	0		0	0	0
0		1	2	0		0	0	0		0	0	0
1		0	1	0		0	0	0		0	0	0
1		0	1	1		0	0	0		0	0	0
0		2	0	0		0	0	0		0	0	0
0		0	4	3		0	0	0		0	0	0
0		6	0	4		0	0	0		0	0	0
0		1	0	0		0	0	0		0	0	1
0		0	0	1		0	0	0		0	0	0
1		0	1	1		0	1	1		0	0	0
0		0	0	3		0	0	0		0	0	0
0		1	0	1		0	1	0		0	0	0
1		0	0	0		0	0	0		0	0	0
0		0	0	0		0	0	0		0	1	0
0		1	0	2		0	0	0		1	0	0
0		2	1	0		0	0	0		0	0	0
0		0	1	0		0	1	3		0	0	0
0		0	0	1		0	0	3		1	0	0
0		3	0	1		0	0	0		0	0	0
0		0	0	1		0	0	0		0	1	0
1		2	1	0		0	1	0		0	0	0
0		0	0	0		0	0	1		0	0	0
0		0	1	4		0	0	0		0	0	0
0		0	0	2		0	0	0		0	0	0
0		1	1	2		0	0	0		0	0	0
0		0	0	2		0	0	0		0	0	0
0		2	1	1		0	0	0		0	0	0
1		1	0	3		0	0	0		0	0	1
0		0	0	0		0	0	0		0	0	0
0		3	1	0		0	0	0		0	0	0
0		0	0	2		0	0	0		0	0	0
0		0	2	1		0	0	0		0	0	0
0		3	0	0		0	0	3		0	1	0
0		0	1	2		0	0	0		1	0	0
0		0	1	0		0	0	0		0	0	0
0		1	4	0		0	0	0		0	0	0
0		0	3	1		0	0	0		0	0	1
0		1	0	0		0	0	0		0	2	0
0		0	0	1		0	0	0		0	0	0
0		0	1	0		0	0	0		0	0	0
0		0	2	0		0	0	0		0	0	0
0		1	0	2		0	0	0		0	0	0
0		0	2	1		0	0	0		0	0	0
0		0	1	0		0	0	0		0	0	0
1		0	0	0		0	0	0		0	0	0
0		1	0	0		0	0	0		0	0	0
0		1	1	0		0	0	0		0	0	0
0		0	0	1		0	0	0		0	0	0
0		0	0	0		0	0	0		0	0	0
1		0	1	1		0	0	0		0	0	0
0		1	0	0		0	0	0		0	0	0
0		1	0	0		0	0	0		0	0	0
0		0	4	1		0	0	0		0	0	0
0		0	1	0		0	0	0		0	0	0
1		1	1	1		0	0	0		1	0	0
0		0	4	1		0	0	0		0	0	0
0		0	0	0		0	0	0		0	0	0
0		0	0	0		0	0	0		0	0	0
0		1	5	0		2	0	0		0	0	0
0		0	0	0		0	0	0		0	0	0
0		0	1	2		0	0	0		0	0	0
1		2	0	1		2	0	0		0	0	0
0		1	0	1		0	0	0		0	0	0
1		0	0	1		0	0	0		0	0	1
0		1	0	0		0	0	0		0	0	0
0		1	1	0		0	0	0		0	0	0
0		1	0	1		0	0	0		0	0	0
0		0	0	0		0	0	0		0	0	0
0		0	0	2		0	0	0		0	0	0
0		4	0	0		0	0	0		0	0	0
0		2	2	0		0	0	0		0	0	0
0		2	0	0		0	0	0		0	0	1
0		2	1	3		0	0	0		0	0	0
0		1	0	0		0	0	0		1	0	0
0		3	2	1		0	1	0		0	0	0
0		0	0	1		0	0	0		0	0	0
0		0	1	1		0	0	0		0	1	0
0		2	1	0		0	0	0		0	0	0
0		1	0	0		0	0	0		0	0	0
0		0	0	4		0	0	0		0	0	0
0		2	0	2		0	0	0		0	0	0
0		0	2	2		0	0	0		0	0	0
0		0	1	2		0	0	3		0	0	0
0		1	4	1		0	0	0		0	0	0
0		0	4	3		0	0	0		0	0	1
0		1	6	0		0	0	1		0	0	1
0		0	0	0		0	0	0		0	0	0
0		0	1	2		0	0	1		0	0	0
0		2	0	1		0	0	0		0	0	0
0		1	1	0		0	0	0		0	0	0
0		0	2	2		0	0	0		0	0	0
1		0	1	0		0	0	0		0	0	0
0		0	0	0		0	0	0		0	0	0
0		0	0	1		0	0	0		0	1	0
1		1	0	0		0	0	0		0	1	0
0		0	0	1		0	0	0		0	0	1
1		1	1	0		0	0	0		0	0	0
0		0	0	0		0	0	0		0	0	0
0		0	0	2		0	0	0		0	0	0
0		0	0	1		0	0	0		0	0	0
0		1	2	0		0	0	0		0	0	0
0		1	2	0		0	0	0		0	0	0
0		1	0	0		0	0	0		0	0	0
0		0	3	0		0	0	0		1	0	0
0		1	0	1		0	0	0		0	0	0
1		0	0	0		0	0	0		0	0	2
0		1	2	1		0	0	0		0	0	0
0		0	2	0		0	0	0		1	0	0
0		0	1	0		1	0	0		0	0	0
0		2	0	0		0	0	0		0	0	0
0		0	0	1		0	0	0		0	0	0
0		0	1	0		0	0	0		0	0	0
0		0	0	0		0	0	0		0	0	0
0		1	1	0		1	0	0		0	0	0
0		0	0	0		0	0	0		0	0	0
0		0	4	2		0	0	1		1	0	1
1		2	0	0		0	0	1		0	1	0
0		0	0	1		2	0	0		0	0	0
1		0	1	1		0	0	0		0	1	0
0		2	4	0		0	0	0		0	0	0
0		0	0	1		0	0	0		0	0	0
0		0	0	1		0	0	0		0	0	0
0		1	0	0		0	0	0		0	0	0
0		0	1	0		0	0	0		0	0	0
0		1	2	0		2	0	0		0	0	0
0		0	0	1		0	0	0		0	0	0
0		0	0	0		1	0	0		0	0	0
0		1	0	0		0	0	0		0	1	0
0		1	0	0		0	0	0		0	0	0
0		0	1	0		0	0	2		0	0	0
0		0	1	1		0	0	0		0	0	0
1		0	0	1		0	0	0		0	0	0
0		0	0	0		1	1	0		0	0	0
0		0	0	0		0	0	0		0	0	0
0		0	0	0		0	0	0		0	0	0
0		0	1	0		0	0	0		0	0	0
0		1	0	1		0	1	0		0	0	0
0		0	0	1		1	0	0		0	1	1
1		0	2	1		0	0	0		0	1	0
0		2	0	0		0	2	0		0	1	0
1		0	0	0		0	0	0		0	0	0
0		0	1	1		0	0	0		0	0	0
0		0	2	0		0	1	0		0	0	0
0		5	1	0		1	0	0		0	0	0
0		0	0	1		0	0	0		0	0	0
0		0	0	0		0	0	1		0	0	0
0		0	0	0		0	1	0		0	0	0
0		1	0	0		0	0	0		1	0	0
0		0	0	0		0	0	0		0	0	0
0		0	1	3		1	0	0		0	0	0
0		0	4	0		0	1	0		0	0	0
0		1	3	1		0	0	0		0	0	0
0		0	1	1		1	0	0		0	0	0
0		0	2	0		0	0	0		0	0	0
0		3	0	0		0	0	0		0	0	0
0		0	0	1		0	1	0		0	0	0
0		1	0	0		0	0	0		0	0	0
0		1	0	3		0	0	0		0	0	0
0		2	1	0		0	0	0		0	0	0
0		0	0	0		0	0	0		0	0	0
0		0	1	2		0	0	0		0	0	0
0		0	0	1		1	0	0		0	0	0
0		0	0	0		0	0	0		0	0	0
0		1	1	0		0	0	0		0	0	0
0		0	0	0		1	0	0		0	0	0
1		0	2	0		0	0	0		0	0	0
1		2	0	7		0	1	0		0	0	0
0		1	1	0		0	0	0		0	0	0
0		0	0	1		0	0	0		0	0	0
0		0	0	0		0	0	0		0	0	0
0		1	0	1		0	1	0		0	0	0
0		0	2	2		0	0	1		0	0	0
0		2	0	0		1	0	0		0	0	0
0		2	0	0		0	0	0		0	0	0
0		1	2	1		0	0	0		0	0	0
0		0	1	0		0	0	0		0	0	0
0		1	2	1		1	0	0		0	0	0
0		0	5	0		0	0	0		0	0	0
0		3	0	0		0	0	0		0	0	0
0		1	6	0		0	0	0		0	0	0
0		1	0	1		0	0	0		0	0	0
0		1	0			0	0	0		0	0	0
0		0	0			0	0	0		0	0	0
0		0	0			0	0	0		0	0	0
0		0	0			0	0	0		0	0	0
0		0	4			0	0	0		0	0	0
1		3	4			0	0	0		0	1	0
0		1	0			0	0	0		0	0	0
0		0	4			0	0	0		0	0	0
0		0	1			0	0	0		0	0	0
0		2	1			0	0	0		1	0	0
0		1	0			0	0	0		0	0	0
0		0	0			0	0	0		0	0	0
0		1	0			0	0	0		0	0	0
0		2	5			0	0	0		0	0	0
0		2	1			0	0	0		0	0	0
0		0	0			0	0	0		0	0	0
0		2	0			0	0	0		0	0	0
0		1	0			0	0	0		0	0	0
0		2	0			0	0	0		0	0	0
0		0	3			2	0	0		0	0	0
0		1	0			0	0	0		0	0	0
0		2	1			1	0	0		0	0	0
0		1	1			0	0	0		0	0	0
0		5	0			0	0	0		0	0	0
0		0	0			0	0	0		0	0	2
0		0	0			1	0	0		0		0
						0	0	0		0		0
						1	0	0		0		0
						0	0	0		0		0
						0	0	0		0		0
						0	0	0		0
						0	0	0		0
						0	0	0		0
						0	0	0
						0	0	0
						1	0	0
						1	0	0
						0	0	0
						1		0
						0
						1
						2
						0
						0
						0
