# Supplementary material for: Essential roles of Caspase-3 in facilitating Myc-induced genetic instability and carcinogenesis
Source: eLife journal article supplement (doi:10.7554/elife.26371), 2017-07-10
Supplement: supp [file elife_poa_e26371_Fig.1_source_data_10.xlsx]

## Sheet: Sheet1
BJ-1	Chromosome	Aberration	Chromosome	Aberration	Chromosome	Aberration		BJ Myc	Chromosome	Aberration	Chromosome	Aberration	Chromosome	Aberration		BJ Casp3	Chromosome	Aberration	Chromosome	Aberration	Chromosome	Aberration		BJ Casp3 myc	Chromosome	Aberration	Chromosome	Aberration	Chromosome	Aberration
	46	0	46	0	46	0			49	1	46	0	45	0			46	0	46	0	46	0			46	0	46	0	46	0
	46	0	46	0	46	0			47	0	46	0	46	0			46	0	46	0	46	0			46	0	47	1	47	0
	46	0	46	0	46	0			46	0	45	0	40	0			46	0	46	0	46	0			46	0	46	0	46	0
	46	0	46	0	46	0			46	1	44	0	36	0			46	0	46	0	46	0			45	0	45	0	45	0
	46	0	45	0	45	0			46	0	46	0	52	1			45	0	45	0	45	0			45	0	45	0	45	0
	45	0	46	0	46	0			46	0	45	1	47	0			46	0	46	0	46	0			46	0	46	0	46	0
	46	0	46	0	46	0			44	0	46	0	44	0			46	0	46	0	46	0			46	0	46	0	47	0
	46	0	46	0	46	0			40	1	44	0	46	0			46	0	46	0	46	0			46	0	46	0	46	0
	46	0	46	0	46	0			45	0	46	0	46	0			46	0	46	1	46	0			46	0	46	0	46	0
	46	0	46	0	46	0			46	0	45	0	45	0			46	0	46	0	46	0			46	0	46	0	46	0
	46	0	46	0	46	0			40	0	45	0	47	0			46	0	46	0	46	0			47	0	47	0	47	0
	46	0	46	0	46	0			36	0	46	0	41	0			46	0	46	0	46	0			46	0	46	0	46	0
	46	0	45	0	45	0			52	1	44	0	46	1			45	0	45	0	45	0			45	0	45	0	46	0
	46	0	46	0	46	0			47	0	44	1	45	0			46	0	46	0	46	0			46	0	46	0	46	0
	45	0	46	0	46	0			44	0	41	0	49	0			46	0	46	0	46	0			46	0	46	0	46	0
	46	0	46	0	46	1			46	0	46	1	43	1			46	0	46	0	46	0			46	0	45	0	45	1
	46	0	46	0	46	0			46	0	45	0	50	0			46	0	46	0	46	0			46	0	46	0	46	0
	43	0	46	0	46	0			45	0	49	0	45	0			46	0	46	0	46	0			46	0	46	0	46	0
	47	0	46	0	46	0			47	0	43	1	46	0			46	0	46	0	46	0			46	0	46	0	46	0
	46	0	46	0	46	0			45	0	50	0	47	1			46	0	46	0	46	0			46	0	46	0	46	0
	46	0	46	0	46	0			39	0	45	0	46	0			46	0	46	0	46	0			46	0	46	0	46	0
	46	0	46	0	46	0			46	0	46	0	46	0			46	0	46	0	46	0			46	0	45	0	45	0
	46	0	46	0	46	0			46	0	47	1	47	1			46	0	46	0	46	0			46	0	46	0	46	0
	46	0	46	0	46	0			46	1	46	0	45	0			46	0	46	0	46	0			46	0	46	0	46	0
	46	0	46	0	46	0			48	0	46	0	46	0			46	0	46	0	46	0			46	0	46	0	46	0
	45	1	46	0	46	0			46	0	47	1	46	0			46	0	46	0	46	0			46	0	46	0	46	0
	46	0	47	0	47	0			46	0	45	0	43	0			47	0	47	0	47	0			47	0	47	0	46	0
	46	0	46	0	46	0			45	0	46	0	45	0			46	0	46	0	46	0			45	0	45	0	45	1
	46	0	46	0	46	0			46	0	46	0	45	0			46	0	46	0	46	0			46	0	46	0	46	0
	46	0	46	0	46	0			46	0	45	0	43	0			46	0	46	0	46	0			46	0	46	0	46	0
	46	0	46	0	46	0			43	0	43	0	43	0			46	0	46	0	46	0			46	0	46	0	47	0
	46	0	46	0	46	0			45	0	46	0	47	0			46	0	46	0	46	0			46	0	46	0	47	0
	46	0	46	0	46	0			45	0	46	0	45	1			46	0	46	0	46	0			47	0	47	0	47	0
	46	0	46	0	46	0			43	0	41	0	46	0			46	0	46	0	46	0			46	0	46	0	46	0
	45	0	46	0	46	0			43	0	39	0	43	0			46	0	46	0	46	0			46	0	46	0	46	0
	46	0	46	0	46	0			47	0	44	0	42	0			46	0	46	0	46	0			46	0	46	0	46	0
	46	0	46	0	46	0			45	1	46	1	46	0			46	0	46	0	46	0			46	0	46	0	46	0
	46	0	46	0	46	0			46	0	45	0	40	0			46	0	46	0	46	0			46	0	46	0	46	0
	46	0	46	0	46	0			43	0	39	0	40	1			46	0	46	0	46	0			46	0	47	0	47	0
	46	0	44	0	44	0			42	0	43	0	43	0			44	0	44	0	44	0			44	0	44	0	44	0
	45	0	46	0	46	0			46	0	45	0	65	0			46	0	46	0	46	0			46	0	46	0	46	0
	46	0	46	0	46	0			40	0	45	0	45	0			46	0	46	0	46	0			46	0	46	0	46	0
	46	0	46	0	46	0			40	1	46	1	48	0			46	0	46	0	46	0			46	0	46	0	46	0
	46	0	46	0	46	0			43	0	49	0	40	0			46	0	46	0	46	0			46	0	46	0	46	0
	46	0	46	0	46	0			65	0	47	0	52	0			46	0	46	0	46	0			46	0	46	0	46	0
	46	0	46	0	46	0			45	0	46	0	45.4	0.155556			46	0	46	0	46	0			46	0	45	0	45	0
	46	0	46	0	46	0			48	0	46	0					46	0	46	0	46	0			46	0	46	0	46	0
	45	0	46	0	46	0			40	0	45	0					46	0	46	0	46	0			46	0	46	0	46	0
	46	0	46	0	46	0			52	0	44	0					46	0	46	0	46	0			46	0	46	0	46	0
	46	0	45	0	45	0			45.2653	0.142857	46	0					45	0	45	0	45	0			45	0	46	0	46	0
	45.84	0.02	45.92	0	45.92	0.02					45.12	0.16					45.92	0	45.92	0.02	45.92	0			45.92	0	45.92	0.02	45.98	0.04
																													0.02	0.04
												0.155556
