# Supplementary material for: Essential roles of Caspase-3 in facilitating Myc-induced genetic instability and carcinogenesis
Source: eLife journal article supplement (doi:10.7554/elife.26371), 2017-07-10
Supplement: supp [file elife_poa_e26371_Fig.2_source_data_1.xlsx]

## Sheet: Sheet1
Replicate	Number of Colones per Replicate
	Vector Control	MCF10A Myc	Casp3 KO	Casp3 Myc
1	10	125	9	12
1	12	115	4	10
1	6	132	2	9
2	6	102	2	9
2	10	93	1	13
2	4	76	6	4
3	12	101	9	9
3	10	85	4	13
3	19	112	2	4
4	6	101	2	12
4	10	119	1	10
4	4	74	6	9
5	10		2	5
5	4		3	6
5	6		2	17
6	25		9
6	31		2
			4
	10.8824	102.917	3.88889	9.46667
	7.55714	18.6082	2.84786	3.6619
	1.83287	5.37172	0.671247	0.945499
