# Supplementary material for: Essential roles of Caspase-3 in facilitating Myc-induced genetic instability and carcinogenesis
Source: eLife journal article supplement (doi:10.7554/elife.26371), 2017-07-10
Supplement: supp [file elife_poa_e26371_Fig.2_source_data_3.xlsx]

## Sheet: Sheet1
Vector Control	Tumor Size mm3
Day	7	11	14	18	21	25	28	32	35	39	42	46	49	53	56	59
1	0	0	0	0	0	0	0	0	0	0	0	0	0	0	0	0
2	0	0	0	0	0	0	0	0	0	0	0	0	0	0	0	0
3	0	0	0	0	0	0	0	0	0	0	0	0	0	0	0	0
4	0	0	0	0	0	0	0	0	0	0	0	0	0	0	0	0
5	0	0	0	0	0	0	0	0	0	0	0	0	0	0	0	0
6	0	0	0	0	0	0	0	0	0	0	0	0	0	0	0	0
7	0	0	0	0	0	0	0	0	0	0	0	0	0	0	0	0
8	0	0	0	0	0	0	0	0	0	0	0	0	0	0	0	0
Myc	Tumor Size mm3
Day	7	11	14	18	21	25	28	32	35	39	42	46	49	53	56	59
1	0	0	0	0	3.402	3.402	4.6	6.776	10.3125	17.298	24.624	30.324	47.068	56.3945	71.944	74.06
2	0	0	0	5	10.9375	18	25.5915	30.625	43.706	62.9565	73.75	90.75	109.8	113.133	118.354	122.4
3	0	0	0	0	2.888	5.0715	10.08	16.3995	25.725	38.663	45.3005	59.904	67.5	70.227	73.008	78.732
4	0	0	0	3.402	3.402	3.402	20.181	26.136	38.232	49.5895	57.33	71.944	84.035	88.75	91.035	98.315
5	0	0	0	0	0	0	0	0	0	1.6875	1.6875	2.304	2.56	3.564	4.5125	6.615
6	0	0	0	1.6804	4.1259	5.9751	12.0905	15.9873	23.5951	34.0389	40.5384	51.0452	62.1926	66.4136	71.7707	76.0244
7	0	0	0	0	0	0	0	0	0	0	0	0	0	0	0	0
8	0	0	0	0	0	0	0	0	0	0	0	0	0	0	0	0
Myc Average	0	0	0	1.2603	3.09443	4.48133	9.06788	11.9905	17.6963	25.5292	30.4038	38.2839	46.6444	49.8102	53.828	57.0183
Caspase 3KO + Myc	Tumor Size mm3
Day	7	11	14	18	21	25	28	32	35	39	42	46	49	53	56	59
1	0	0	0	0	0	0	0	0	0	0	0	0	0	0	0	0
2	0	0	0	0	0	0	0	0	0	0	0	0	0	0	0	0
3	0	0	0	0	0	0	0	0	0	0	0	0	0	0	0	0
4	0	0	0	0	0	0	0	0	0	0	0	0	0	0	0	0
5	0	0	0	0	0	0	0	0	0	0	0	0	0	0	0	0
6	0	0	0	0	0	0	0	0	0	0	0	0	0	0	0	0
7	0	0	0	0	0	0	0	0	0	0	0	0	0	0	0	0
8	0	0	0	0	0	0	0	0	0	0	0	0	0	0	0	0
