# Supplementary material for: Essential roles of Caspase-3 in facilitating Myc-induced genetic instability and carcinogenesis
Source: eLife journal article supplement (doi:10.7554/elife.26371), 2017-07-10
Supplement: supp [file elife_poa_e26371_Fig.3_source_data_1.xlsx]

## Sheet: Sheet1
Vector Control							MCF10+Myc							Casp3+Myc
Total Cells	Nuclear EndoG	Total Cells	Nuclear EndoG	Total Cells	Nuclear EndoG		Total Cells	Nuclear EndoG	Total Cells	Nuclear EndoG	Total Cells	Nuclear EndoG		Total Cells	Nuclear EndoG	Total Cells	Nuclear EndoG	Total Cells	Nuclear EndoG
44	0	46	1	56	1		24	4	43	9	79	8		56	0	47	0	55	0
33	1	42	3	80	0		30	2	42	6	50	7		59	1	62	0	67	0
51	4	33	0	98	2		40	5	19	1	35	5		48	0	52	1	57	0
33	0	30	2	61	1		20	0	33	3	68	3		68	0	54	0	62	0
45	1	33	1	104	3		33	7	35	4	95	6		51	0	64	0	55	0
36	2	43	0	78	0		21	8	16	2	106	7		75	1	79	0	68	1
40	1	42	0				34	8	8	2	70	20		63	0	68	0	56	0
37	0	31	0				21	4	65	7						78	1	64	0
41	0	54	0				17	5	57	4
37	0	83	1				12	1	63	4
28	1						44	5	51	5
							38	4	75	6
							35	1
							32	3
							26	1
							30	5
							52	4
% Positive	0.0235294		0.0183066		0.0146751			0.131631		0.104536		0.111332			0.0047619		0.00396825		0.00206612
Standard Dev	0.00445094							0.0140967							0.00138536
SEM	0.00256975							0.00813875							0.000799836
