# Supplementary material for: Essential roles of Caspase-3 in facilitating Myc-induced genetic instability and carcinogenesis
Source: eLife journal article supplement (doi:10.7554/elife.26371), 2017-07-10
Supplement: supp [file elife_poa_e26371_Fig.3_source_data_2.xlsx]

## Sheet: Sheet1
			EndoG				EndoG+Myc				Cell Line	MCF10a				Myc				EndoG				EndoG+Myc
0	0		0	0	0		3	0	0			0.434	0.346	0.386719		1.17577	1.08876	0.951362		0.31524	0.384946	0.327801		0.36	0.396304	0.314168
0	1		0	0	0		3	0	0		Average	0.388906				1.07196				0.342662				0.356824
0	0		0	0	0		2	0	0		Stand Dev	0.0440408				0.113142				0.0371535				0.0411598
0	0		0	1	0		2	0	1		SEM	0.0254269	0	0		0.0653225	0	0		0.0214506	0	0	0	0.0237636	0	0
1	1		0	0	0		2	0	0
3	0		1	0	0		2	0	0
0	1		0	0	0		2	1	0
1	1		1	0	0		2	0	0
1	0		0	0	3		2	1	0
0	1		0	1	0		2	0	0
0	0		0	2	1		2	0	0
2	0		0	0	0		2	0	0
1	2		0	1	0		2	0	0
3	1		0	0	0		2	0	0
1	2		0	0	0		2	0	1
1	1		0	0	0		2	0	0
0	1		2	0	0		2	0	0
3	0		0	0	0		2	0	0
2	1		0	0	1		2	0	0
1	0		0	0	0		2	0	0
1	0		0	0	1		2	0	0
1	0		0	0	0		2	0	1
0	1		0	0	0		1	0	0
1	0		0	0	3		1	0	0
1	0		0	0	1		1	3	0
2	1		1	4	0		1	0	0
2	3		0	0	0		1	0	2
2	0		0	0	2		1	0	0
0	1		0	0	0		1	2	0
1	0		2	1	1		1	0	0
2	1		1	0	0		1	0	0
1	1		0	0	0		1	0	1
1	0		0	0	0		1	0	0
0	3		0	0	0		1	0	0
0	0		0	0	0		1	0	0
2	1		0	0	1		1	1	1
1	1		0	0	0		1	0	0
1	0		0	0	1		1	0	1
0	0		1	0	0		1	0	0
2	1		0	0	0		1	0	1
1	1		0	0	0		1	0	0
2	0		0	0	0		1	0	0
1	2		0	1	1		1	0	0
1	0		0	0	0		1	0	0
0	1		2	0	0		1	0	0
2	1		0	0	0		1	0	0
2	0		0	0	0		1	0	0
1	0		0	2	0		1	0	0
1	1		0	0	1		1	0	0
0	1		1	0	0		1	0	0
2	0		3	0	0		1	3	0
1	0		0	2	1		1	4	0
2	0		0	0	0		1	2	0
1	1		0	0	0		1	1	0
1	1		1	0	0		1	0	0
1	1		0	0	0		1	0	0
2	0		2	0	0		1	0	0
2	1		0	0	0		1	0	0
1	1		1	0	0		1	0	0
2	0		0	1	0		1	0	0
1	1		0	0	0		1	0	4
2	1		0	0	0		1	1	0
1	0		0	1	0		1	2	0
1	0		0	0	1		1	0	0
1	1		1	0	0		1	0	1
1	2		1	0	4		1	2	0
0	1		0	0	0		1	0	0
3	2		0	0	0		1	1	2
1	0		0	0	0		1	2	0
1	0		0	0	0		1	0	0
1	1		1	0	1		1	4	4
1	0		0	0	0		1	0	0
1	0		0	0	0		1	0	0
1	2		0	0	0		1	0	0
1	1		0	0	1		1	0	0
0	1		0	0	1		1	1	0
0	0		0	0	1		1	0	0
0	0		0	0	0		1	0	0
1	1		0	0	0		1	0	0
1	0		2	1	0		1	0	0
0	1		0	1	1		1	0	0
0	1		0	0	0		1	0	0
1	1		0	1	0		1	0	2
0	1		2	0	0		1	0	0
1	3		0	0	0		1	0	0
1	0		0	0	0		1	0	0
1	0		0	1	0		1	1	0
2	1		0	0	0		1	1	0
1	0		0	0	0		1	0	0
2	2		1	2	0		1	0	0
1	2		0	1	1		1	2	0
1	1		0	0	0		1	0	0
0	1		0	1	0		1	0	0
2	2		0	0	0		1	0	0
1	1		0	0	0		1	0	0
1	1		0	2	0		1	0	0
3	0		0	1	0		1	0	1
1	2		1	0	0		1	0	0
2	0		0	1	0		1	2	1
2	2		0	0	0		1	0	0
1	1		0	0	0		1	0	0
1	0		1	0	0		1	2	3
1	1		2	0	2		1	0	0
1	0		0	0	1		1	0	0
1	1		1	0	1		1	0	1
2	2		4	0	1		1	0	0
1	0		0	0	2		1	1	0
2	0		0	0	0		1	0	4
0	0		0	0	0		1	0	2
3	2		0	0	0		1	3	4
0	0		0	1	0		1	2	2
2	0		0	0	0		1	2	0
4	0		0	1	0		1	0	0
1	0		0	0	0		1	0	0
1	1		0	0	3		1	2	0
1	0		1	0	0		1	0	0
2	1		1	0	0		1	0	0
1	0		0	0	0		1	1	0
1	1		0	1	1		1	1	0
0	0		0	1	1		1	0	0
1	0		0	0	0		1	0	0
1	1		0	0	0		1	0	0
0	1		2	1	0		1	0	5
1	0		0	1	0		1	0	0
1	1		0	0	0		1	0	0
0	1		2	0	0		1	0	0
0	0		0	0	0		1	0	2
1	0		0	0	1		1	0	0
0	0		0	0	0		1	3	0
0	1		0	0	0		1	0	0
1	3		0	0	0		1	0	0
1	0		0	1	0		1	3	0
1	0		0	0	0		1	2	0
1	1		0	0	0		1	0	1
1	0		0	0	2		1	0	1
1	1		0	0	0		1	0	0
1	1		0	0	0		1	0	0
0	0		0	1	1		1	0	0
1	0		0	0	0		1	0	0
1	3		0	0	0		1	0	0
1	0		1	0	0		1	0	0
1	0		0	0	0		1	0	2
0	1		0	1	2		1	0	2
2	0		0	0	3		1	0	1
1	1		0	0	0		1	3	0
0	2		1	1	0		1	1	0
1	1		0	1	1		1	0	0
2	1		2	0	0		1	0	0
2	0		2	0	1		1	0	0
0	0		1	0	2		1	0	0
1	0		0	0	1		1	0	1
2	2		1	0	0		1	0	0
1	1		0	0	0		1	1	0
1	0		0	0	0		1	0	0
1	1		0	1	1		1	0	0
1	0		0	0	1		1	0	1
1	1		0	0	0		0	2	0
1	1		0	2	0		0	0	0
2	0		0	0	0		0	0	0
0	0		0	0	0		0	1	0
2	0		1	0	0		0	2	0
1	2		0	0	0		0	0	0
0	0		1	1	2		0	0	5
0	0		1	0	0		0	0	7
0	2		1	2	0		0	2	0
0	0		0	0	0		0	0	0
2	1		0	0	2		0	0	0
0	0		0	0	1		0	1	0
0	0		0	1	0		0	0	0
3	0		1	0	0		0	0	0
1	2		1	0	0		0	0	0
2	2		1	0	0		0	0	0
1	0		0	0	0		0	0	0
1	1		0	0	0		0	0	0
1	1		0	0	0		0	0	0
2	0		0	3	0		0	0	0
2	0		0	0	0		0	3	0
2	3		1	0	0		0	4	0
0	0		1	1	0		0	0	0
3	0		0	4	1		0	0	0
1	1		0	4	0		0	0	0
1	3		1	2	1		0	0	0
1	0		0	2	0		0	0	0
1	0		0	0	1		0	0	0
1	2		0	0	0		0	0	2
0	1		0	0	0		0	12	1
1	2		0	0	1		0	0	0
0	1		1	4	2		0	0	0
1	2		1	0	0		0	1	0
1	0		0	1	0		0	0	0
1	0		0	0	0		0	0	0
1	3		0	0	0		0	0	2
2	0		1	0	0		0	1	1
2	0		1	0	0		0	0	0
1	2		1	0	0		0	0	0
1	0		1	0	0		0	0	0
3	1		2	1	1		0	1	0
1	2		0	0	1		0	2	0
1	0		1	2	0		0	0	1
0	2		0	3	2		0	0	0
1	1		0	1	0		0	2	0
0	1		0	0	0		0	0	0
1	0		0	0	0		0	0	0
1	0		0	0	0		0	1	0
1	1		0	0	2		0	3	0
2	0		0	0	0		0	3	0
1	3		0	0	0		0	0	0
1	2		0	0	0		0	0	0
1	0		0	0	0		0	1	1
1	0		0	0	0		0	0	1
1	0		0	2	1		0	0	0
1	2		0	0	1		0	1	0
1	0		0	0	0		0	0	1
2	0		0	0	0		0	0	0
1	0		0	0	0		0	0	0
2	1		0	0	0		0	0	0
2	0		0	1	0		0	2	0
0	2		0	0	0		0	0	0
1	0		0	0	0		0	2	0
1	2		0	0	1		0	0	0
0	2		0	4	0		0	0	0
2	0		1	0	1		0	0	0
2	0		0	0	0		0	0	0
1	2		0	1	4		0	1	0
1	1		0	0	0		0	1	0
1	0		0	0	0		0	0	1
2	0		3	0	0		0	0	0
2	0		0	0	0		0	0	1
1	1		0	1	0		0	0	0
0	0		0	0	0		0	3	0
1	0		0	0	0		0	0	0
0	0		0	0	0		0	3	2
1	1		1	0	0		0	3	0
1	0		0	0	0		0	0	0
2	2		0	0	0		0	0	0
1	1		0	0	0		0	0	0
2	0		1	0	0		0	0	0
2	1		0	1	1		0	0	0
2	0		0	4	1		0	0	0
1	2		2	0	0		0	4	0
0	1		1	0	0		0	0	0
0	1		2	0	2		0	0	0
0	3		0	0	0		0	0	1
2	2		1	1	0		0	2	1
2	0		0	0	0		0	0	0
2	1		0	0	1		0	0	0
1	1		0	0	0		0	0	0
1	0		1	0	0		0	0	0
1	0		0	0	0		0	0	0
2	2		0	0	0		0	0	0
2	0		0	2	3		0	0	0
2	1		0	0	0		0	0	0
0	0		0	2	0		0	0	0
0	2		0	2	0		0	0	1
1	1		1	0	1		0	1	2
2	1		0	0	2		0	0	0
1	0		0	0	0		0	0	0
4	0		0	0	0		0	0	1
0	3		0	0	0		0	0	1
1	1		0	0	0		0	0	0
1	1		1	0	2		0	0	0
1	0		4	1	0		0	0	0
1	2		0	1	0		0	0	0
1	0		0	0	0		0	0	0
2	2		0	0	0		0	1	0
1	1		0	0	0		0	0	1
0	3		0	0	0		0	0	0
0	0		0	0	0		0	0	0
2	0		0	0	1		0	0	2
3	0		0	0	0		0	0	0
1	1		0	1	0		0	0	0
0	1		0	0	0		0	2	0
1	0		3	0	0		0	0	1
1	1		0	0	1		0	0	0
2	0		0	0	1		0	0	0
0	1		0	1	1		0	0	0
1	3		0	0	1		0	0	0
1	0		0	2	0		0	0	0
1	2		0	0	0		0	0	0
2	1		1	0	0		0	0	0
2	1		0	0	0		0	0	0
1	2		0	0	0		0	0	2
1	1		0	0	0		0	0	0
2	2		0	3	0		0	1	0
1	0		0	1	1		0	0	0
2	0		1	0	0		0	0	1
1	2		0	0	0		0	0	0
1	0		0	0	0		0	0	1
1	3		0	2	0		0	0	0
1	2		0	0	0		0	0	0
3	1		0	0	1		0	0	0
2	2		0	0	4		0	0	0
1	1		0	3	0		0	3	0
1	2		0	0	1		0	0	0
0	2		0	0	0		0	0	1
1	0		1	0	0		0	0	0
0	2		0	0	0		0	0	0
1	2		0	0	0		0	1	0
2	1		0	0	0		0	0	0
2	1		0	0	0		0	0	0
3	2		0	1	0		0	0	1
1	2		0	1	1		0	0	0
2	2		0	0	0		0	1	1
0	4		1	0	0		0	0	0
0	2		1	1	0		0	0	1
2	2		2	0	0		0	0	1
2	1		0	2	0		0	0	1
2	0		0	0	0		0	1	0
1	0		0	0	0		0	0	1
0	0		0	2	2		0	0	0
1	0		0	0	1		0	1	0
1	2		0	0	0		0	1	0
1	1		0	0	0		0	0	0
2	0		0	0	4		0	0	0
1	2		0	0	0		0	0	0
1	2		0	1	0		0	0	1
1	1		0	0	2		0	0	0
0	1		1	4	0		0	0	0
0	1		0	0	1		0	0	0
2	2		1	0	0		0	0	0
1	0		1	0	1		0	1	0
1	1		0	4	0		0	0	0
2	0		0	0	0		0	0	0
1	2		0	0	0		0	0	0
1	3		0	0	4		0	0	0
1	1		0	0	0		0	0	1
1	0		3	0	0		0	0	0
1	1		0	0	0		0	0	0
0	2		0	0	0		0	1	0
3	0		1	4	0		0	0	0
1	0		0	0	0		0	0	0
1	3		0	1	0		0	1	1
1	2		0	1	0		0	0	0
2	4		2	0	1		0	0	0
2	0		0	0	0		0	0	0
0	1		4	0	0		0	0	0
1	0		1	0	0		0	0	0
2	2		0	0	0		0	0	0
0	0		0	0	0		0	0	0
1	0		0	1	0		0	1	0
3	0		2	0	1		0	1	0
2	1		0	0	1		0	0	1
2	0		0	0	0		0	0	0
1	0		0	0	0		0	0	0
2	1		2	0	0		0	0	0
0	0		0	0	1		0	1	0
0	4		0	0	0		0	1	0
0	0		0	1	0		0	1	0
2	1		0	0	0		0	1	1
2	0		0	0	1		0	0	0
2	2		0	0	1		0	0	1
1	1		2	0	0		0	0	0
0	1		0	0	0		0	1	0
0	0		0	0	0		0	0	0
1	2		0	4	3		0	0	0
2	3		0	0	0		0	0	0
1	3		0	0	0		0	0	0
0	0		1	0	0		0	0	0
0	1		0	3	0		0	1	0
1	3		0	0	1		0	0	0
1	0		0	0	0		0	1	1
1	0		3	1	1		0	0	0
1	0		0	0	0		0	0	0
1	0		0	0	0		0	0	1
1	2		0	2	0		0	0	0
1	1		1	2	0		0	0	1
2	3		0	0	0		0	0	0
2	1		0	0	1		0	0	0
1	1		0	0	1		0	0	0
1	0		0	0	0		0	0	0
0	0		0	0	0		0	0	0
1	0		0	0	0		0	0	0
1	1		0	0	0		0	2	0
1	0		0	0	0		0	0	0
2	0		0	1	0		0	0	0
1	2		0	0	0		0	0	0
1	0		0	0	0		0	0	2
1	0		0	0	2		0	1	0
1	3		0	1	0		0	2	0
1	0		0	0	0		0	1	0
1	1		1	0	0		0	1	0
1	0		0	0	0		0	1	0
1	0		0	0	1		0	0	0
2	1		2	0	1		0	0	1
1	2		0	0	0		0	0	0
2	0		0	0	0		0	0	1
1	2		2	0	1		0	0	0
1	1		0	0	0		0	0	0
2	0		0	0	0		0	0	0
1	1		0	1	0		0	0	0
0	0		0	0	0		0	0	1
2	0		0	0	0		0	0	0
2	2		0	0	1		0	0	0
1	0		0	0	0		0	0	1
3	2		0	0	0		0	0	0
0	1		0	0	0		0	0	1
1	1		0	1	0		0	0	0
1	1		3	1	0		0	0	1
2	0		0	3	0		0	0	1
1	1		1	0	0		0	0	1
1	2		0	0	0		0	0	1
1	2		0	0	0		0	0	1
1	1		0	1	0		0	0	2
0	1		0	1	0		0	0	0
1	2		0	0	1		0	0	0
2	2		0	0	0		0	0	0
1	3		0	0	0		0	0	0
2	1		0	0	0		0	0	1
2	1		1	0	0		0	0	2
2	0		0	0	0		0	0	0
1	0		1	2	1		0	0	0
3	1		1	0	0		0	0	1
1	2		0	1	2		0	0	0
2	1		0	0	0		0	0	0
1	2		2	0	0		0	0	1
2	2		0	0	0		0	0	1
1	1		0	0	0		0	0	0
0	2		1	0	0		0	0	1
0	2		0	2	0		0	0	0
0	1		0	0	0		0	0	1
1	1		0	0	0		0	0	1
2	2		0	1	0		0	0	0
2	1		0	0	1		0	0	0
0	3		0	0	0		0	0	1
1	1		0	0	1		0	0	0
1	2		1	2	0		0	0	0
1	0		0	7	0		0	0	0
2	0		0	1	0		0	0	0
1	1		1	0	0		0	0	0
1	1		0	0	0		0	0	0
0	2		0	0	0		0	0	0
1	2		0	1	0		0	0	0
1	2		1	1	0		0	0	0
1	2		0	0	0		0	0	0
1	2		1	0	1		0	3	0
0	1		0	0	0		0	4	0
1	1		0	0	0		0	2	0
0	1		0	0	0		0	1	0
0	1		0	0	2		0	0	0
1	0		0	0	1		0	0	0
1	0		0	0	0		0	0	0
0	0		0	0	0		0	0	0
2	1		0	0	0		0	0	0
1	1		0	0	1		0	0	0
0	4		0	0	1		0	0	4
1	1		0	0	0		0	1	0
1	1		0	0	0		0	2	0
1	1		0	0	0		0	0	0
1	2		0	0	0		0	0	1
1	1		0	0	0		0	2	0
1	2		2	1	0		0	0	0
1	1		0	0	0		0	1	2
1	2		0	0	0		0	2	0
0	0		0	0	0		0	0	1
0	2		0	1	0		0	0	0
0	0		0	0	0		0	0	0
0	3		0	1	0		0	0	0
2	1		0	0	0		0	1	1
3	0		0	0	0		0	0	0
1	0		0	0	0		0	0	1
0	2		0	0	0		0	0	0
0	0		0	1	0		0	0	1
0	1		0	0	0		0	0	0
0	1		0	0	0		0	0	0
1	2		4	0	0		0	0	0
1	1		0		0		0	0	0
2	1		0		1		0	0	0
1	0		0		0		0	0	0
1	0		0		0		0	0	0
1	1		0		0		0	0	0
1	2		0		0		0	0	0
1	2		1		0		0	0	0
1	0		2		1		0	3	0
2	3		0		0		0	4	0
1	1		0		2		0	2	0
2	0		0		0		0	1	0
1	0		0		0		0	0	0
1	3		0		0		0	0	0
3	0		0		0		0	0	0
0	1				0		0	0	0
1	0				0		0	0	0
2	1				0		0	0	0
1	2						0	0	4
2	2						0	1	0
1	1						0	2	0
1	2						0	0	0
1	1						0	0	1
1	0						0
2	1						0
2	2						0
1	1						0
1	2						0
1	1						0
1	2						0
0	1						0
0	2						0
2	0						0
1	2						0
0	1						0
0	1						0
0	2
0	0
1	3
1	0
0	1
0	1
0	1
	2
	4
	1
	1
	3
	2
	1
