# Supplementary material for: Essential roles of Caspase-3 in facilitating Myc-induced genetic instability and carcinogenesis
Source: eLife journal article supplement (doi:10.7554/elife.26371), 2017-07-10
Supplement: supp [file elife_poa_e26371_Fig.3_source_data_3.xlsx]

## Sheet: Sheet1
Replicate	Number of Colones per Replicate
	Vector Control	MCF10A Myc	EndoG	EndoG+Myc
1	10	125	12	1
1	12	115	1	6
1	6	132	5	2
2	6	102	6	5
2	10	93	12	15
2	4	76	14	13
3	12	101	5	4
3	10	85	3	4
3	19	112	4	5
4	6	101
4	10	119
4	4	74
5	10
5	4
5	6
6	25
6	31
	10.8824	102.917	6.88889	6.11111
	7.55714	18.6082	4.59468	4.75511
	1.83287	5.37172	1.87577	1.94127
