# Supplementary material for: Essential roles of Caspase-3 in facilitating Myc-induced genetic instability and carcinogenesis
Source: eLife journal article supplement (doi:10.7554/elife.26371), 2017-07-10
Supplement: supp [file elife_poa_e26371_Fig.3_source_data_4.xlsx]

## Sheet: Sheet1
MCF10a				Myc				EndoG				EndoG+Myc
0	1	1		0	0	0		0	0	0		3	0	0
0	0	0		2	0	1		0	0	0		3	0	0
1	1	0		0	0	0		0	0	0		2	0	0
0	0	2		0	0	0		0	1	0		2	0	1
0	0	1		2	1	1		0	0	0		2	0	0
0	0	1		3	3	0		1	0	0		2	0	0
0	0	0		4	0	1		0	0	0		2	1	0
0	0	0		1	1	1		1	0	0		2	0	0
0	1	0		0	1	0		0	0	3		2	1	0
0	0	0		0	0	1		0	1	0		2	0	0
0	1	0		0	0	0		0	2	1		2	0	0
0	1	0		2	2	0		0	0	0		2	0	0
1	1	1		1	1	2		0	1	0		2	0	0
0	0	0		0	3	1		0	0	0		2	0	0
0	0	0		1	1	2		0	0	0		2	0	1
0	1	0		1	1	1		0	0	0		2	0	0
0	0	0		0	0	1		2	0	0		2	0	0
1	0	1		1	3	0		0	0	0		2	0	0
0	0	1		2	2	1		0	0	1		2	0	0
0	0	0		0	1	0		0	0	0		2	0	0
0	0	0		2	1	0		0	0	1		2	0	0
1	0	1		0	1	0		0	0	0		2	0	1
0	1	0		2	0	1		0	0	0		1	0	0
0	0	0		3	1	0		0	0	3		1	0	0
0	0	0		2	1	0		0	0	1		1	3	0
0	0	0		0	2	1		1	4	0		1	0	0
0	0	1		0	2	3		0	0	0		1	0	2
0	0	0		0	2	0		0	0	2		1	0	0
1	0	1		0	0	1		0	0	0		1	2	0
0	0	0		0	1	0		2	1	1		1	0	0
0	0	0		1	2	1		1	0	0		1	0	0
1	0	1		1	1	1		0	0	0		1	0	1
0	0	0		0	1	0		0	0	0		1	0	0
0	0	0		1	0	3		0	0	0		1	0	0
0	1	0		2	0	0		0	0	0		1	0	0
0	1	0		3	2	1		0	0	1		1	1	1
0	0	0		0	1	1		0	0	0		1	0	0
0	0	0		0	1	0		0	0	1		1	0	1
0	0	0		2	0	0		1	0	0		1	0	0
0	0	0		0	2	1		0	0	0		1	0	1
1	2	0		1	1	1		0	0	0		1	0	0
0	0	0		4	2	0		0	0	0		1	0	0
0	0	1		2	1	2		0	1	1		1	0	0
0	0	0		0	1	0		0	0	0		1	0	0
0	0	0		0	0	1		2	0	0		1	0	0
0	0	0		0	2	1		0	0	0		1	0	0
1	0	1		0	2	0		0	0	0		1	0	0
0	0	0		0	1	0		0	2	0		1	0	0
0	0	0		0	1	1		0	0	1		1	0	0
0	0	0		2	0	1		1	0	0		1	0	0
0	0	0		0	2	0		3	0	0		1	3	0
0	0	0		0	1	0		0	2	1		1	4	0
1	0	1		2	2	0		0	0	0		1	2	0
0	0	0		3	1	1		0	0	0		1	1	0
1	0	0		3	1	1		1	0	0		1	0	0
1	0	0		0	1	1		0	0	0		1	0	0
0	0	0		0	2	0		2	0	0		1	0	0
0	0	1		1	2	1		0	0	0		1	0	0
0	0	0		0	1	1		1	0	0		1	0	0
0	0	0		1	2	0		0	1	0		1	0	0
0	1	0		0	1	1		0	0	0		1	0	4
1	0	0		1	2	1		0	0	0		1	1	0
1	0	0		0	1	0		0	1	0		1	2	0
1	0	0		2	1	0		0	0	1		1	0	0
0	0	0		0	1	1		1	0	0		1	0	1
0	1	0		0	1	2		1	0	4		1	2	0
0	0	0		0	0	1		0	0	0		1	0	0
0	0	1		2	3	2		0	0	0		1	1	2
0	0	0		2	1	0		0	0	0		1	2	0
0	0	0		0	1	0		0	0	0		1	0	0
0	1	0		0	1	1		1	0	1		1	4	4
0	0	0		0	1	0		0	0	0		1	0	0
0	1	0		1	1	0		0	0	0		1	0	0
0	0	0		3	1	2		0	0	0		1	0	0
0	0	0		0	1	1		0	0	1		1	0	0
0	1	0		3	0	1		0	0	1		1	1	0
0	0	0		1	0	0		0	0	1		1	0	0
0	0	0		2	0	0		0	0	0		1	0	0
0	0	1		2	1	1		0	0	0		1	0	0
0	0	0		2	1	0		2	1	0		1	0	0
0	1	0		1	0	1		0	1	1		1	0	0
1	0	0		2	0	1		0	0	0		1	0	0
0	0	0		0	1	1		0	1	0		1	0	2
0	0	0		0	0	1		2	0	0		1	0	0
0	1	0		0	1	3		0	0	0		1	0	0
0	0	0		0	1	0		0	0	0		1	0	0
0	0	1		1	1	0		0	1	0		1	1	0
1	0	0		0	2	1		0	0	0		1	1	0
0	0	0		2	1	0		0	0	0		1	0	0
0	0	0		1	2	2		1	2	0		1	0	0
0	0	0		1	1	2		0	1	1		1	2	0
0	1	0		1	1	1		0	0	0		1	0	0
0	0	0		0	0	1		0	1	0		1	0	0
0	0	0		2	2	2		0	0	0		1	0	0
1	1	3		3	1	1		0	0	0		1	0	0
0	0	1		0	1	1		0	2	0		1	0	0
0	0	0		1	3	0		0	1	0		1	0	1
0	0	0		1	1	2		1	0	0		1	0	0
0	0	0		1	2	0		0	1	0		1	2	1
0	0	0		1	2	2		0	0	0		1	0	0
0	0	0		1	1	1		0	0	0		1	0	0
0	0	0		1	1	0		1	0	0		1	2	3
1	0	0		1	1	1		2	0	2		1	0	0
1	1	2		2	1	0		0	0	1		1	0	0
0	0	0		1	1	1		1	0	1		1	0	1
0	0	0		0	2	2		4	0	1		1	0	0
0	0	0		1	1	0		0	0	2		1	1	0
0	0	0		1	2	0		0	0	0		1	0	4
0	0	0		2	0	0		0	0	0		1	0	2
0	0	1		2	3	2		0	0	0		1	3	4
0	0	1		1	0	0		0	1	0		1	2	2
0	0	0		3	2	0		0	0	0		1	2	0
0	0	0		1	4	0		0	1	0		1	0	0
0	0	1		0	1	0		0	0	0		1	0	0
0	0	0		2	1	1		0	0	3		1	2	0
0	0	0		3	1	0		1	0	0		1	0	0
0	0	0		1	2	1		1	0	0		1	0	0
0	0	0		1	1	0		0	0	0		1	1	0
0	0	0		1	1	1		0	1	1		1	1	0
0	0	0		1	0	0		0	1	1		1	0	0
1	0	1		2	1	0		0	0	0		1	0	0
1	0	2		1	1	1		0	0	0		1	0	0
0	0	2		2	0	1		2	1	0		1	0	5
0	0	0		1	1	0		0	1	0		1	0	0
0	0	0		2	1	1		0	0	0		1	0	0
0	0	0		2	0	1		2	0	0		1	0	0
0	0	0		1	0	0		0	0	0		1	0	2
0	0	0		1	1	0		0	0	1		1	0	0
0	0	1		1	0	0		0	0	0		1	3	0
0	0	0		1	0	1		0	0	0		1	0	0
0	0	0		1	1	3		0	0	0		1	0	0
0	0	0		2	1	0		0	1	0		1	3	0
1	0	1		1	1	0		0	0	0		1	2	0
0	0	0		1	1	1		0	0	0		1	0	1
0	0	0		0	1	0		0	0	2		1	0	1
0	0	0		0	1	1		0	0	0		1	0	0
0	0	0		2	1	1		0	0	0		1	0	0
0	0	2		0	0	0		0	1	1		1	0	0
0	0	1		2	1	0		0	0	0		1	0	0
0	0	0		1	1	3		0	0	0		1	0	0
0	0	0		3	1	0		1	0	0		1	0	0
0	0	0		2	1	0		0	0	0		1	0	2
0	0	0		0	0	1		0	1	2		1	0	2
0	0	2		2	2	0		0	0	3		1	0	1
0	1	1		1	1	1		0	0	0		1	3	0
0	0	0		1	0	2		1	1	0		1	1	0
0	0	0		2	1	1		0	1	1		1	0	0
0	0	0		1	2	1		2	0	0		1	0	0
2	0	0		2	2	0		2	0	1		1	0	0
1	0	1		2	0	0		1	0	2		1	0	0
2	0	1		1	1	0		0	0	1		1	0	1
0	0	1		2	2	2		1	0	0		1	0	0
1	0	0		3	1	1		0	0	0		1	1	0
1	0	0		2	1	0		0	0	0		1	0	0
0	0	0		1	1	1		0	1	1		1	0	0
2	0	0		2	1	0		0	0	1		1	0	1
1	0	0		1	1	1		0	0	0		0	2	0
1	1	0		1	1	1		0	2	0		0	0	0
0	0	0		1	2	0		0	0	0		0	0	0
1	2	0		2	0	0		0	0	0		0	1	0
1	0	1		1	2	0		1	0	0		0	2	0
1	0	4		1	1	2		0	0	0		0	0	0
1	0	0		2	0	0		1	1	2		0	0	5
1	0	0		3	0	0		1	0	0		0	0	7
2	0	0		3	0	2		1	2	0		0	2	0
2	1	0		1	0	0		0	0	0		0	0	0
0	1	1		1	2	1		0	0	2		0	0	0
0	0	0		1	0	0		0	0	1		0	1	0
1	0	0		1	0	0		0	1	0		0	0	0
1	2	0		2	3	0		1	0	0		0	0	0
2	0	0		1	1	2		1	0	0		0	0	0
0	2	0		1	2	2		1	0	0		0	0	0
1	0	0		1	1	0		0	0	0		0	0	0
0	0	0		1	1	1		0	0	0		0	0	0
1	0	1		0	1	1		0	0	0		0	0	0
2	0	0		2	2	0		0	3	0		0	0	0
1	0	0		0	2	0		0	0	0		0	3	0
0	1	0		2	2	3		1	0	0		0	4	0
0	0	0		2	0	0		1	1	0		0	0	0
0	0	1		1	3	0		0	4	1		0	0	0
0	0	1		1	1	1		0	4	0		0	0	0
0	0	0		4	1	3		1	2	1		0	0	0
0	0	0		2	1	0		0	2	0		0	0	0
1	1	0		1	1	0		0	0	1		0	0	0
1	1	0		1	1	2		0	0	0		0	0	2
1	2	0		2	0	1		0	0	0		0	12	1
1	0	0		2	1	2		0	0	1		0	0	0
1	1	0		1	0	1		1	4	2		0	0	0
1	1	0		1	1	2		1	0	0		0	1	0
1	2	0		2	1	0		0	1	0		0	0	0
0	2	0		2	1	0		0	0	0		0	0	0
0	1	0		1	1	3		0	0	0		0	0	2
1	0	0		1	2	0		1	0	0		0	1	1
1	0	1		1	2	0		1	0	0		0	0	0
2	0	1		2	1	2		1	0	0		0	0	0
1	1	0		1	1	0		1	0	0		0	0	0
1	0	0		1	3	1		2	1	1		0	1	0
0	0	0		0	1	2		0	0	1		0	2	0
0	0	0		0	1	0		1	2	0		0	0	1
0	0	0		2	0	2		0	3	2		0	0	0
1	0	0		2	1	1		0	1	0		0	2	0
1	0	0		1	0	1		0	0	0		0	0	0
2	1	0		1	1	0		0	0	0		0	0	0
0	2	0		1	1	0		0	0	0		0	1	0
1	1	1		1	1	1		0	0	2		0	3	0
1	1	0		1	2	0		0	0	0		0	3	0
1	0	1		1	1	3		0	0	0		0	0	0
1	2	1		1	1	2		0	0	0		0	0	0
1	1	1		1	1	0		0	0	0		0	1	1
1	0	0		2	1	0		0	0	0		0	0	1
0	0	1		2	1	0		0	2	1		0	0	0
1	1	1		4	1	2		0	0	1		0	1	0
0	0	0		3	1	0		0	0	0		0	0	1
2	1	0		2	2	0		0	0	0		0	0	0
0	1	0		1	1	0		0	0	0		0	0	0
1	0	0		2	2	1		0	0	0		0	0	0
0	0	0		0	2	0		0	1	0		0	2	0
0	0	0		1	0	2		0	0	0		0	0	0
2	0	2		1	1	0		0	0	0		0	2	0
1	1	0		1	1	2		0	0	1		0	0	0
0	0	0		0	0	2		0	4	0		0	0	0
0	0	0		1	2	0		1	0	1		0	0	0
0	0	1		1	2	0		0	0	0		0	0	0
0	1	0		4	1	2		0	1	4		0	1	0
1	0	1		2	1	1		0	0	0		0	1	0
1	0	0		2	1	0		0	0	0		0	0	1
1	1	0		0	2	0		3	0	0		0	0	0
1	0	0		1	2	0		0	0	0		0	0	1
2	0	0		1	1	1		0	1	0		0	0	0
2	0	0		0	0	0		0	0	0		0	3	0
0	1	0		0	1	0		0	0	0		0	0	0
0	1	1		0	0	0		0	0	0		0	3	2
1	1	1		0	1	1		1	0	0		0	3	0
0	0	0		0	1	0		0	0	0		0	0	0
0	1	2		0	2	2		0	0	0		0	0	0
0	0	2		0	1	1		0	0	0		0	0	0
1	0	0		2	2	0		1	0	0		0	0	0
2	0	0		1	2	1		0	1	1		0	0	0
1	0	0		0	2	0		0	4	1		0	0	0
0	2	0		4	1	2		2	0	0		0	4	0
0	2	0		1	0	1		1	0	0		0	0	0
0	0	0		1	0	1		2	0	2		0	0	0
0	0	1		1	0	3		0	0	0		0	0	1
0	0	0		1	2	2		1	1	0		0	2	1
1	1	0		0	2	0		0	0	0		0	0	0
0	1	0		1	2	1		0	0	1		0	0	0
0	0	0		0	1	1		0	0	0		0	0	0
2	0	2		0	1	0		1	0	0		0	0	0
1	0	0		2	1	0		0	0	0		0	0	0
2	0	0		3	2	2		0	0	0		0	0	0
2	0	0		1	2	0		0	2	3		0	0	0
1	0	0		2	2	1		0	0	0		0	0	0
0	0	0		1	0	0		0	2	0		0	0	0
0	0	0		4	0	2		0	2	0		0	0	1
0	1	1		5	1	1		1	0	1		0	1	2
0	0	0		1	2	1		0	0	2		0	0	0
0	0	0		0	1	0		0	0	0		0	0	0
0	0	0		1	4	0		0	0	0		0	0	1
2	0	0		1	0	3		0	0	0		0	0	1
0	1	0		2	1	1		0	0	0		0	0	0
0	1	0		1	1	1		1	0	2		0	0	0
2	0	2		2	1	0		4	1	0		0	0	0
1	0	0		1	1	2		0	1	0		0	0	0
1	0	1		0	1	0		0	0	0		0	0	0
1	0	0		1	2	2		0	0	0		0	1	0
0	1	2		2	1	1		0	0	0		0	0	1
0	0	1		3	0	3		0	0	0		0	0	0
0	0	0		1	0	0		0	0	0		0	0	0
0	1	0		1	2	0		0	0	1		0	0	2
1	0	0		1	3	0		0	0	0		0	0	0
1	0	0		2	1	1		0	1	0		0	0	0
0	0	0		0	0	1		0	0	0		0	2	0
2	0	1		1	1	0		3	0	0		0	0	1
1	0	2		1	1	1		0	0	1		0	0	0
1	1	0		0	2	0		0	0	1		0	0	0
2	1	0		1	0	1		0	1	1		0	0	0
1	0	0		1	1	3		0	0	1		0	0	0
1	0	0		1	1	0		0	2	0		0	0	0
0	0	0		1	1	2		0	0	0		0	0	0
0	0	0		1	2	1		1	0	0		0	0	0
0	0	0		2	2	1		0	0	0		0	0	0
0	0	1		0	1	2		0	0	0		0	0	2
0	0	1		1	1	1		0	0	0		0	0	0
0	0	0		2	2	2		0	3	0		0	1	0
0	0	5		1	1	0		0	1	1		0	0	0
0	0	3		1	2	0		1	0	0		0	0	1
0	0	2		2	1	2		0	0	0		0	0	0
0	0	0		2	1	0		0	0	0		0	0	1
0	0	0		1	1	3		0	2	0		0	0	0
0	0	0		3	1	2		0	0	0		0	0	0
0	0	0		1	3	1		0	0	1		0	0	0
0	0	0		1	2	2		0	0	4		0	0	0
0	1	1		1	1	1		0	3	0		0	3	0
0	0	1		1	1	2		0	0	1		0	0	0
0	0	0		1	0	2		0	0	0		0	0	1
0	1	0		1	1	0		1	0	0		0	0	0
0	0	1		3	0	2		0	0	0		0	0	0
0	1	0		1	1	2		0	0	0		0	1	0
0	0	1		3	2	1		0	0	0		0	0	0
0	0	0		0	2	1		0	0	0		0	0	0
0	0	1		1	3	2		0	1	0		0	0	1
0	1	1		2	1	2		0	1	1		0	0	0
0	0	1		2	2	2		0	0	0		0	1	1
0	0	3		2	0	4		1	0	0		0	0	0
0	0	0		1	0	2		1	1	0		0	0	1
0	0	0		1	2	2		2	0	0		0	0	1
1	0	0		1	2	1		0	2	0		0	0	1
2	0	0		1	2	0		0	0	0		0	1	0
1	0	0		1	1	0		0	0	0		0	0	1
0	0	0		2	0	0		0	2	2		0	0	0
2	0	0		1	1	0		0	0	1		0	1	0
2	0	0		1	1	2		0	0	0		0	1	0
1	0	0		0	1	1		0	0	0		0	0	0
0	0	0		1	2	0		0	0	4		0	0	0
2	1	2		1	1	2		0	0	0		0	0	0
1	0	2		1	1	2		0	1	0		0	0	1
1	1	1		2	1	1		0	0	2		0	0	0
2	1	2		0	0	1		1	4	0		0	0	0
1	1	0		1	0	1		0	0	1		0	0	0
0	0	0		2	2	2		1	0	0		0	0	0
1	0	0		0	1	0		1	0	1		0	1	0
0	0	0		0	1	1		0	4	0		0	0	0
1	0	0		1	2	0		0	0	0		0	0	0
1	1	0		1	1	2		0	0	0		0	0	0
0	0	0		1	1	3		0	0	4		0	0	0
1	0	0		2	1	1		0	0	0		0	0	1
1	2	1		1	1	0		3	0	0		0	0	0
0	0	0		1	1	1		0	0	0		0	0	0
0	0	1		2	0	2		0	0	0		0	1	0
0	0	2		0	3	0		1	4	0		0	0	0
0	0	1		2	1	0		0	0	0		0	0	0
0	0	1		0	1	3		0	1	0		0	1	1
0	0	0		2	1	2		0	1	0		0	0	0
0	0	0		1	2	4		2	0	1		0	0	0
0	0	0		1	2	0		0	0	0		0	0	0
1	1	0		2	0	1		4	0	0		0	0	0
0	0	0		1	1	0		1	0	0		0	0	0
0	0	1		3	2	2		0	0	0		0	0	0
2	0	0		1	0	0		0	0	0		0	0	0
0	1	0		2	1	0		0	1	0		0	1	0
0	0	1		1	3	0		2	0	1		0	1	0
0	0	0		1	2	1		0	0	1		0	0	1
2	2	0		1	2	0		0	0	0		0	0	0
0	0	0		1	1	0		0	0	0		0	0	0
0	1	1		1	2	1		2	0	0		0	0	0
0	0	0		1	0	0		0	0	1		0	1	0
0	0	1		3	0	4		0	0	0		0	1	0
2	3	0		1	0	0		0	1	0		0	1	0
1	0	2		1	2	1		0	0	0		0	1	1
1	2	0		2	2	0		0	0	1		0	0	0
0	0	0		2	2	2		0	0	1		0	0	1
1	0	0		2	1	1		2	0	0		0	0	0
2	2	0		1	0	1		0	0	0		0	1	0
2	1	1		1	0	0		0	0	0		0	0	0
1	0	1		1	1	2		0	4	3		0	0	0
0	0	1		1	2	3		0	0	0		0	0	0
0	0	2		1	1	3		0	0	0		0	0	0
3	0	1		1	0	0		1	0	0		0	0	0
2	0	1		2	0	1		0	3	0		0	1	0
0	0	0		1	1	3		0	0	1		0	0	0
0	0	2		1	1	0		0	0	0		0	1	1
0	1	1		1	1	0		3	1	1		0	0	0
0	1	0		1	1	0		0	0	0		0	0	0
2	2	1		1	1	0		0	0	0		0	0	1
1	1	1		1	1	2		0	2	0		0	0	0
1	2	1		0	1	1		1	2	0		0	0	1
0	0	1		0	2	3		0	0	0		0	0	0
0	1	1		1	2	1		0	0	1		0	0	0
0	0	1		1	1	1		0	0	1		0	0	0
0	0	1		1	1	0		0	0	0		0	0	0
0	1	1		3	0	0		0	0	0		0	0	0
3	1	1		1	1	0		0	0	0		0	0	0
0	0	0		1	1	1		0	0	0		0	2	0
0	0	0		2	1	0		0	0	0		0	0	0
0	0	0		0	2	0		0	1	0		0	0	0
1	0	1		2	1	2		0	0	0		0	0	0
0	1	0		1	1	0		0	0	0		0	0	2
0	1	0		1	1	0		0	0	2		0	1	0
1	0	0		0	1	3		0	1	0		0	2	0
0	0	0		4	1	0		0	0	0		0	1	0
2	0	0		1	1	1		1	0	0		0	1	0
0	1	0		0	1	0		0	0	0		0	1	0
0	0	0		0	1	0		0	0	1		0	0	0
2	1	0		1	2	1		2	0	1		0	0	1
1	0	0		0	1	2		0	0	0		0	0	0
1	0	0		0	2	0		0	0	0		0	0	1
0	1	0		0	1	2		2	0	1		0	0	0
0	0	0		1	1	1		0	0	0		0	0	0
1	0	0		0	2	0		0	0	0		0	0	0
3	1	0		1	1	1		0	1	0		0	0	0
0	1	0		4	0	0		0	0	0		0	0	1
0	1	0		0	2	0		0	0	0		0	0	0
1	0	1		0	2	2		0	0	1		0	0	0
0	0	1		0	1	0		0	0	0		0	0	1
1	1	1		2	3	2		0	0	0		0	0	0
0	0	1		0	0	1		0	0	0		0	0	1
1	0	1		0	1	1		0	1	0		0	0	0
1	0	1		0	1	1		3	1	0		0	0	1
0	0	0		2	2	0		0	3	0		0	0	1
0	0	0		1	1	1		1	0	0		0	0	1
0	1	1		3	1	2		0	0	0		0	0	1
2	0	0		4	1	2		0	0	0		0	0	1
0	0	1		2	1	1		0	1	0		0	0	2
0	0	1		4	0	1		0	1	0		0	0	0
0	0	0		1	1	2		0	0	1		0	0	0
0	0	0		2	2	2		0	0	0		0	0	0
0	2	1		1	1	3		0	0	0		0	0	0
0	0	1		1	2	1		0	0	0		0	0	1
0	0	1		2	2	1		1	0	0		0	0	2
0	1	1		1	2	0		0	0	0		0	0	0
0	0	1		2	1	0		1	2	1		0	0	0
0	0	0		2	3	1		1	0	0		0	0	1
1	0	0		3	1	2		0	1	2		0	0	0
0	0	0		0	2	1		0	0	0		0	0	0
0	0	0		1	1	2		2	0	0		0	0	1
2	1	0		2	2	2		0	0	0		0	0	1
0	0	1		2	1	1		0	0	0		0	0	0
1	0	0		0	0	2		1	0	0		0	0	1
1	0	0		2	0	2		0	2	0		0	0	0
1	1	1		0	0	1		0	0	0		0	0	1
0	1	1		1	1	1		0	0	0		0	0	1
0	0	0		0	2	2		0	1	0		0	0	0
1	0	0		0	2	1		0	0	1		0	0	0
0	0	1		0	0	3		0	0	0		0	0	1
0	1	0		0	1	1		0	0	1		0	0	0
0	1	0		0	1	2		1	2	0		0	0	0
0	0	0		1	1	0		0	7	0		0	0	0
1	0	0		0	2	0		0	1	0		0	0	0
0	0	1		0	1	1		1	0	0		0	0	0
0	1	0		0	1	1		0	0	0		0	0	0
0	1	0		1	0	2		0	0	0		0	0	0
1	0	0		1	1	2		0	1	0		0	0	0
0	0	0		0	1	2		1	1	0		0	0	0
0	1	1		0	1	2		0	0	0		0	0	0
0	0	1		4	1	2		1	0	1		0	3	0
0	0	0		2	0	1		0	0	0		0	4	0
0	1	0		2	1	1		0	0	0		0	2	0
0	0	3		2	0	1		0	0	0		0	1	0
1	0	0		1	0	1		0	0	2		0	0	0
2	0	0		3	1	0		0	0	1		0	0	0
0	1	0		0	1	0		0	0	0		0	0	0
1	0	0		0	0	0		0	0	0		0	0	0
0	0	0		1	2	1		0	0	0		0	0	0
0	2	0		1	1	1		0	0	1		0	0	0
0	0	2		1	0	4		0	0	1		0	0	4
0	2	1		1	1	1		0	0	0		0	1	0
0	0	0		2	1	1		0	0	0		0	2	0
0	1	0		2	1	1		0	0	0		0	0	0
0	1	0		0	1	2		0	0	0		0	0	1
2	1	0		0	1	1		0	0	0		0	2	0
1	2	0		1	1	2		2	1	0		0	0	0
0	1	0		1	1	1		0	0	0		0	1	2
0	0	0		1	1	2		0	0	0		0	2	0
2	0	0		0	0	0		0	0	0		0	0	1
0	0	0		0	0	2		0	1	0		0	0	0
0	0	0		0	0	0		0	0	0		0	0	0
1	0	1		2	0	3		0	1	0		0	0	0
2	0	1		1	2	1		0	0	0		0	1	1
0	0	0		2	3	0		0	0	0		0	0	0
0	0	0		0	1	0		0	0	0		0	0	1
0	2	1		1	0	2		0	0	0		0	0	0
0	1	0		1	0	0		0	1	0		0	0	1
1	0	1		1	0	1		0	0	0		0	0	0
0	1	0		1	0	1		0	0	0		0	0	0
1	0	0		1	1	2		4	0	0		0	0	0
1	0	0		0	1	1		0		0		0	0	0
0	4	0		2	2	1		0		1		0	0	0
0	0	0		1	1	0		0		0		0	0	0
0	2	0		2	1	0		0		0		0	0	0
0	0	0		0	1	1		0		0		0	0	0
0	1	0		1	1	2		0		0		0	0	0
1	0	0		1	1	2		1		0		0	0	0
1	0	1		1	1	0		2		1		0	3	0
1	0	0		2	2	3		0		0		0	4	0
0	0	2		0	1	1		0		2		0	2	0
0	0	0		4	2	0		0		0		0	1	0
0	0	0		0	1	0		0		0		0	0	0
0	0	0		4	1	3		0		0		0	0	0
0	0	0		3	3	0		0		0		0	0	0
0	0	0		1	0	1				0		0	0	0
0	2	1		1	1	0				0		0	0	0
0	2	1		0	2	1				0		0	0	0
0	2	0		1	1	2						0	0	4
0	3	0		1	2	2						0	1	0
0	0	2		1	1	1						0	2	0
0	0	0		0	1	2						0	0	0
0	1	2		2	1	1						0	0	1
0	1	0		1	1	0						0
0	0	0		1	2	1						0
0	0	0		2	2	2						0
0	0	0		1	1	1						0
1	0	0		1	1	2						0
0	0	1		1	1	1						0
0	2	0		2	1	2						0
0	1	0		1	0	1						0
0	2	0		1	0	2						0
0	1	0		0	2	0						0
1	0	0		0	1	2						0
2	0	1		0	0	1						0
0	2	1		2	0	1						0
		2		1	0	2
		0		1	0	0
		1		4	1	3
		1		4	1	0
		2		2	0	1
		2		0	0	1
		1		0	0	1
		0		0		2
		0		0		4
		0		0		1
		1		0		1
		0		1		3
				1		2
				1		1
				1
				0
				1
				3
				2
				2
				0
				2
				2
				1
				2
				2
				2
				2
				2
				0
				4
				1
				1
				1
				0
				2
				3
				0
				1
				0
				1
				1
				0
				0
				1
				1
				2
				2
				0
				0
				1
				0
				1
				2
				1
				0
				1
				3
				0
				1
				2
				1
				2
				3
				2
				3
				1
				1
				0
				2
				2
				1
				0
				2
				0
				1
				1
				1
				0
				0
				0
				0
				0
				3
				4
				2
