# Supplementary material for: Essential roles of Caspase-3 in facilitating Myc-induced genetic instability and carcinogenesis
Source: eLife journal article supplement (doi:10.7554/elife.26371), 2017-07-10
Supplement: supp [file elife_poa_e26371_Fig.3_source_data_5.xlsx]

## Sheet: Sheet1
Q-PCR Results for cytoplasmic mtND5 gene
	Sample Name	Target Name	CT (cycle # to reach exponential phase)
	10A	mtND5	30.321		26.8853		3.43567		10.8203	21.6407	18.5596	3.1221		1.16598	0.999976	0.168216				Means	SD
	10A	mtND5	29.83		26.8853		2.94467		7.69902	15.398				0.829635					MCF10A	0.999976	0.168216
	10A	mtND5	30.1057		26.8853		3.22033		9.31998	18.64				1.00431					MCF10A-Myc	1.91765	0.517917
	10A Myc	mtND5	29.404		25.6936		3.71041		13.0902	26.1804	35.5916	9.61253		1.41058	1.91765	0.517917			Casp3KO	0.178442	0.0256462
	10A Myc	mtND5	30.198		25.6936		4.50441		22.6968	45.3935				2.44577					Casp3KO-Myc	0.18899	0.125525
	10A Myc	mtND5	29.8311		25.6936		4.13754		17.6004	35.2008				1.8966
	C3KO	mtND5	28.693		28.187		0.505974		1.42008	2.84016	3.31188	0.475994		0.153026	0.178442	0.0256462
	C3KO	mtND5	29.11		28.187		0.922974		1.89602	3.79204				0.204312
	C3KO	mtND5	28.911		28.187		0.723973		1.65172	3.30345				0.177988
	C3KO Myc	mtND5	28.741		27.1719		1.5691		2.9672	5.9344	3.50765	2.32974		0.319741	0.18899	0.125525
	C3KO Myc	mtND5	26.538		27.1719		-0.633897		0.644433	1.28887				0.0694432
	C3KO Myc	mtND5	27.8942		27.1719		0.722323		1.64984	3.29967				0.177784
	10A	18S	26.883		26.8853
	10A	18S	26.93
	10A	18S	26.843
	10A Myc	18S	25.687		25.6936
	10A Myc	18S	25.767
	10A Myc	18S	25.6268
	C3KO	18S	28.117		28.187
	C3KO	18S	28.1731
	C3KO	18S	28.271
	C3KO Myc	18S	27.261		27.1719
	C3KO Myc	18S	27.083
	C3KO Myc	18S	27.1717
