# Supplementary material for: Essential roles of Caspase-3 in facilitating Myc-induced genetic instability and carcinogenesis
Source: eLife journal article supplement (doi:10.7554/elife.26371), 2017-07-10
Supplement: supp [file elife_poa_e26371_Fig.4_source_data_1.xlsx]

## Sheet: Sheet1
MCF10a				Myc				Casp3+nEndoG				Casp3+nEndoG+Myc				Cell Line	MCF10a				Myc				Casp3+nEndoG				Casp3+nEndoG+Myc
0	1	1		0	0	0		0	0	0		0	0	1			0.434	0.346	0.386719		1.17577	1.08876	0.951362		1.13333	1.07143	1.12791		1.202	1.48802	0.92986
0	0	0		2	0	1		2	2	4		0	0	1		Average	0.388906				1.07196				1.11089				1.20663
1	1	0		0	0	0		0	0	2		2	0	1		Stand Dev	0.0440408				0.113142				0.0342818				0.279111
0	0	2		0	0	0		0	0	0		2	2	1		SEM	0.0254269	0	0		0.0653225	0	0		0.0197926	0	0		0.161145	0	0
0	0	1		2	1	1		1	3	3		2	3	1
0	0	1		3	3	0		1	0	0		0	4	0
0	0	0		4	0	1		0	0	1		0	0	1
0	0	0		1	1	1		0	6	0		1	2	0
0	1	0		0	1	0		13	0	1		0	0	0
0	0	0		0	0	1		0	3	3		2	2	2
0	1	0		0	0	0		5	0	7		1	0	2
0	1	0		2	2	0		2	0	0		2	3	0
1	1	1		1	1	2		3	4	2		2	2	0
0	0	0		0	3	1		0	0	0		0	4	0
0	0	0		1	1	2		0	3	2		0	4	2
0	1	0		1	1	1		0	1	0		0	3	0
0	0	0		0	0	1		1	0	0		0	0	0
1	0	1		1	3	0		0	4	2		1	1	0
0	0	1		2	2	1		0	0	1		0	1	3
0	0	0		0	1	0		2	0	0		0	0	3
0	0	0		2	1	0		5	2	0		1	0	0
1	0	1		0	1	0		2	3	0		1	2	4
0	1	0		2	0	1		3	12	0		0	2	1
0	0	0		3	1	0		3	2	4		0	1	0
0	0	0		2	1	0		0	0	0		1	0	0
0	0	0		0	2	1		0	1	0		0	4	2
0	0	1		0	2	3		0	1	0		0	0	1
0	0	0		0	2	0		6	2	4		0	0	2
1	0	1		0	0	1		3	0	7		1	0	2
0	0	0		0	1	0		1	0	9		2	2	4
0	0	0		1	2	1		0	0	0		2	1	3
1	0	1		1	1	1		2	3	0		0	3	0
0	0	0		0	1	0		0	0	0		0	2	2
0	0	0		1	0	3		0	0	4		0	6	2
0	1	0		2	0	0		2	0	0		4	0	0
0	1	0		3	2	1		0	0	0		0	0	2
0	0	0		0	1	1		0	0	4		0	0	2
0	0	0		0	1	0		1	1	0		0	9	2
0	0	0		2	0	0		2	0	0		0	1	0
0	0	0		0	2	1		2	0	0		1	2	0
1	2	0		1	1	1		5	1	1		0	2	1
0	0	0		4	2	0		0	0	6		0	3	0
0	0	1		2	1	2		2	1	0		1	0	0
0	0	0		0	1	0		4	0	0		0	1	0
0	0	0		0	0	1		0	0	0		0	0	0
0	0	0		0	2	1		2	0	1		0	0	0
1	0	1		0	2	0		0	0	0		1	0	3
0	0	0		0	1	0		1	0	0		0	2	1
0	0	0		0	1	1		6	0	1		2	0	1
0	0	0		2	0	1		0	3	0		3	3	0
0	0	0		0	2	0		0	1	0		0	4	1
0	0	0		0	1	0		0	0	3		0	0	2
1	0	1		2	2	0		0	0	4		1	2	0
0	0	0		3	1	1		0	2	0		0	4	2
1	0	0		3	1	1		0	0	2		0	1	0
1	0	0		0	1	1		0	0	1		1	1	0
0	0	0		0	2	0		15	3	0		0	3	0
0	0	1		1	2	1		0	1	0		8	2	1
0	0	0		0	1	1		0	0	0		0	0	1
0	0	0		1	2	0		0	0	0		1	0	0
0	1	0		0	1	1		0	5	0		2	1	1
1	0	0		1	2	1		0	10	1		0	3	1
1	0	0		0	1	0		0	0	0		0	3	1
1	0	0		2	1	0		8	0	0		3	0	2
0	0	0		0	1	1		0	0	0		0	0	2
0	1	0		0	1	2		0	0	0		1	4	0
0	0	0		0	0	1		0	1	0		1	0	1
0	0	1		2	3	2		0	1	0		0	0	0
0	0	0		2	1	0		0	1	0		1	3	0
0	0	0		0	1	0		7	2	0		6	2	1
0	1	0		0	1	1		1	2	0		3	0	1
0	0	0		0	1	0		0	2	0		1	0	1
0	1	0		1	1	0		0	0	6		0	1	4
0	0	0		3	1	2		0	0	0		0	0	0
0	0	0		0	1	1		2	0	4		1	1	0
0	1	0		3	0	1		0	0	4		0	2	1
0	0	0		1	0	0		0	4	2		0	6	1
0	0	0		2	0	0		0	1	0		4	1	1
0	0	1		2	1	1		0	4	0		0	0	0
0	0	0		2	1	0		3	0	0		0	0	0
0	1	0		1	0	1		8	1	5		0	1	0
1	0	0		2	0	1		0	0	0		1	0	0
0	0	0		0	1	1		2	0	0		1	0	0
0	0	0		0	0	1		0	1	0		2	0	1
0	1	0		0	1	3		0	2	0		0	3	0
0	0	0		0	1	0		1	1	0		3	0	0
0	0	1		1	1	0		4	2	0		0	2	0
1	0	0		0	2	1		0	0	1		0	3	0
0	0	0		2	1	0		0	0	1		0	0	1
0	0	0		1	2	2		0	2	0		0	1	1
0	0	0		1	1	2		1	0	0		4	2	1
0	1	0		1	1	1		1	0	0		0	3	2
0	0	0		0	0	1		0	0	0		0	0	2
0	0	0		2	2	2		0	0	4		0	1	1
1	1	3		3	1	1		1	0	2		0	4	2
0	0	1		0	1	1		3	3	2		15	1	0
0	0	0		1	3	0		0	2	0		1	2	0
0	0	0		1	1	2		2	4	1		1	2	2
0	0	0		1	2	0		1	2	3		4	0	0
0	0	0		1	2	2		1	4	4		1	0	1
0	0	0		1	1	1		0	1	1		4	1	3
0	0	0		1	1	0		0	0	0		4	1	0
1	0	0		1	1	1		0	0	0		0	1	2
1	1	2		2	1	0		0	2	1		0	0	0
0	0	0		1	1	1		1	0	1		0	0	1
0	0	0		0	2	2		1	0	1		0	4	1
0	0	0		1	1	0		4	0	0		0	2	1
0	0	0		1	2	0		0	0	4		1	1	1
0	0	0		2	0	0		0	2	0		0	1	1
0	0	1		2	3	2		1	1	1		0	5	1
0	0	1		1	0	0		0	1	1		1	1	0
0	0	0		3	2	0		0	0	3		1	4	0
0	0	0		1	4	0		0	1	1		2	1	2
0	0	1		0	1	0		3	0	0		1	0	1
0	0	0		2	1	1		6	0	1		2	7	1
0	0	0		3	1	0		4	0	0		1	2	1
0	0	0		1	2	1		0	3	9		1	4	3
0	0	0		1	1	0		4	0	2		0	0	0
0	0	0		1	1	1		0	0	1		1	0	1
0	0	0		1	0	0		0	0	0		1	0	1
1	0	1		2	1	0		0	1	0		0	0	0
1	0	2		1	1	1		0	2	0		3	8	1
0	0	2		2	0	1		0	0	0		1	2	2
0	0	0		1	1	0		1	0	0		1	2	0
0	0	0		2	1	1		2	1	0		0	2	1
0	0	0		2	0	1		0	2	4		2	2	1
0	0	0		1	0	0		0	1	0		1	3	1
0	0	0		1	1	0		4	0	0		0	2	1
0	0	1		1	0	0		0	4	0		0	2	0
0	0	0		1	0	1		0	0	0		1	2	2
0	0	0		1	1	3		0	0	3		0	3	0
0	0	0		2	1	0		0	1	0		0	0	1
1	0	1		1	1	0		2	0	0		1	1	1
0	0	0		1	1	1		0	0	0		0	3	2
0	0	0		0	1	0		3	0	2		0	2	1
0	0	0		0	1	1		4	1	2		1	9	1
0	0	0		2	1	1		1	0	1		1	4	0
0	0	2		0	0	0		0	1	0		0	3	0
0	0	1		2	1	0		0	1	0		1	1	1
0	0	0		1	1	3		0	1	1		1	0	0
0	0	0		3	1	0		3	0	0		0	0	2
0	0	0		2	1	0		0	0	3		2	1	0
0	0	0		0	0	1		0	2	0		0	2	3
0	0	2		2	2	0		0	0	0		0	0	2
0	1	1		1	1	1		0	1	0		2	2	1
0	0	0		1	0	2		0	0	5		1	0	1
0	0	0		2	1	1		0	0	1		1	0	3
0	0	0		1	2	1		0	1	1		1	2	2
2	0	0		2	2	0		3	3	0		1	0	0
1	0	1		2	0	0		0	0	0		4	0	0
2	0	1		1	1	0		0	0	0		9	1	0
0	0	1		2	2	2		3	0	0		0	0	0
1	0	0		3	1	1		1	1	1		7	0	0
1	0	0		2	1	0		0	4	5		9	1	1
0	0	0		1	1	1		0	1	0		2	9	1
2	0	0		2	1	0		0	2	0		2	0	1
1	0	0		1	1	1		2	2	0		0	0	1
1	1	0		1	1	1		0	0	5		1	2	3
0	0	0		1	2	0		2	2	0		3	0	0
1	2	0		2	0	0		0	0	0		0	1	2
1	0	1		1	2	0		1	0	0		4	2	1
1	0	4		1	1	2		0	0	1		0	0	1
1	0	0		2	0	0		0	0	7		0	0	1
1	0	0		3	0	0		3	0	0		0	0	0
2	0	0		3	0	2		2	4	1		1	0	0
2	1	0		1	0	0		0	2	0		1	2	0
0	1	1		1	2	1		0	0	0		1	2	0
0	0	0		1	0	0		1	0	0		1	0	1
1	0	0		1	0	0		1	1	4		0	0	0
1	2	0		2	3	0		2	1	1		0	2	2
2	0	0		1	1	2		2	0	0		0	1	2
0	2	0		1	2	2		0	0	0		0	0	0
1	0	0		1	1	0		1	2	0		2	0	0
0	0	0		1	1	1		0	0	8		6	1	0
1	0	1		0	1	1		0	0	0		0	1	4
2	0	0		2	2	0		2	0	0		1	7	0
1	0	0		0	2	0		2	1	2		1	1	1
0	1	0		2	2	3		0	0	0		0	1	0
0	0	0		2	0	0		0	0	0		2	0	0
0	0	1		1	3	0		0	0	6		2	0	2
0	0	1		1	1	1		0	0	0		0	9	3
0	0	0		4	1	3		0	0	0		0	4	0
0	0	0		2	1	0		1	2	0		0	7	1
1	1	0		1	1	0		7	7	1		0	6	2
1	1	0		1	1	2		0	1	0		3	5	0
1	2	0		2	0	1		0	1	0		0	3	0
1	0	0		2	1	2		8	1	0		1	0	2
1	1	0		1	0	1		4	0	6		3	0	0
1	1	0		1	1	2		0	0	0		0	0	0
1	2	0		2	1	0		0	0	0		5	0	0
0	2	0		2	1	0		0	2	0		1	5	0
0	1	0		1	1	3		0	2	1		0	1	0
1	0	0		1	2	0		4	2	0		0	1	1
1	0	1		1	2	0		1	0	0		0	2	0
2	0	1		2	1	2		0	2	1		3	0	0
1	1	0		1	1	0		0	1	1		0	0	0
1	0	0		1	3	1		0	0	3		0	0	2
0	0	0		0	1	2		0	1	1		0	0	1
0	0	0		0	1	0		0	1	0		0	2	0
0	0	0		2	0	2		3	6	0		1	3	0
1	0	0		2	1	1		4	1	0		0	0	0
1	0	0		1	0	1		0	0	0		0	1	0
2	1	0		1	1	0		0	0	0		0	0	0
0	2	0		1	1	0		0	0	0		0	1	0
1	1	1		1	1	1		0	0	0		0	0	0
1	1	0		1	2	0		1	2	1		0	0	0
1	0	1		1	1	3		1	0	0		0	0	0
1	2	1		1	1	2		1	0	0		6	3	0
1	1	1		1	1	0		2	6	1		3	1	1
1	0	0		2	1	0		0	1	0		0	1	1
0	0	1		2	1	0		0	0	2		0	1	1
1	1	1		4	1	2		0	0	0		15	0	1
0	0	0		3	1	0		3	0	0		3	0	0
2	1	0		2	2	0		1	0	0		6	1	1
0	1	0		1	1	0		0	1	6		0	3	1
1	0	0		2	2	1		0	1	0		6	3	2
0	0	0		0	2	0		1	1	0		0	1	2
0	0	0		1	0	2		0	0	0		0	0	2
2	0	2		1	1	0		4	0	0		0	2	0
1	1	0		1	1	2		0	5	6		2	2	0
0	0	0		0	0	2		0	0	0		0	3	1
0	0	0		1	2	0		0	1	0		1	3	0
0	0	1		1	2	0		1	0	1		0	2	1
0	1	0		4	1	2		0	4	6		0	3	1
1	0	1		2	1	1		0	1	0		0	4	2
1	0	0		2	1	0		4	0	0		0	7	1
1	1	0		0	2	0		3	2	0		2	3	2
1	0	0		1	2	0		3	2	6		1	1	0
2	0	0		1	1	1		2	0	0		1	3	2
2	0	0		0	0	0		2	0	5		2	0	2
0	1	0		0	1	0		0	3	0		0	0	1
0	1	1		0	0	0		0	0	0		0	0	3
1	1	1		0	1	1		0	0	1		0	0	1
0	0	0		0	1	0		0	0	0		0	5	2
0	1	2		0	2	2		0	0	1		0	2	0
0	0	2		0	1	1		1	0	1		0	0	0
1	0	0		2	2	0		1	0	2		4	0	0
2	0	0		1	2	1		0	1	0		0	0	0
1	0	0		0	2	0		1	2	0		0	2	3
0	2	0		4	1	2		4	0	0		1	2	2
0	2	0		1	0	1		1	0	1		5	2	1
0	0	0		1	0	1		1	1	3		4	3	0
0	0	1		1	0	3		1	0	3		0	4	0
0	0	0		1	2	2		1	0	0		0	3	2
1	1	0		0	2	0		0	0	0		0	0	1
0	1	0		1	2	1		0	0	0		0	2	1
0	0	0		0	1	1		0	0	0		0	3	1
2	0	2		0	1	0		0	0	5		5	3	1
1	0	0		2	1	0		0	0	4		3	2	2
2	0	0		3	2	2		0	0	0		0	2	0
2	0	0		1	2	0		2	5	0		1	2	0
1	0	0		2	2	1		2	4	0		0	0	0
0	0	0		1	0	0		0	0	0		3	4	2
0	0	0		4	0	2		0	2	4		0	0	2
0	1	1		5	1	1		0	4	4		0	0	4
0	0	0		1	2	1		0	0	3		0	3	0
0	0	0		0	1	0		0	1	0		3	2	0
0	0	0		1	4	0		4	0	0		2	3	2
2	0	0		1	0	3		3	1	0		0	3	2
0	1	0		2	1	1		1	0	4		0	0	5
0	1	0		1	1	1		0	4	0		0	0	1
2	0	2		2	1	0		0	0	0		0	0	0
1	0	0		1	1	2		1	2	0		0	0	4
1	0	1		0	1	0		0	2	1		1	0	2
1	0	0		1	2	2		0	0	0		0	5	4
0	1	2		2	1	1		4	0	4		0	0	0
0	0	1		3	0	3		3	0	2		9	0	0
0	0	0		1	0	0		1	1	2		0	0	1
0	1	0		1	2	0		0	0	0		0	1	1
1	0	0		1	3	0		0	1	0		0	0	1
1	0	0		2	1	1		2	0	0		0	0	1
0	0	0		0	0	1		2	0	4		0	1	1
2	0	1		1	1	0		2	0	0		3	1	0
1	0	2		1	1	1		0	7	5		3	3	0
1	1	0		0	2	0		0	4	4		3	2	2
2	1	0		1	0	1		0	0	0		0	0	2
1	0	0		1	1	3		0	1	2		0	0	1
1	0	0		1	1	0		2	0	0		7	1	1
0	0	0		1	1	2		0	0	0		0	1	2
0	0	0		1	2	1		0	0	0		5	2	1
0	0	0		2	2	1		0	0	0		0	1	0
0	0	1		0	1	2		2	1	3		0	0	0
0	0	1		1	1	1		1	1	1		0	3	0
0	0	0		2	2	2		3	0	0		0	1	1
0	0	5		1	1	0		3	0	0		0	0	7
0	0	3		1	2	0		2	2	0		0	0	2
0	0	2		2	1	2		1	0	0		4	0	4
0	0	0		2	1	0		4	1	2		1	1	1
0	0	0		1	1	3		0	1	3		0	0	0
0	0	0		3	1	2		0	0	1		1	0	0
0	0	0		1	3	1		0	1	4		1	1	0
0	0	0		1	2	2		3	2	0		3	1	0
0	1	1		1	1	1		1	0	0		0	2	0
0	0	1		1	1	2		0	1	0		9	1	1
0	0	0		1	0	2		1	3	4		3	3	1
0	1	0		1	1	0		4	2	2		0	0	2
0	0	1		3	0	2		14	2	0		0	0	1
0	1	0		1	1	2		0	0	0		5	2	0
0	0	1		3	2	1		0	0	0		0	2	0
0	0	0		0	2	1		4	5	4		0	0	0
0	0	1		1	3	2		3	2	0		0	0	1
0	1	1		2	1	2		1	2	0		1	1	4
0	0	1		2	2	2		0	0	1		0	1	1
0	0	3		2	0	4		0	1	0		0	1	4
0	0	0		1	0	2		1	0	0		1	2	0
0	0	0		1	2	2		3	0	1		2	3	1
1	0	0		1	2	1		0	0	1		4	0	0
2	0	0		1	2	0		0	0	0		3	0	0
1	0	0		1	1	0		1	0	0		6	2	0
0	0	0		2	0	0		0	1	6		0	4	0
2	0	0		1	1	0		0	1	0		2	4	1
2	0	0		1	1	2		2	0	2		0	0	0
1	0	0		0	1	1		0	3	0		0	0	0
0	0	0		1	2	0		2	0	4		6	0	2
2	1	2		1	1	2		5	0	3		4	0	2
1	0	2		1	1	2		0	0	3		1	0	0
1	1	1		2	1	1		0	0	3		0	0	2
2	1	2		0	0	1		0	2	0		9	4	2
1	1	0		1	0	1		0	0	0		0	0	0
0	0	0		2	2	2		0	0	4		0	0	1
1	0	0		0	1	0		0	2	1		1	1	0
0	0	0		0	1	1		7	2	0		0	1	0
1	0	0		1	2	0		1	0	0		0	3	3
1	1	0		1	1	2		4	0	2		4	1	2
0	0	0		1	1	3		2	0	0		2	2	1
1	0	0		2	1	1		0	4	2		0	0	0
1	2	1		1	1	0		0	0	0		0	0	1
0	0	0		1	1	1		0	0	4		1	1	1
0	0	1		2	0	2		0	0	2		1	4	2
0	0	2		0	3	0		0	3	0		0	0	0
0	0	1		2	1	0		1	1	1		0	0	0
0	0	1		0	1	3		0	0	3		1	0	0
0	0	0		2	1	2		4	1	3		0	4	0
0	0	0		1	2	4		0	0	0		0	1	0
0	0	0		1	2	0		0	0	2		1		3
1	1	0		2	0	1		3	0	0		0		0
0	0	0		1	1	0		1	2	1		0		1
0	0	1		3	2	2		0	0	0		2		2
2	0	0		1	0	0		0	0	0		5		1
0	1	0		2	1	0		3	7	0		2		1
0	0	1		1	3	0		5	0	4		0		0
0	0	0		1	2	1		0	1	0		0		0
2	2	0		1	2	0		4	0	0		0		1
0	0	0		1	1	0		0	0	0		2		0
0	1	1		1	2	1		0	5	0		0		1
0	0	0		1	0	0		2	6	4		0		0
0	0	1		3	0	4		2	0	5		2		0
2	3	0		1	0	0		0	1	3		2		2
1	0	2		1	2	1		0	1	0		2		2
1	2	0		2	2	0		0	0	0		2		0
0	0	0		2	2	2		7	0	0		3		0
1	0	0		2	1	1		11	0	0		1		0
2	2	0		1	0	1		3	0	0		3		1
2	1	1		1	0	0		0	0	0		0		1
1	0	1		1	1	2		0	0	4		6		1
0	0	1		1	2	3		1	0	1		0		0
0	0	2		1	1	3		0	3	0		0		0
3	0	1		1	0	0		0	0	0		4		1
2	0	1		2	0	1		0	3	0		0		0
0	0	0		1	1	3		4	2	2		5		3
0	0	2		1	1	0		3	0	3		0		0
0	1	1		1	1	0		0	0	3		2		1
0	1	0		1	1	0		0	0	0		2		1
2	2	1		1	1	0		0	4	0		0		1
1	1	1		1	1	2		2	1	2		0		4
1	2	1		0	1	1		0	6	0		0		0
0	0	1		0	2	3		0	1	0		4		0
0	1	1		1	2	1		0	0	2		2		1
0	0	1		1	1	1		1	1	0		0		2
0	0	1		1	1	0		0	3	1		0		0
0	1	1		3	0	0		0	1	1		1		6
3	1	1		1	1	0		0	0	3		0		0
0	0	0		1	1	1		2	2	3		5		1
0	0	0		2	1	0		0	1	0		0		0
0	0	0		0	2	0		0	0	0		6		1
1	0	1		2	1	2		1	0	3		0		2
0	1	0		1	1	0		7	3	0		0		1
0	1	0		1	1	0		0	1	0		0		2
1	0	0		0	1	3		0	0	0		0		0
0	0	0		4	1	0		0	0	2		1		0
2	0	0		1	1	1		5	0	0		2		1
0	1	0		0	1	0		0	1	0		3		0
0	0	0		0	1	0		0	1	0		1		2
2	1	0		1	2	1		5	0	0		4		0
1	0	0		0	1	2		1	1	0		1		1
1	0	0		0	2	0		0	2	3		1		0
0	1	0		0	1	2		0	0	0		0		4
0	0	0		1	1	1		0	0	0		4		0
1	0	0		0	2	0		0	0	0		1		0
3	1	0		1	1	1		0	2	2		0		1
0	1	0		4	0	0		0	0	0		0		2
0	1	0		0	2	0		2	2	0		0		3
1	0	1		0	2	2		0	3	1		2		0
0	0	1		0	1	0		0	2	0		0		0
1	1	1		2	3	2		0	0	0		0		1
0	0	1		0	0	1		0	0	1		0		0
1	0	1		0	1	1		1	3	0		1		1
1	0	1		0	1	1		1	5	0		2		3
0	0	0		2	2	0		2	1	0		1		0
0	0	0		1	1	1		1	3	1		0		0
0	1	1		3	1	2		2	2	2		0		2
2	0	0		4	1	2		0	2	0		0		0
0	0	1		2	1	1		0	0	0		0		1
0	0	1		4	0	1		0	2	1		0		0
0	0	0		1	1	2		1	1	0		0		1
0	0	0		2	2	2		1	1	0		1		2
0	2	1		1	1	3		1	0	1		0		0
0	0	1		1	2	1		0	1	1		0		0
0	0	1		2	2	1		1	0	1		4		3
0	1	1		1	2	0		1	0	3		1		0
0	0	1		2	1	0		0	4	2		1		0
0	0	0		2	3	1		0	0	2		3		1
1	0	0		3	1	2		0	3	0		0		1
0	0	0		0	2	1		0	2	2		0		4
0	0	0		1	1	2		3	1	0		0		1
2	1	0		2	2	2		2	0	0		1		1
0	0	1		2	1	1		0	0	0		2		1
1	0	0		0	0	2		6	6	0		0		0
1	0	0		2	0	2		3	2	1		0		0
1	1	1		0	0	1		0	4	0		5		1
0	1	1		1	1	1		1	3	0		1		0
0	0	0		0	2	2		0	0	1		1		0
1	0	0		0	2	1		6	1	0		0		1
0	0	1		0	0	3		0	0	3		0		0
0	1	0		0	1	1		0	2	2		1		0
0	1	0		0	1	2		1	6	2		1		1
0	0	0		1	1	0		0	1	0		2		0
1	0	0		0	2	0		0	0	0		0		0
0	0	1		0	1	1		0	0	0		0		2
0	1	0		0	1	1		1	0	1		0		0
0	1	0		1	0	2		0	0	2		0		0
1	0	0		1	1	2		0	3	4		2		0
0	0	0		0	1	2		0	0	4		2		0
0	1	1		0	1	2		6	0	2		2		3
0	0	1		4	1	2		1	3	0		0		0
0	0	0		2	0	1		0	0	3		1		1
0	1	0		2	1	1		3	0	2		2		1
0	0	3		2	0	1		1	3	2		3		1
1	0	0		1	0	1		0	4	4		0		1
2	0	0		3	1	0		1	0	0		3		0
0	1	0		0	1	0		0	0	2		3		1
1	0	0		0	0	0		0	0	0		0		0
0	0	0		1	2	1		0	0	0		1		1
0	2	0		1	1	1		0	0	2		1		1
0	0	2		1	0	4		0	0	0		1		2
0	2	1		1	1	1		2	3	3		0		0
0	0	0		2	1	1		6	3	3		0		0
0	1	0		2	1	1		0	0	0		0		2
0	1	0		0	1	2		1	0	0		0		1
2	1	0		0	1	1		0	0	0		0		1
1	2	0		1	1	2		0	0	0		0		2
0	1	0		1	1	1		0	3	1		1		0
0	0	0		1	1	2		3	2	3		2		1
2	0	0		0	0	0		0	4	1		1		1
0	0	0		0	0	2		0	3	0		0		2
0	0	0		0	0	0		6	0	0		0		1
1	0	1		2	0	3		2	0	0		2		0
2	0	1		1	2	1		0	0	0		2		1
0	0	0		2	3	0		0	0	3		4		0
0	0	0		0	1	0		1	1	3		0		1
0	2	1		1	0	2		0	1	0		0		1
0	1	0		1	0	0		2	0	0		0		0
1	0	1		1	0	1		2	0	3		1		2
0	1	0		1	0	1		2	0	3		1		3
1	0	0		1	1	2		0	5	3		0		0
1	0	0		0	1	1		1	3	0		0		0
0	4	0		2	2	1		0	0	0		0		0
0	0	0		1	1	0		0	0	4		1		0
0	2	0		2	1	0		0	0	3		0		0
0	0	0		0	1	1		0	4	4		2		1
0	1	0		1	1	2		0	2	0		4		1
1	0	0		1	1	2		0	1	3		1		2
1	0	1		1	1	0		3	0	2		3		0
1	0	0		2	2	3		0	0	0		0		1
0	0	2		0	1	1		3	0	0		1		0
0	0	0		4	2	0		1	0	0		0		2
0	0	0		0	1	0		0	3	3		0		0
0	0	0		4	1	3		2	0	0		2		0
0	0	0		3	3	0		1	3	0		0		0
0	0	0		1	0	1		0	2	0		4		4
0	2	1		1	1	0		0	4	1		3		0
0	2	1		0	2	1		0	2	0		2		0
0	2	0		1	1	2		1	2	0		0		0
0	3	0		1	2	2		0	2	2		0		2
0	0	2		1	1	1		3	3	2		1		1
0	0	0		0	1	2		1	0	2		2		0
0	1	2		2	1	1		0	0	4		2		0
0	1	0		1	1	0		0	0	0		0		2
0	0	0		1	2	1		0	0	0		3
0	0	0		2	2	2		0	2	2		4		3
0	0	0		1	1	1		0	2	0		3		0
1	0	0		1	1	2		0	3	1		1		3
0	0	1		1	1	1		0	0	0		0		0
0	2	0		2	1	2		0	2	4		0		1
0	1	0		1	0	1		0	0	1		3		1
0	2	0		1	0	2			0	1		2		0
0	1	0		0	2	0			0	0		0		0
1	0	0		0	1	2			0	1		1		1
2	0	1		0	0	1			0	0		2		0
0	2	1		2	0	1			2	2		1		5
		2		1	0	2			3	0
		0		1	0	0			1	3
		1		4	1	3			1	0
		1		4	1	0			1	0
		2		2	0	1				2
		2		0	0	1				3
		1		0	0	1				4
		0		0		2				0
		0		0		4				0
		0		0		1				3
		1		0		1				2
		0		1		3				0
				1		2				0
				1		1				0
				1						0
				0						0
				1
				3
				2
				2
				0
				2
				2
				1
				2
				2
				2
				2
				2
				0
				4
				1
				1
				1
				0
				2
				3
				0
				1
				0
				1
				1
				0
				0
				1
				1
				2
				2
				0
				0
				1
				0
				1
				2
				1
				0
				1
				3
				0
				1
				2
				1
				2
				3
				2
				3
				1
				1
				0
				2
				2
				1
				0
				2
				0
				1
				1
				1
				0
				0
				0
				0
				0
				3
				4
				2
0.434	0.346	0.386719	#DIV/0!	1.17577	1.08876	0.951362		1.13333	1.07143	1.12791	#DIV/0!	1.202	1.48802	0.92986
