# Supplementary material for: Essential roles of Caspase-3 in facilitating Myc-induced genetic instability and carcinogenesis
Source: eLife journal article supplement (doi:10.7554/elife.26371), 2017-07-10
Supplement: supp [file elife_poa_e26371_Fig.4_source_data_2.xlsx]

## Sheet: Sheet1
Replicate	Number of soft agar colones per replicate
	Vector Control	Casp3+nEndoG	Casp3+Myc+nEndoG
1	10	2	36
1	12	22	156
1	6	10	56
2	6	17	71
2	10	5	91
2	4	8	77
3	12	12	103
3	10	8	80
3	19	11	68
4	6
4	10
4	4
5	10
5	4
5	6
6	25
6	31
	10.8824	10.5556	82
	7.55714	6.04382	33.7935
	1.83287	3.4894	19.5107
