# Supplementary material for: Essential roles of Caspase-3 in facilitating Myc-induced genetic instability and carcinogenesis
Source: eLife journal article supplement (doi:10.7554/elife.26371), 2017-07-10
Supplement: supp [file elife_poa_e26371_Fig.4_source_data_3.xlsx]

## Sheet: Sheet1
Vector Control	Tumor Size mm3
Day	7	11	14	18	21	25	28	32	35	39	42	46	49	53	56	59
1	0	0	0	0	0	0	0	0	0	0	0	0	0	0	0	0
2	0	0	0	0	0	0	0	0	0	0	0	0	0	0	0	0
3	0	0	0	0	0	0	0	0	0	0	0	0	0	0	0	0
4	0	0	0	0	0	0	0	0	0	0	0	0	0	0	0	0
5	0	0	0	0	0	0	0	0	0	0	0	0	0	0	0	0
6	0	0	0	0	0	0	0	0	0	0	0	0	0	0	0	0
7	0	0	0	0	0	0	0	0	0	0	0	0	0	0	0	0
8	0	0	0	0	0	0	0	0	0	0	0	0	0	0	0	0
Casp3KO+nEndoG	Tumor Size mm3
Day	7	11	14	18	21	25	28	32	35	39	42	46	49	53	56	59
1	0	0	0	0	0	0	0	0	0	0	0	0	0	0	0	0
2	0	0	0	0	0	0	0	0	0	0	0	0	0	0	0	0
3	0	0	0	0	0	0	0	0	0	0	0	0	0	0	0	0
4	0	0	0	0	0	0	0	0	0	0	0	0	0	0	0	0
5	0	0	0	0	0	0	0	0	0	0	0	0	0	0	0	0
6	0	0	0	0	0	0	0	0	0	0	0	0	0	0	0	0
7	0	0	0	0	0	0	0	0	0	0	0	0	0	0	0	0
8	0	0	0	0	0	0	0	0	0	0	0	0	0	0	0	0
Casp3KO+nEndoG+Myc	Tumor Size mm3
	7	11	14	18	21	25	28	32	35	39	42	46	49	53	56	59
1	0	0	0	3.564	4.6	6.05	9.464	11.76	17.1	28.512	32.4	43.2	55.566	65.8125	83.75	93.288
2	0	0	0	0	1.69	2.1125	6	11.83	12.8125	29.808	36.288	49.392	50.8475	66.654	69.12	75
3	0	0	0	1.6875	2.25	5	8.928	13.72	18	23.04	30.625	50.625	65	75.712	86.022	90.75
4	0	0	0	0	0	0	1.2675	1.2675	4	5.0715	9.2575	10.58	14.58	21.504	31.104	36.1
5	0	0	0	1.31288	2.135	3.29063	6.41487	9.64437	12.9781	21.6079	27.1426	38.4493	46.4984	57.4206	67.499	73.7845
6	0	0	0	0	0	0	0	0	0	0	0	0	0	0	0	0
7	0	0	0	0	0	0	0	0	0	0	0	0	0	0	0	0
8	0	0	0	0	0	0	0	0	0	0	0	0	0	0	0	0
Casp3KO+nEndoG+Myc	0	0	0	0.820547	1.33437	2.05664	4.0093	6.02773	8.11133	13.5049	16.9641	24.0308	29.0615	35.8879	42.1869	46.1153
