# Supplementary material for: Essential roles of Caspase-3 in facilitating Myc-induced genetic instability and carcinogenesis
Source: eLife journal article supplement (doi:10.7554/elife.26371), 2017-07-10
Supplement: supp [file elife_poa_e26371_Fig._2_source_data_2.xlsx]

## Sheet: Sheet1
Replicate
	MCF10+Casp 3	MCF+Myc+Casp3	Casp3+Casp3	Casp3+Myc+Casp3
1	15	130	5	83
1	8	115	8	95
1	10	108	7	85
2	14	132	3	100
2	20	150	9	70
2	5	110	9	85
3	8	107	2	89
3	14	95	6	92
3	8	116	7	87
4
4
4
5
5
5
6
6
	11.3333	118.111	6.22222	87.3333
	4.71699	16.5487	2.48886	8.47054
	1.57233	5.51625	0.829621	2.82351
		0.00292833
