# Supplementary figures and images for: Essential roles of Caspase-3 in facilitating Myc-induced genetic instability and carcinogenesis
Source: eLife journal article supplement (doi:10.7554/elife.26371), 2017-07-10

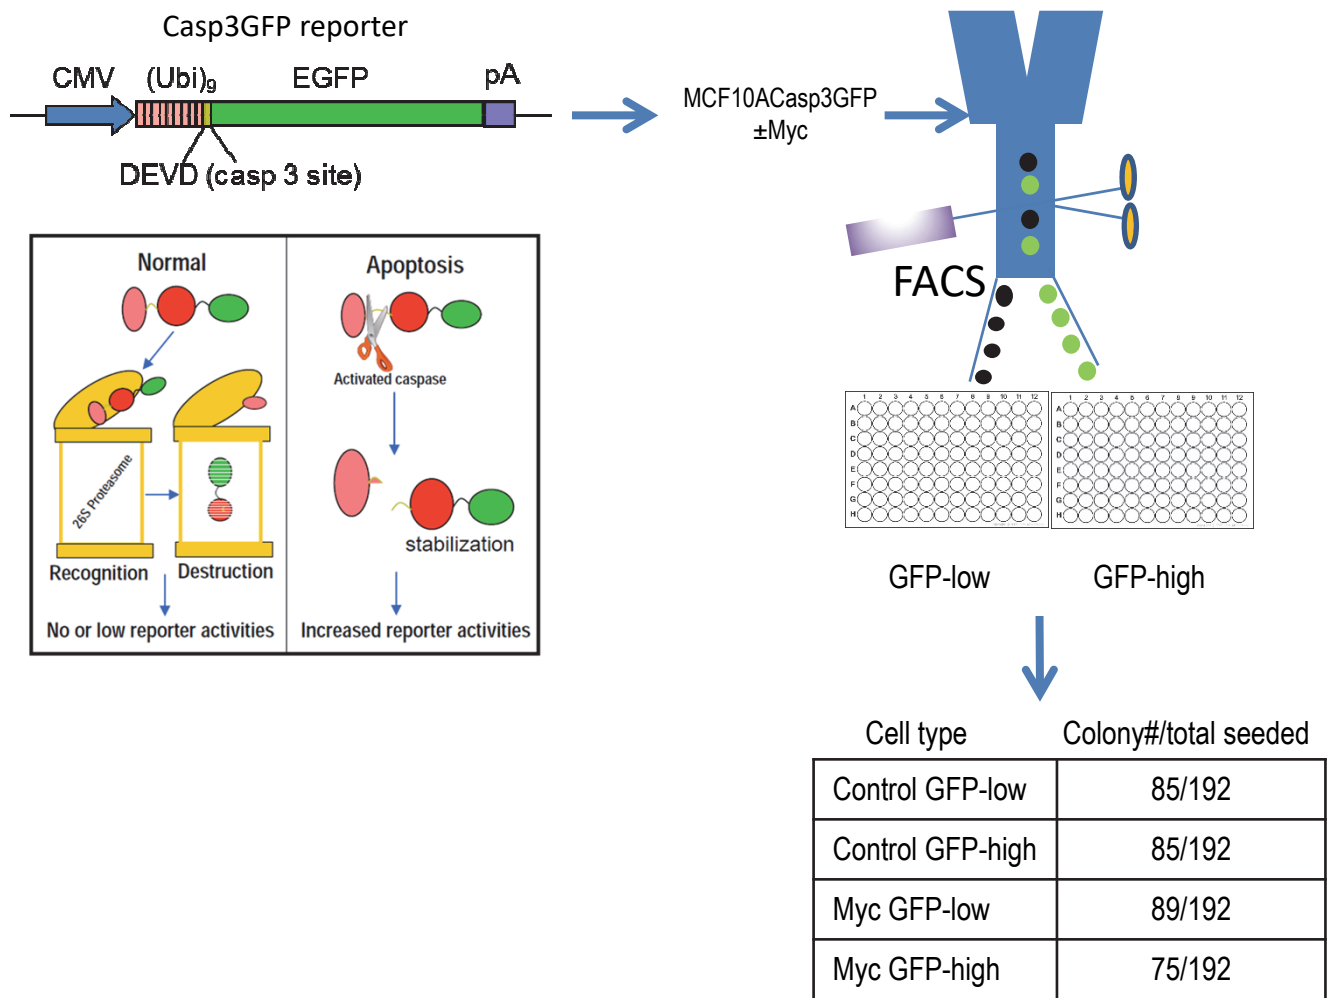

Fig.1-figure supplement 1

Supplement: supp [file elife_poa_e26371_Figure_1_figure_supplement1.pdf › elife_poa_e26371_Figure_1_figure_supplement1.pdf]

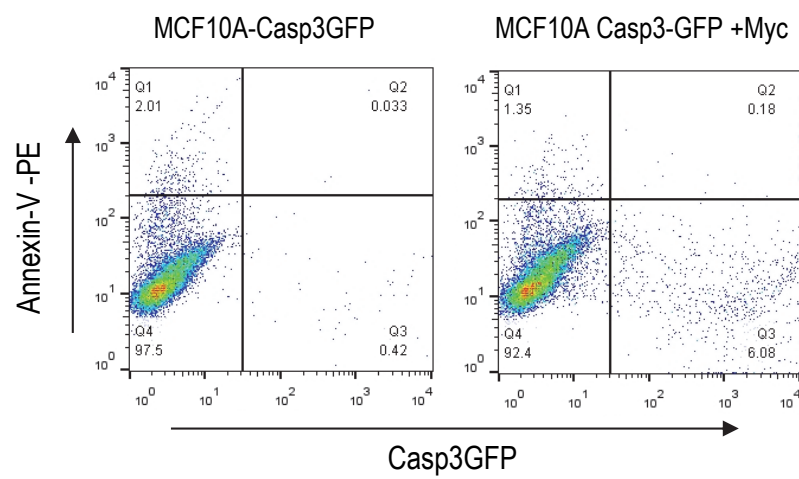

Fig.1-figure supplement 2

Supplement: supp [file elife_poa_e26371_Figure_1_figure_supplement2.pdf › elife_poa_e26371_Figure_1_figure_supplement2.pdf]

**A.**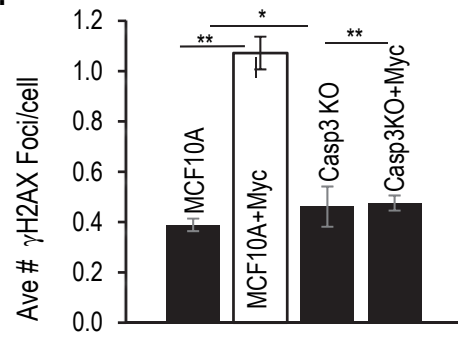**B.**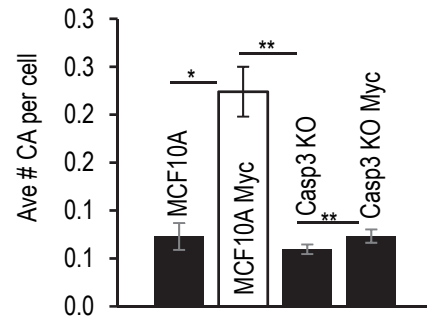

Fig.1-figure supplement 3

Supplement: supp [file elife_poa_e26371_Figure_1_figure_supplement3.pdf › elife_poa_e26371_Figure_1_figure_supplement3.pdf]

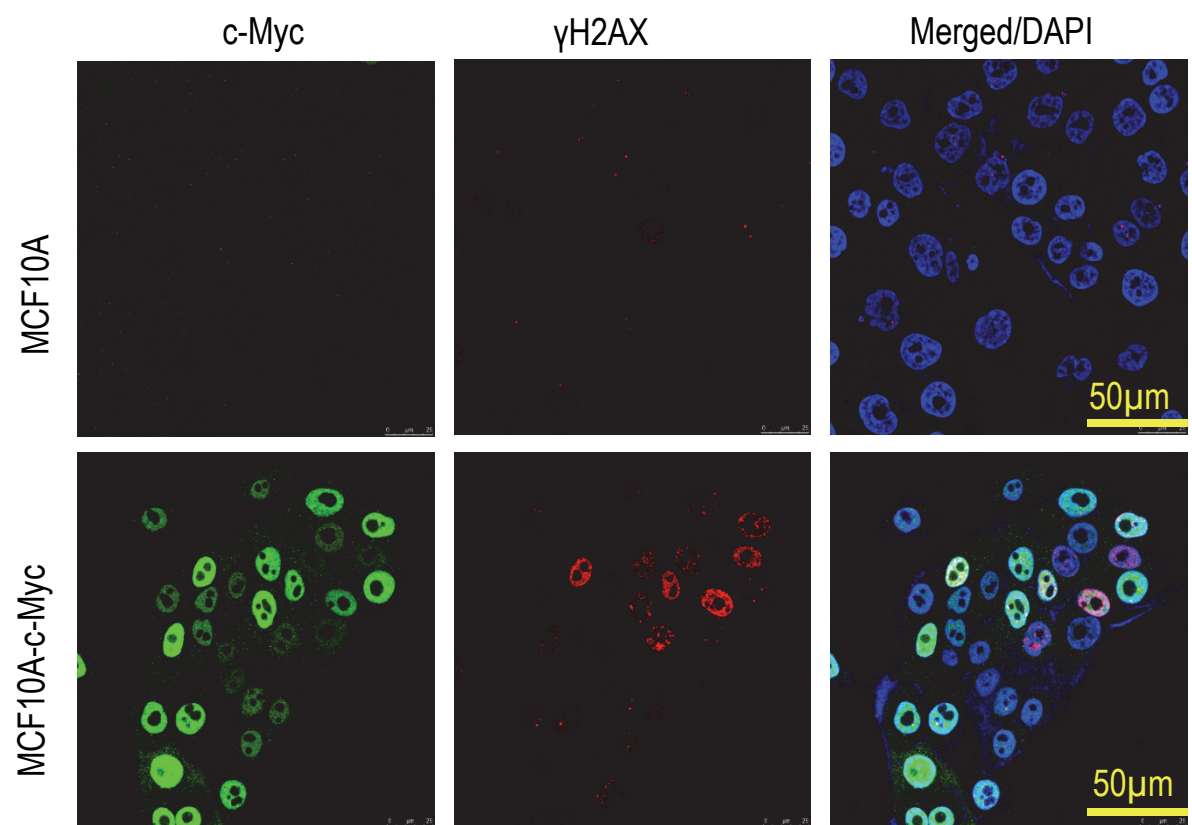

Fig.1-figure supplement 4

Supplement: supp [file elife_poa_e26371_Figure_1_figure_supplement4.pdf › elife_poa_e26371_Figure_1_figure_supplement4.pdf]

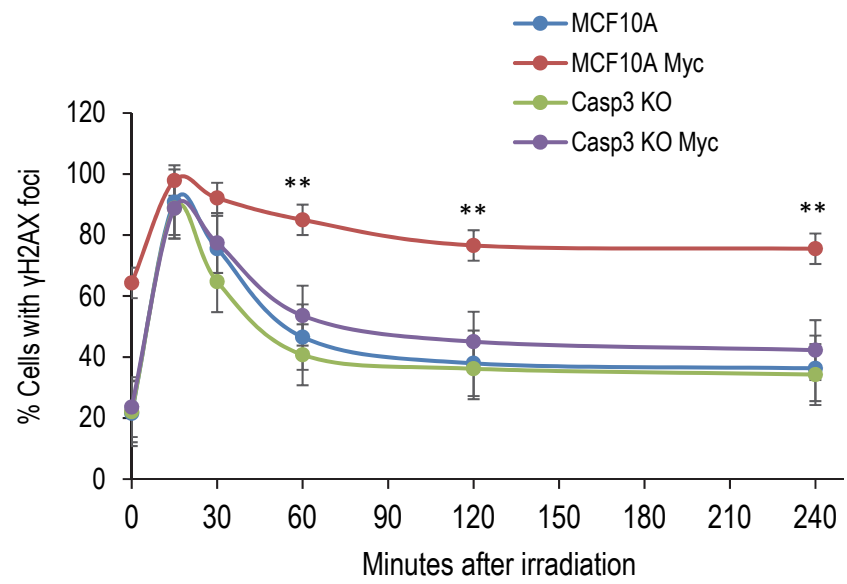

Fig.1-figure supplement 5

Supplement: supp [file elife_poa_e26371_Figure_1_figure_supplement5.pdf › elife_poa_e26371_Figure_1_figure_supplement5.pdf]

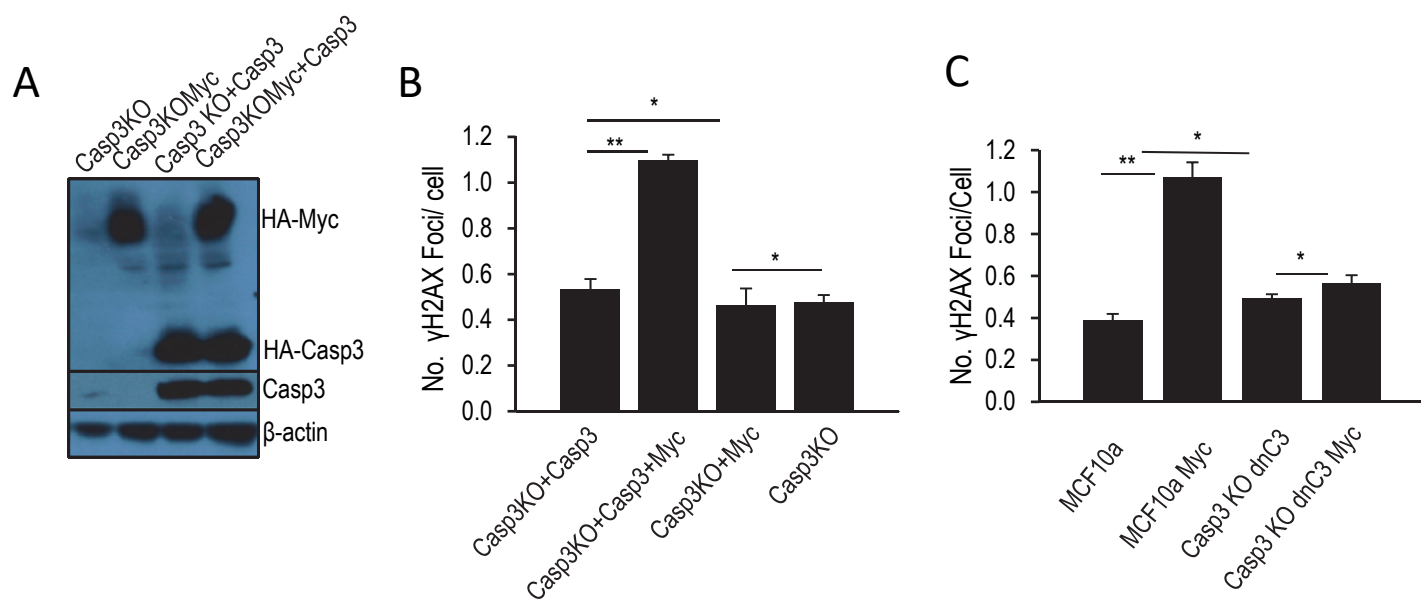

Fig.1-figure supplement 6

Supplement: supp [file elife_poa_e26371_Figure_1_figure_supplement6.pdf › elife_poa_e26371_Figure_1_figure_supplement6.pdf]

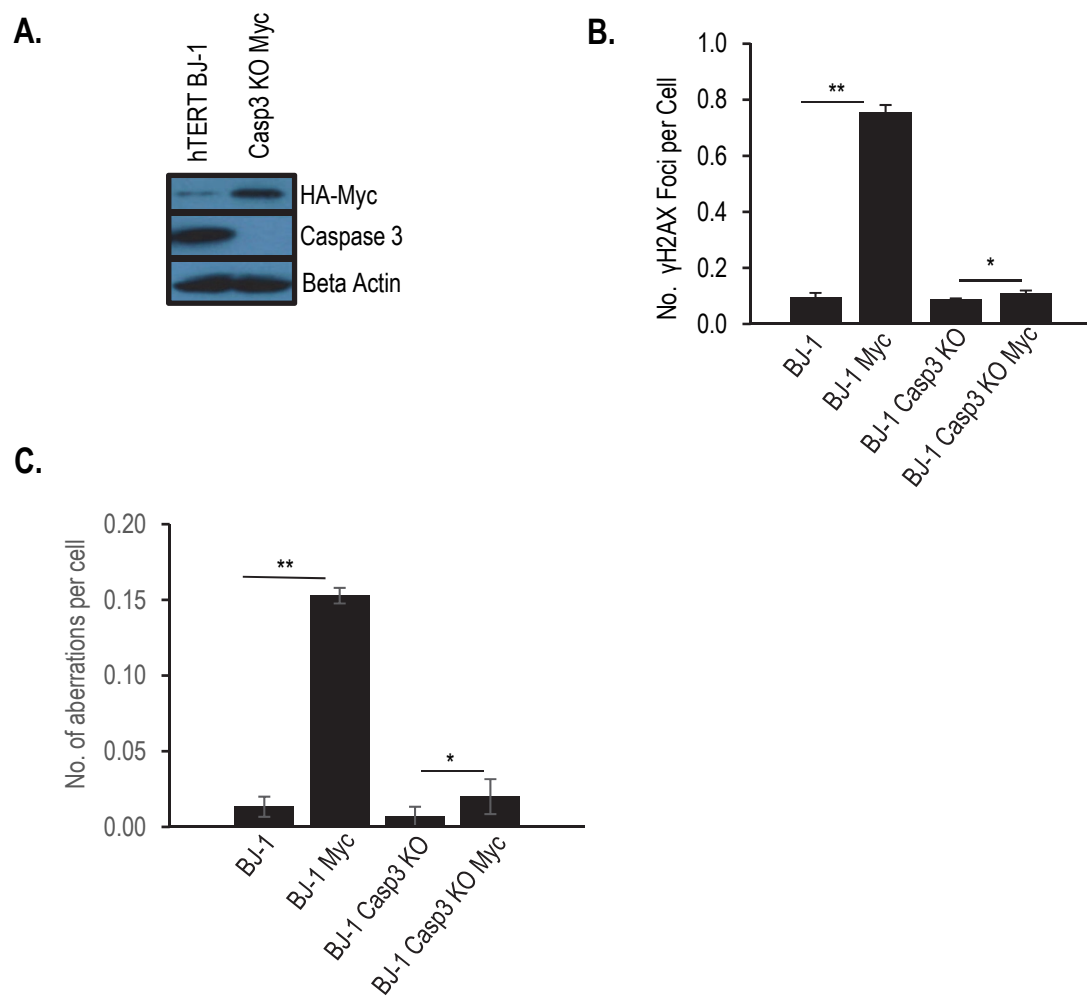

Fig.1-figure supplement 7

Supplement: supp [file elife_poa_e26371_Figure_1_figure_supplement_7.pdf › elife_poa_e26371_Figure_1_figure_supplement_7.pdf]

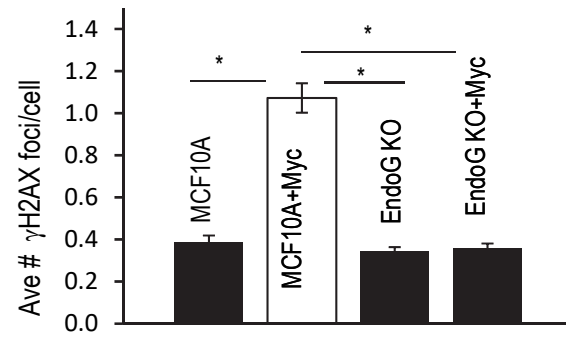

Fig.3-figure supplement 1

Supplement: supp [file elife_poa_e26371_Figure_3_figure_supplement1.pdf › elife_poa_e26371_Figure_3_figure_supplement1.pdf]

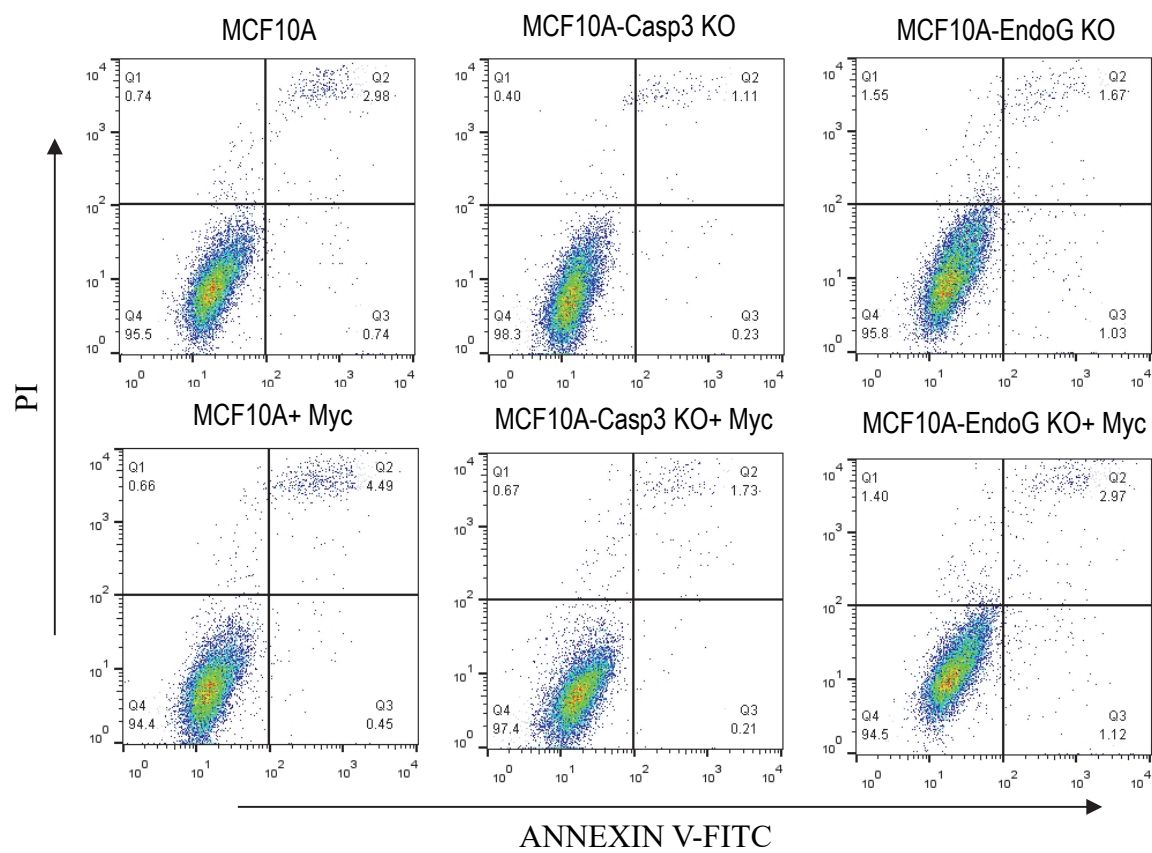

Fig.3-figure supplement 2

Supplement: supp [file elife_poa_e26371_Figure_3_figure_supplement2.pdf › elife_poa_e26371_Figure_3_figure_supplement2.pdf]

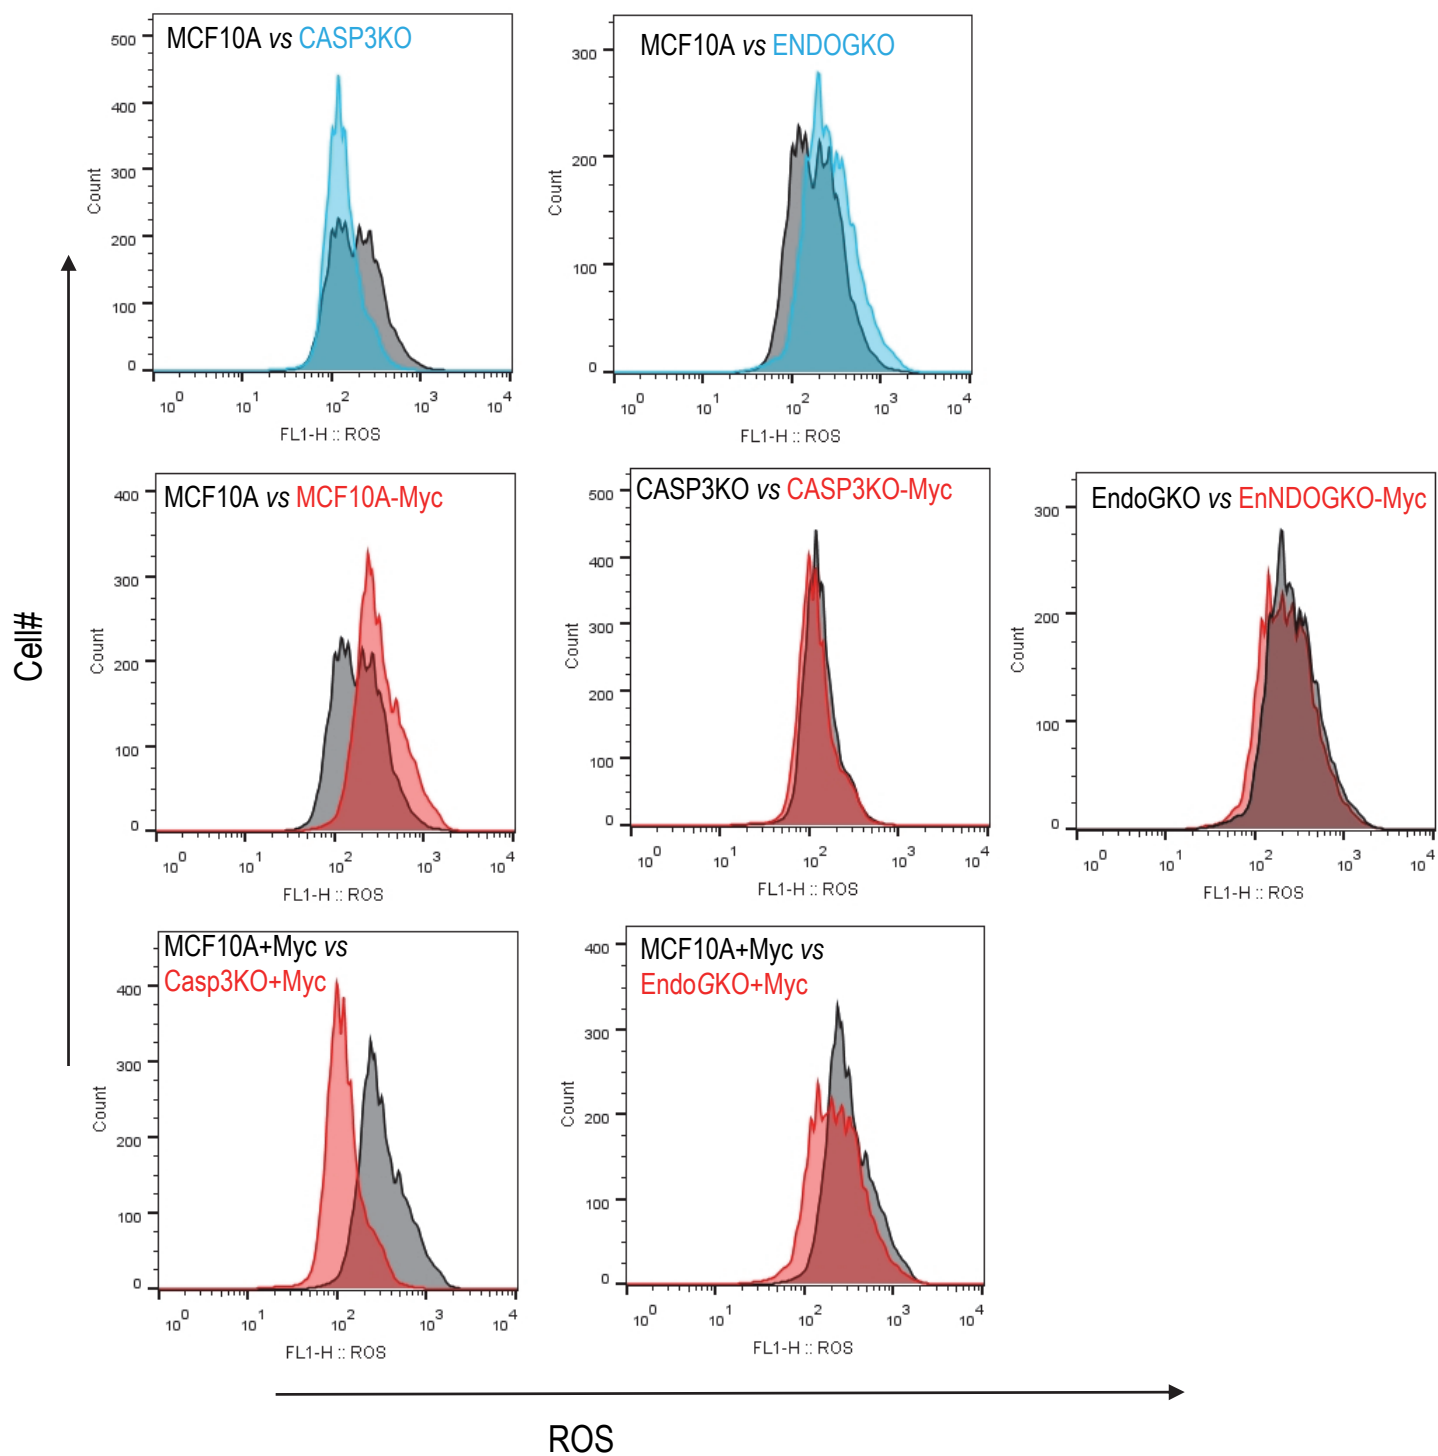

Fig.3-figure supplement 3

Supplement: supp [file elife_poa_e26371_Figure_3_figure_supplement3.pdf › elife_poa_e26371_Figure_3_figure_supplement3.pdf]

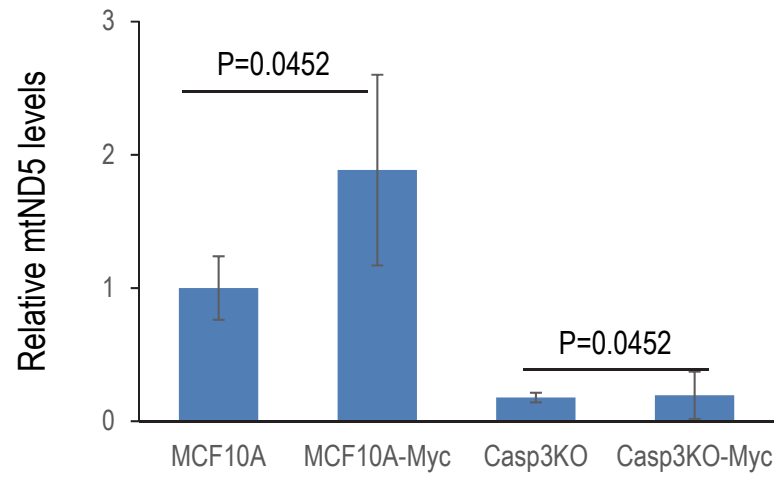

Fig.3-figure supplement 4

Supplement: supp [file elife_poa_e26371_Figure_3_figure_supplement4.pdf › elife_poa_e26371_Figure_3_figure_supplement4.pdf]
